# Supplementary material for: The success of woody plant removal depends on encroachment stage and plant traits
Source: Springer Nature journal article supplement (doi:10.1038/s41477-022-01307-7), 2022-12-21
Supplement: 41477_2022_1307_MOESM1_ESM.pdf [file 41477_2022_1307_MOESM1_ESM.pdf]

---

# The success of woody plant removal depends on encroachment stage and plant traits

---

In the format provided by the authors and unedited

---

**Supplementary Information for**

**The success of woody plant removal depends on encroachment stage and plant traits**

Jingyi Ding, David Eldridge

**This file includes:**

Supplementary Figs. 1-5

Supplementary Tables 1-10

Appendix S1-S4

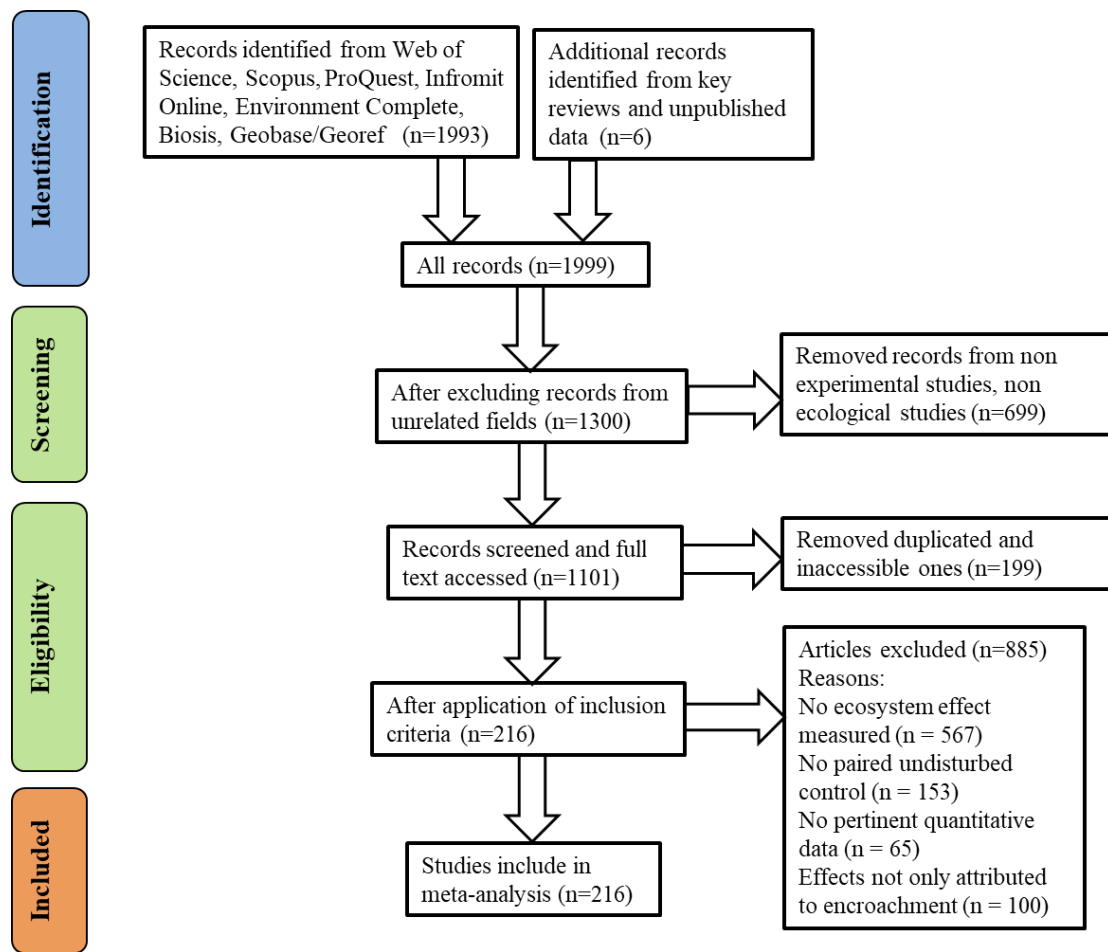

**Supplementary Figure 1.** Woody encroachment meta-analysis literature searching PRISMA flow diagram

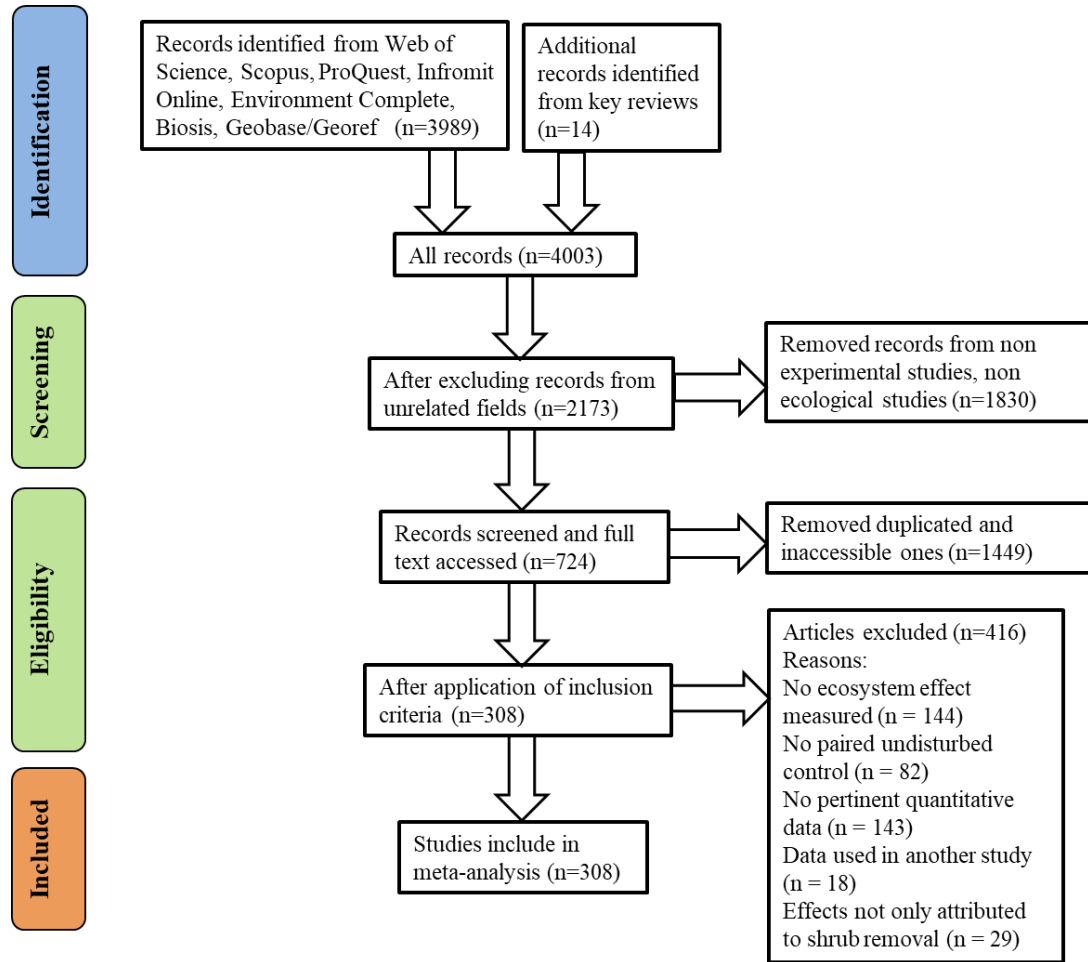

**Supplementary Figure 2.** Woody plant removal meta-analysis literature searching PRISMA flow diagram

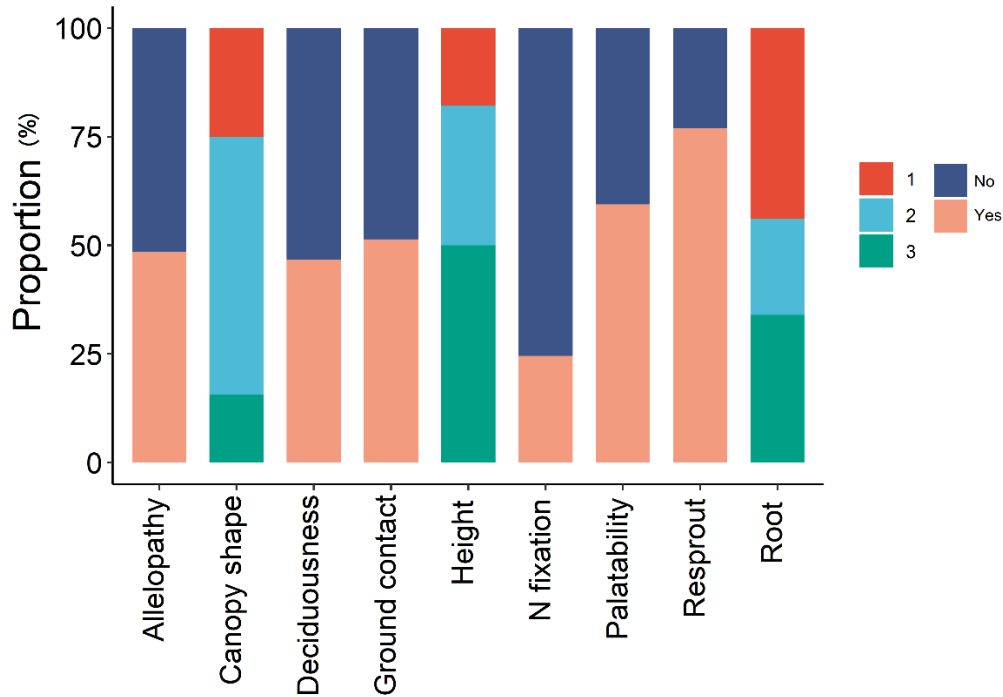

**Supplementary Figure 3.** The percentage contribution of values of each of the nine plant traits across 213 encroached woody species. To facilitate the quantitative analysis of plant traits, we ranked the following categorical traits as numeric values, with details shown in Appendix S3. Plant canopy shape: ranked according to a greater ability to obtain resources (water and light) for the understorey, with greater resource accumulation under v-shaped plants but greater rainfall accumulation beneath pyramid-shaped plants (i.e., inverted v-shaped), (v-shaped = 1, weeping/round = 2, pyramid = 3). Height: mean plant height (<1m = 1, 1-3m = 2, >3m = 3). Root type: higher values relate to potentially greater nutrient cycling and water infiltration (tap roots = 1, lateral roots = 2, tap and lateral roots = 3).

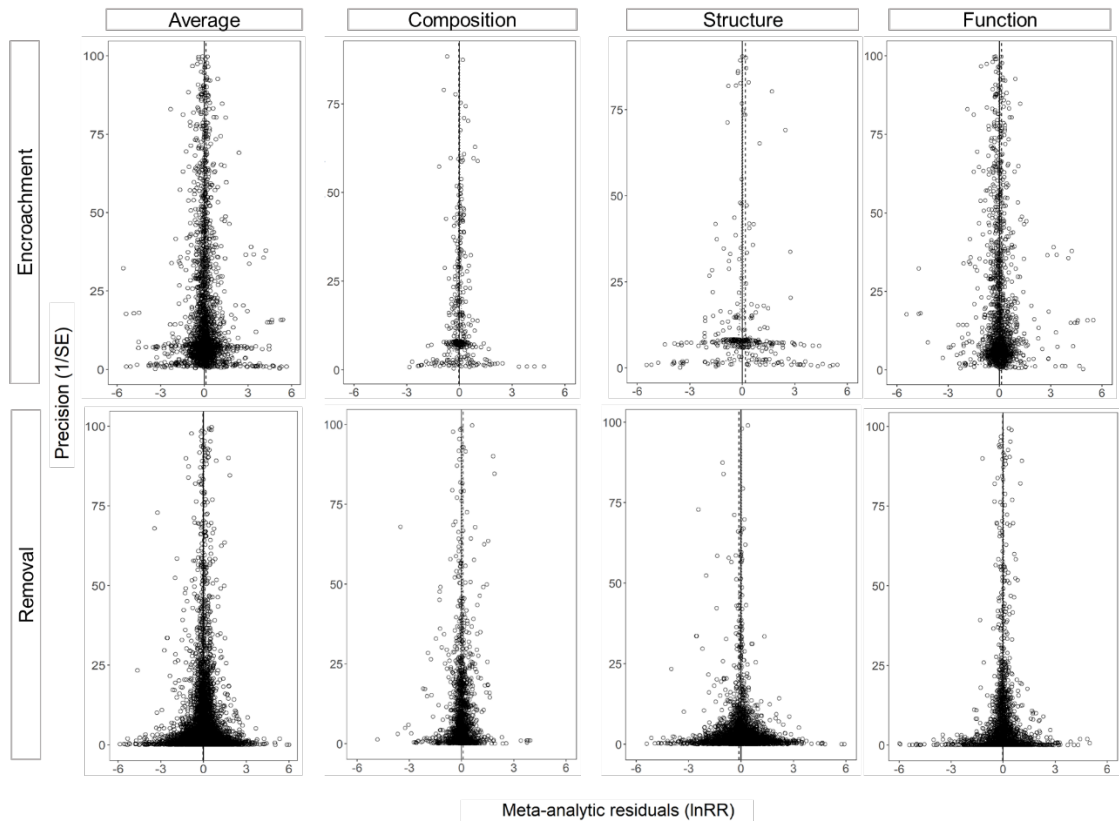

**Supplementary Figure 4.** Funnel plot of precision (inverse of standard error) plotted against effect size residuals for encroachment database and removal database for the average ecosystem response (the whole dataset), ecosystem structure, ecosystem function, and ecosystem composition, respectively.

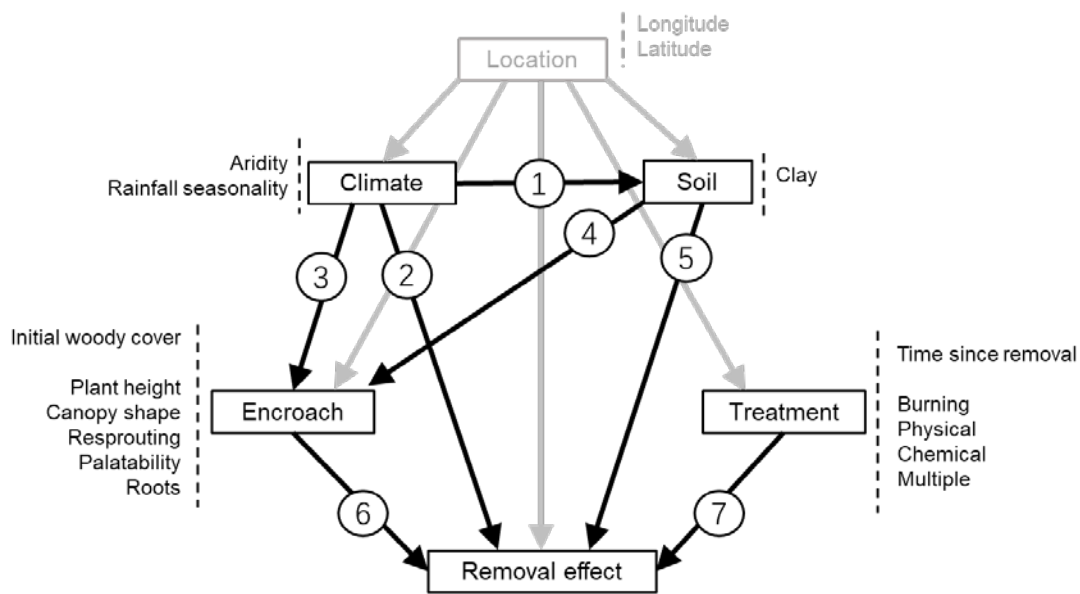

**Supplementary Figure 5.** *A priori* model of the predicted direct effects and the indirect effects of climate (aridity, rainfall seasonality) and soil (soil clay content) on the ecosystem response of woody removal, mediated by changes in encroachment characteristics (e.g., the initial woody cover before removal and the traits of the target woody plants). Different removal treatments and time since removal are fixed and are hypothesized to directly affect the removal effect. This model also takes account of the potential effect of spatial location (longitude, latitude). Our *a priori* model predicted that environmental conditions (i.e., climate and soil) would have direct effects on the ecosystem responses of woody removal, as well as indirect effects, mediated by the encroachment signature (i.e., initial cover of woody plants and traits of the removed woody plants). The different woody plant removal treatments and time since removal were fixed according to the particular studies, as selection of removal method depends on many financial and feasible factors, and the time of measuring removal effects was decided by the people who conducted the study. Therefore, we only explored the direct effects of treatment method and time on ecosystem responses in this meta-analysis.

**Supplementary Table 1.** Response variables arranged by ecological attributes for ecosystem structure, function and composition and the cases number for each variable at either encroachment or removal database. Our study conducted analysis on the LnRR of ‘Overall’ and ‘Ecological attributes’ (except for ‘Other’) categories.

| <b>Overall</b>        | <b>Ecological attributes</b> | <b>Response variables</b> | <b>Removal</b> | <b>Encroach</b> |
|-----------------------|------------------------------|---------------------------|----------------|-----------------|
| Ecosystem composition | Animal diversity             | Amphibian abundance       | 32             | 0               |
| Ecosystem composition | Animal diversity             | Amphibian diversity       | 4              | 1               |
| Ecosystem composition | Animal diversity             | Arthropod abundance       | 157            | 66              |
| Ecosystem composition | Animal diversity             | Arthropod diversity       | 114            | 18              |
| Ecosystem composition | Animal diversity             | Bird abundance            | 149            | 0               |
| Ecosystem composition | Animal diversity             | Bird diversity            | 29             | 9               |
| Ecosystem composition | Animal diversity             | Mammal abundance          | 179            | 1               |
| Ecosystem composition | Animal diversity             | Mammal diversity          | 108            | 27              |
| Ecosystem composition | Microbial diversity          | Bacterial abundance       | 3              | 73              |
| Ecosystem composition | Microbial diversity          | Bacterial diversity       | 1              | 10              |
| Ecosystem composition | Microbial diversity          | Fungal abundance          | 16             | 40              |
| Ecosystem composition | Microbial diversity          | Fungal richness           | 40             | 2               |
| Ecosystem composition | Microbial diversity          | Microbial abundance       | 0              | 8               |
| Ecosystem composition | Plant diversity              | Forb richness             | 39             | 0               |
| Ecosystem composition | Plant diversity              | Graminoids richness       | 17             | 0               |
| Ecosystem composition | Plant diversity              | Grass richness            | 212            | 1               |
| Ecosystem composition | Plant diversity              | Herb richness             | 79             | 0               |
| Ecosystem composition | Plant diversity              | Herbaceous richness       | 119            | 0               |
| Ecosystem composition | Plant diversity              | Plant richness            | 484            | 132             |
| Ecosystem composition | Plant diversity              | Shrub richness            | 135            | 17              |
| Ecosystem composition | Plant diversity              | Tree richness             | 56             | 4               |
| Ecosystem composition | Plant diversity              | Woody richness            | 24             | 1               |
| Ecosystem function    | Carbon stocks                | Aboveground C             | 40             | 19              |
| Ecosystem function    | Carbon stocks                | Belowground plant C       | 16             | 9               |
| Ecosystem function    | Carbon stocks                | Soil C                    | 196            | 530             |
| Ecosystem function    | Non-woody biomass            | Forb biomass              | 193            | 12              |
| Ecosystem function    | Non-woody biomass            | Graminoids biomass        | 16             | 0               |
| Ecosystem function    | Non-woody biomass            | Grass biomass             | 630            | 10              |
| Ecosystem function    | Non-woody biomass            | Herb biomass              | 14             | 0               |
| Ecosystem function    | Non-woody biomass            | Herbaceous biomass        | 28             | 0               |
| Ecosystem function    | Soil fertility               | Soil enzyme               | 48             | 1               |
| Ecosystem function    | Soil fertility               | Soil nutrients            | 309            | 707             |
| Ecosystem function    | Soil hydrology               | Soil infiltration         | 38             | 56              |
| Ecosystem function    | Soil hydrology               | Soil moisture             | 139            | 70              |
| Ecosystem function    | Soil stability               | Leaching nutrition        | 22             | 0               |
| Ecosystem function    | Soil stability               | Runoff                    | 62             | 18              |
| Ecosystem function    | Soil stability               | Soil sediment             | 49             | 3               |



|                     |                   |                          |     |     |
|---------------------|-------------------|--------------------------|-----|-----|
| Ecosystem function  | Soil stability    | Soil stability           | 12  | 45  |
| Ecosystem function  | Woody biomass     | Shrub biomass            | 188 | 8   |
| Ecosystem function  | Woody biomass     | Tree biomass             | 29  | 0   |
| Ecosystem function  | Woody biomass     | Woody biomass            | 13  | 1   |
| Ecosystem function  | Other             | Belowground biomass      | 0   | 1   |
| Ecosystem function  | Other             | Cryptogam biomass        | 6   | 0   |
| Ecosystem function  | Other             | Environment condition    | 4   | 0   |
| Ecosystem function  | Other             | Evapotranspiration       | 50  | 53  |
| Ecosystem function  | Other             | Forage biomass           | 158 | 0   |
| Ecosystem function  | Other             | Litter biomass           | 76  | 10  |
| Ecosystem function  | Other             | Litter decomposition     | 1   | 7   |
| Ecosystem function  | Other             | Microbial biomass        | 9   | 5   |
| Ecosystem function  | Other             | Microbial nutrient       | 0   | 12  |
| Ecosystem function  | Other             | Plant nutrition          | 286 | 54  |
| Ecosystem function  | Other             | Plant physiology         | 59  | 3   |
| Ecosystem function  | Other             | Pollination              | 0   | 3   |
| Ecosystem function  | Other             | Soil element             | 35  | 38  |
| Ecosystem function  | Other             | Soil microtopography     | 50  | 0   |
| Ecosystem function  | Other             | Soil physical properties | 130 | 321 |
| Ecosystem function  | Other             | Vegetation biomass       | 186 | 120 |
| Ecosystem function  | Other             | Water recharge           | 13  | 5   |
| Ecosystem function  | Other             | Species turnover         | 34  | 0   |
| Ecosystem function  | Other             | Landscape proportion     | 8   | 0   |
| Ecosystem function  | Other             | Plant interactions       | 6   | 2   |
| Ecosystem function  | Other             | Animal biomass           | 10  | 2   |
| Ecosystem structure | Litter cover      | Litter cover             | 143 | 14  |
| Ecosystem structure | Non-woody cover   | Fern cover               | 12  | 0   |
| Ecosystem structure | Non-woody cover   | Forb cover               | 266 | 2   |
| Ecosystem structure | Non-woody cover   | Graminoids cover         | 37  | 0   |
| Ecosystem structure | Non-woody cover   | Grass cover              | 542 | 48  |
| Ecosystem structure | Non-woody cover   | Herb cover               | 54  | 0   |
| Ecosystem structure | Non-woody cover   | Herbaceous cover         | 36  | 1   |
| Ecosystem structure | Non-woody cover   | Legumes cover            | 2   | 0   |
| Ecosystem structure | Non-woody density | Forb density             | 182 | 0   |
| Ecosystem structure | Non-woody density | Grass density            | 294 | 0   |
| Ecosystem structure | Non-woody density | Herb density             | 1   | 0   |
| Ecosystem structure | Woody cover       | Shrub cover              | 576 | 62  |
| Ecosystem structure | Woody cover       | Tree cover               | 132 | 7   |
| Ecosystem structure | Woody cover       | Woody cover              | 135 | 1   |
| Ecosystem structure | Woody density     | Shrub density            | 267 | 5   |
| Ecosystem structure | Woody density     | Tree density             | 98  | 0   |
| Ecosystem structure | Woody density     | Woody density            | 59  | 1   |
| Ecosystem structure | Bareground cover  | Bare ground cover        | 152 | 33  |

|                     |                |                           |     |     |
|---------------------|----------------|---------------------------|-----|-----|
| Ecosystem structure | Biocrust cover | Cryptogam cover           | 73  | 22  |
| Ecosystem structure | Other          | Forb structure            | 6   | 0   |
| Ecosystem structure | Other          | Graminoids structure      | 8   | 0   |
| Ecosystem structure | Other          | Grass structure           | 32  | 6   |
| Ecosystem structure | Other          | Lichen density            | 4   | 0   |
| Ecosystem structure | Other          | Litter structure          | 10  | 1   |
| Ecosystem structure | Other          | Mean proximity index      | 3   | 0   |
| Ecosystem structure | Other          | Mean shape index          | 2   | 0   |
| Ecosystem structure | Other          | Moss density              | 12  | 0   |
| Ecosystem structure | Other          | Nearest neighbor distance | 4   | 0   |
| Ecosystem structure | Other          | Nest height               | 3   | 0   |
| Ecosystem structure | Other          | Patch density             | 24  | 0   |
| Ecosystem structure | Other          | Patch size                | 3   | 33  |
| Ecosystem structure | Other          | Plant density             | 19  | 0   |
| Ecosystem structure | Other          | Shrub structure           | 120 | 7   |
| Ecosystem structure | Other          | Tree structure            | 299 | 6   |
| Ecosystem structure | Other          | Vegetation cover          | 225 | 104 |
| Ecosystem structure | Other          | Vegetation density        | 112 | 6   |
| Ecosystem structure | Other          | Vegetation structure      | 9   | 18  |
| Ecosystem structure | Other          | Woody structure           | 49  | 0   |
| Ecosystem structure | Other          | Woody survival            | 121 | 0   |

**Supplementary Table 2.** The database of 9 attributes of the 213 woody plants that were managed in studies. Notes: Height = mean height (m); Shape = the shape of the woody canopy; Ground = whether foliage contact ground, Pala = Palatability, Allelo = Allelopathy, Y = yes, N = no; Deciduous = deciduousness; Root = roots type i.e. L = lateral, T = tap, LT = lateral and tap root.

| Genera | Dominant woody species      | Height | Ground | Shape     | Deciduous | Pala | N fixation | Allelo | Resprout | Root |
|--------|-----------------------------|--------|--------|-----------|-----------|------|------------|--------|----------|------|
| Abies  | <i>Abies grandis</i>        | 55     | N      | pyramidal | Evergreen | Y    | N          | Y      | Y        | LT   |
| Acacia | <i>Acacia aneura</i>        | 1      | N      | pyramidal | Evergreen | Y    | Y          | N      | Y        | LT   |
| Acacia | <i>Acacia bellula</i>       | 3      | Y      | round     | Evergreen | Y    | Y          | N      | Y        | T    |
| Acacia | <i>Acacia caven</i>         | 4      | N      | v-shaped  | Deciduous | Y    | Y          | Y      | Y        | T    |
| Acacia | <i>Acacia cyclops</i>       | 3      | Y      | round     | Evergreen | Y    | Y          | N      | Y        | T    |
| Acacia | <i>Acacia drepanolobium</i> | 8.8    | N      | v-shaped  | Deciduous | Y    | Y          | Y      | Y        | LT   |
| Acacia | <i>Acacia gilliesii</i>     | 3      | N      | v-shaped  | Deciduous | Y    | Y          | Y      | Y        | L    |
| Acacia | <i>Acacia karroo</i>        | 7      | N      | round     | Deciduous | N    | Y          | Y      | Y        | LT   |
| Acacia | <i>Acacia mearnsii</i>      | 6      | Y      | round     | Evergreen | Y    | Y          | N      | Y        | LT   |
| Acacia | <i>Acacia mellifera</i>     | 6.7    | N      | v-shaped  | Deciduous | Y    | Y          | Y      | Y        | LT   |
| Acacia | <i>Acacia mellifera</i>     | 7.5    | N      | v-shaped  | Deciduous | Y    | Y          | Y      | Y        | LT   |
| Acacia | <i>Acacia nigrescens</i>    | 10     | N      | v-shaped  | Deciduous | N    | Y          | Y      | Y        | T    |
| Acacia | <i>Acacia rigidula</i>      | 3      | N      | v-shaped  | Deciduous | Y    | Y          | Y      | Y        | T    |
| Acacia | <i>Acacia saligna</i>       | 10     | N      | round     | Evergreen | Y    | Y          | Y      | Y        | LT   |
| Acacia | <i>Acacia tortilis</i>      | 12     | N      | round     | Deciduous | Y    | Y          | Y      | Y        | LT   |
| Acacia | <i>Acacia verticillata</i>  | 3      | N      | v-shaped  | Evergreen | N    | Y          | Y      | Y        | T    |
| Acer   | <i>Acer campestre</i>       | 15     | N      | round     | Deciduous | N    | N          | N      | N        | T    |
| Acer   | <i>Acer circinatum</i>      | 4.5    | N      | round     | Deciduous | Y    | N          | N      | Y        | T    |
| Acer   | <i>Acer macrophyllum</i>    | 17     | N      | round     | Deciduous | Y    | N          | N      | N        | T    |

|                |                                 |      |   |           |           |   |   |   |   |    |
|----------------|---------------------------------|------|---|-----------|-----------|---|---|---|---|----|
| Acer           | <i>Acer rubrum</i>              | 22   | N | round     | Deciduous | Y | N | N | N | L  |
| Acer           | <i>Acer saccharum</i>           | 30   | N | pyramidal | Deciduous | Y | N | N | Y | LT |
| Adenostoma     | <i>Adenostoma fasciculatum</i>  | 2    | N | pyramidal | Deciduous | Y | N | N | Y | LT |
| Alnenion       | <i>Alnenion viridis</i>         | 1    | Y | round     | Deciduous | N | Y | Y | Y | LT |
| Alnus          | <i>Alnus glutinosa</i>          | 30   | N | pyramidal | Deciduous | Y | Y | Y | Y | LT |
| Alnus          | <i>Alnus sibirica</i>           | 10   | N | pyramidal | Deciduous | N | Y | Y | Y | T  |
| Aloysia        | <i>Aloysia gratissima</i>       | 2.5  | N | pyramidal | Deciduous | Y | N | N | Y | L  |
| Amorpha        | <i>Amorpha fruticosa</i>        | 3    | Y | round     | Deciduous | Y | N | Y | Y | LT |
| Arctostaphylos | <i>Arctostaphylos canescens</i> | 1.5  | N | round     | Deciduous | Y | N | Y | N | LT |
| Arctostaphylos | <i>Arctostaphylos patula</i>    | 1.5  | Y | round     | Deciduous | Y | N | Y | Y | T  |
| Arctostaphylos | <i>Arctostaphylos uva-ursi</i>  | 0.1  | Y | round     | Evergreen | Y | N | N | Y | L  |
| Arctostaphylos | <i>Arctostaphylos viscida</i>   | 2.5  | N | round     | Deciduous | Y | N | Y | Y | T  |
| Artemisia      | <i>Artemisia frigida</i>        | 0.1  | Y | weeping   | Deciduous | Y | N | Y | N | LT |
| Artemisia      | <i>Artemisia monosperma</i>     | 0.8  | Y | weeping   | Evergreen | Y | N | N | N | LT |
| Artemisia      | <i>Artemisia ordosica</i>       | 0.2  | Y | round     | Deciduous | Y | N | Y | N | LT |
| Artemisia      | <i>Artemisia rothrockii</i>     | 0.35 | Y | round     | Evergreen | N | N | Y | N | LT |
| Artemisia      | <i>Artemisia tridentata</i>     | 0.8  | Y | round     | Evergreen | Y | N | Y | N | LT |
| Asimina        | <i>Asimina triloba</i>          | 10   | Y | round     | Evergreen | N | N | N | N | T  |
| Aspidosperma   | <i>Aspidosperma</i>             | 20   | N | round     | Deciduous | Y | Y | Y | Y | L  |
| Avicennia      | <i>Avicennia germinans</i>      | 8    | Y | round     | Evergreen | N | N | N | Y | LT |
| Baccharis      | <i>Baccharis conferta</i>       | 1.5  | Y | round     | Deciduous | Y | N | N | N | T  |
| Baccharis      | <i>Baccharis pilularis</i>      | 3    | Y | weeping   | Evergreen | N | N | N | Y | LT |
| Baccharis      | <i>Baccharis punctulata</i>     | 1    | Y | round     | Evergreen | N | N | Y | Y | L  |
| Bacharis       | <i>Bacharis</i>                 | 2    | Y | weeping   | Evergreen | Y | N | Y | Y | L  |
| Berberis       | <i>Berberis vulgaris</i>        | 2    | Y | round     | Deciduous | N | N | N | Y | L  |

|                  |                                    |      |   |           |           |   |   |   |   |    |
|------------------|------------------------------------|------|---|-----------|-----------|---|---|---|---|----|
| Betula           | <i>Betula fruticosa</i>            | 0.5  | Y | round     | Evergreen | N | N | N | Y | L  |
| Betula           | <i>Betula glandulosa</i>           | 1    | Y | round     | Deciduous | N | N | Y | N | LT |
| Betula           | <i>Betula nana</i>                 | 1    | Y | round     | Deciduous | Y | N | N | N | L  |
| Betula           | <i>Betula sp.</i>                  | 1    | Y | round     | Deciduous | Y | N | N | N | L  |
| Brachypodium     | <i>Brachypodium pinnatum</i>       | 0.5  | Y | pyramidal | Evergreen | Y | N | N | Y | L  |
| Brachystegia     | <i>Brachystegia spiciformis</i>    | 8    | N | v-shaped  | Deciduous | Y | Y | N | Y | LT |
| Callitris        | <i>Callitris glaucophylla</i>      | 0.5  | N | pyramidal | Evergreen | N | N | Y | Y | LT |
| Calluna          | <i>Calluna vulgaris</i>            | 0.35 | Y | round     | Evergreen | Y | N | N | Y | L  |
| Capparis         | <i>Capparis atamisquea</i>         | 4    | N | v-shaped  | Deciduous | Y | N | N | Y | L  |
| Caragana         | <i>Caragana brachypoda</i>         | 0.5  | Y | round     | Deciduous | Y | Y | N | Y | L  |
| Caragana         | <i>Caragana microphylla</i>        | 0.8  | Y | round     | Deciduous | Y | Y | N | Y | L  |
| Cassinia         | <i>Cassinia aculeata</i>           | 1.75 | N | v-shaped  | Evergreen | N | N | N | Y | LT |
| Ceanothus        | <i>Ceanothus cordulatus</i>        | 40   | N | pyramidal | Evergreen | Y | N | Y | N | T  |
| Ceanothus        | <i>Ceanothus cuneatus</i>          | 2    | Y | weeping   | Evergreen | Y | N | N | Y | T  |
| Ceanothus        | <i>Ceanothus velutinus</i>         | 2    | Y | weeping   | Evergreen | Y | Y | N | Y | T  |
| Celtis           | <i>Celtis ehrenbergiana</i>        | 2    | Y | round     | Evergreen | Y | N | N | Y | L  |
| Chrysanthemoides | <i>Chrysanthemoides monilifera</i> | 2    | Y | round     | Evergreen | N | N | Y | Y | T  |
| Chrysolepis      | <i>Chrysolepis sempervirens</i>    | 2.1  | N | round     | Evergreen | Y | N | N | Y | T  |
| Chuquiraga       | <i>Chuquiraga avellanadae</i>      | 0.5  | Y | round     | Evergreen | N | N | Y | Y | T  |
| Chuquiraga       | <i>Chuquiraga erinacea</i>         | 2    | Y | round     | Evergreen | Y | N | N | Y | T  |
| Cistus           | <i>Cistus ladanifer</i>            | 1    | Y | round     | Deciduous | N | N | Y | Y | T  |
| Cistus           | <i>Cistus monspeliensis</i>        | 1    | Y | round     | Evergreen | N | N | Y | Y | LT |
| Cistus           | <i>Cistus salvifolius</i>          | 0.6  | Y | round     | Evergreen | N | N | N | Y | L  |
| Combretum        | <i>Combretum apiculatum</i>        | 8    | N | v-shaped  | Deciduous | N | N | N | Y | L  |
| Combretum        | <i>Combretum laxum</i>             | 15   | N | v-shaped  | Evergreen | N | N | N | Y | T  |

|                |                                |     |   |           |           |   |   |   |   |    |
|----------------|--------------------------------|-----|---|-----------|-----------|---|---|---|---|----|
| Combretum      | <i>Combretum tenuifolium</i>   | 6   | N | pyramidal | Deciduous | Y | N | N | Y | L  |
| Condalia       | <i>Condalia microphylla</i>    | 1   | Y | v-shaped  | Evergreen | Y | N | Y | Y | T  |
| Cornus         | <i>Cornus drummondii</i>       | 5.5 | N | round     | Deciduous | Y | N | N | Y | T  |
| Cornus         | <i>Cornus sericea</i>          | 2.5 | Y | round     | Deciduous | Y | N | N | Y | L  |
| Crossopteryx   | <i>Crossopteryx ferruginea</i> | 7   | N | v-shaped  | Evergreen | N | N | N | N | T  |
| Curatella      | <i>Curatella americana</i>     | 4   | N | round     | Deciduous | N | N | Y | Y | LT |
| Cylindropuntia | <i>Cylindropuntia fulgida</i>  | 2   | N | v-shaped  | Evergreen | Y | N | N | Y | L  |
| Cytisus        | <i>Cytisus scoparius</i>       | 2   | Y | round     | Evergreen | Y | Y | N | Y | T  |
| Detarium       | <i>Detarium microcarpum</i>    | 15  | N | v-shaped  | Deciduous | Y | N | N | Y | T  |
| Dichrostachys  | <i>Dichrostachys cinerea</i>   | 1   | Y | weeping   | Deciduous | Y | Y | N | Y | LT |
| Diospyros      | <i>Diospyros lycioides</i>     | 3   | Y | round     | Evergreen | N | N | N | Y | LT |
| Dodonaea       | <i>Dodonaea viscosa</i>        | 2   | N | v-shaped  | Evergreen | Y | N | N | Y | LT |
| Echinopartum   | <i>Echinopartum horridum</i>   | 0.1 | Y | round     | Evergreen | N | N | N | Y | L  |
| Eremophila     | <i>Eremophila gilesii</i>      | 0.3 | Y | round     | Evergreen | N | N | N | Y | LT |
| Eremophila     | <i>Eremophila mitchellii</i>   | 0.5 | Y | v-shaped  | Evergreen | N | N | N | Y | T  |
| Eremophila     | <i>Eremophila sturtii</i>      | 2.5 | Y | v-shaped  | Evergreen | N | N | N | Y | T  |
| Erica          | <i>Erica scoparia</i>          | 2   | Y | v-shaped  | Evergreen | N | N | Y | Y | LT |
| Eucalyptus     | <i>Eucalyptus coolabah</i>     | 2   | N | round     | Evergreen | N | N | N | Y | T  |
| Eucalyptus     | <i>Eucalyptus crebera</i>      | 2   | N | round     | Evergreen | N | N | N | Y | T  |
| Eucalyptus     | <i>Eucalyptus grandis</i>      | 30  | N | pyramidal | Evergreen | N | N | N | Y | T  |
| Eucalyptus     | <i>Eucalyptus largiflorens</i> | 2   | N | round     | Evergreen | N | N | N | Y | T  |
| Eucalyptus     | <i>Eucalyptus populnea</i>     | 2   | N | round     | Evergreen | N | N | Y | Y | LT |
| Flourensia     | <i>Flourensia cernua</i>       | 1   | N | v-shaped  | Deciduous | N | N | N | Y | L  |
| Frangula       | <i>Frangula alnus</i>          | 4   | Y | round     | Deciduous | Y | N | Y | Y | L  |
| Galenia        | <i>Galenia africana</i>        | 0.5 | Y | v-shaped  | Deciduous | N | N | Y | Y | T  |

|             |                               |     |   |           |           |   |   |   |   |    |
|-------------|-------------------------------|-----|---|-----------|-----------|---|---|---|---|----|
| Genista     | <i>Genista hirsuta</i>        | 0.8 | Y | round     | Evergreen | N | Y | Y | Y | T  |
| Genista     | <i>Genista scorpius</i>       | 1.5 | Y | v-shaped  | Deciduous | N | Y | N | Y | LT |
| Gliricidia  | <i>Gliricidia sepium</i>      | 10  | N | v-shaped  | Deciduous | Y | Y | Y | Y | LT |
| Grewia      | <i>Grewia flava</i>           | 0.5 | Y | weeping   | Deciduous | Y | N | N | N | LT |
| Guiera      | <i>Guiera senegalensis</i>    | 2   | Y | v-shaped  | Evergreen | Y | Y | Y | Y | T  |
| Gutierrezia | <i>Gutierrezia sarothrae</i>  | 0.6 | Y | round     | Deciduous | Y | N | N | Y | T  |
| Haloxylon   | <i>Haloxylon ammodendron</i>  | 6   | Y | v-shaped  | Evergreen | N | N | Y | N | LT |
| ilex        | <i>ilex vomitoria</i>         | 6   | Y | weeping   | Evergreen | Y | N | N | N | L  |
| Isocoma     | <i>Isocoma veneta</i>         | 0.4 | Y | round     | Deciduous | N | N | N | Y | LT |
| Juniperus   | <i>Juniperus ashei</i>        | 10  | N | v-shaped  | Evergreen | N | N | Y | N | T  |
| Juniperus   | <i>Juniperus communis</i>     | 9   | N | round     | Evergreen | N | N | Y | Y | T  |
| Juniperus   | <i>Juniperus excelsa</i>      | 10  | Y | round     | Evergreen | N | Y | Y | N | T  |
| Juniperus   | <i>Juniperus monosperma</i>   | 2   | Y | round     | Evergreen | N | N | Y | N | LT |
| Juniperus   | <i>Juniperus nana</i>         | 0.2 | N | pyramidal | Evergreen | N | N | Y | N | T  |
| Juniperus   | <i>Juniperus occidentalis</i> | 8   | N | pyramidal | Evergreen | N | N | Y | N | T  |
| Juniperus   | <i>Juniperus osteosperma</i>  | 6   | N | pyramidal | Evergreen | N | N | Y | Y | LT |
| Juniperus   | <i>Juniperus oxycedrus</i>    | 1   | N | round     | Evergreen | N | N | Y | N | T  |
| Juniperus   | <i>Juniperus pinchoti</i>     | 8   | N | pyramidal | Evergreen | Y | N | Y | N | LT |
| Juniperus   | <i>Juniperus sabrina</i>      | 1.5 | Y | weeping   | Evergreen | N | N | Y | N | LT |
| Juniperus   | <i>Juniperus virginiana</i>   | 14  | N | pyramidal | Evergreen | N | N | Y | N | LT |
| Larrea      | <i>Larrea cuneifolia</i>      | 2   | N | v-shaped  | Evergreen | Y | N | Y | Y | T  |
| Larrea      | <i>Larrea divaricata</i>      | 2   | N | v-shaped  | Evergreen | Y | N | N | Y | LT |
| Larrea      | <i>Larrea tridentata</i>      | 2   | N | v-shaped  | Evergreen | N | N | Y | Y | LT |
| Leucaena    | <i>Leucaena leucocephala</i>  | 10  | N | v-shaped  | Deciduous | Y | Y | Y | Y | L  |
| Ligustrum   | <i>Ligustrum sinense</i>      | 5   | N | round     | Deciduous | Y | Y | Y | Y | T  |

|             |                                |     |   |           |           |   |   |   |   |    |
|-------------|--------------------------------|-----|---|-----------|-----------|---|---|---|---|----|
| Liquidambar | <i>Liquidambar styraciflua</i> | 18  | N | round     | Deciduous | Y | N | N | Y | L  |
| Lonicera    | <i>Lonicera maackii</i>        | 4   | N | v-shaped  | Deciduous | Y | Y | Y | Y | LT |
| Lonicera    | <i>Lonicera morrowii</i>       | 2   | N | round     | Deciduous | Y | Y | Y | Y | L  |
| Lupinus     | <i>Lupinus arboreus</i>        | 1.5 | Y | round     | Evergreen | Y | Y | N | N | L  |
| Maerua      | <i>Maerua crassifolia</i>      | 1   | Y | round     | Evergreen | Y | N | N | Y | T  |
| Maireana    | <i>Maireana pyramidata</i>     | 1   | Y | round     | Deciduous | N | N | N | Y | T  |
| Mimosa      | <i>Mimosa biuncifera</i>       | 0.5 | Y | v-shaped  | Deciduous | Y | Y | N | Y | LT |
| Mulinum     | <i>Mulinum spinosum</i>        | 0.5 | Y | round     | Evergreen | N | N | N | Y | T  |
| Myoporum    | <i>Myoporum montanum</i>       | 0.5 | Y | round     | Evergreen | N | N | Y | Y | T  |
| Myrcia      | <i>Myrcia guianensis</i>       | 2   | N | round     | Evergreen | N | N | Y | N | LT |
| Myrica      | <i>Myrica cerifera</i>         | 3.5 | N | round     | Evergreen | Y | Y | N | Y | T  |
| Phlomis     | <i>Phlomis fruticosa</i>       | 1   | Y | round     | Evergreen | Y | N | N | Y | T  |
| Picea       | <i>Picea abies</i>             | 40  | N | pyramidal | Evergreen | Y | N | N | N | LT |
| Picea       | <i>Picea engelmannii</i>       | 30  | N | pyramidal | Evergreen | Y | N | N | N | T  |
| Picea       | <i>Picea glauca</i>            | 20  | N | pyramidal | Evergreen | Y | N | N | N | LT |
| Picea       | <i>Picea mariana</i>           | 10  | N | pyramidal | Evergreen | Y | N | N | N | LT |
| Pinus       | <i>Pinus banksiana</i>         | 15  | N | pyramidal | Evergreen | Y | N | N | N | T  |
| Pinus       | <i>Pinus elliotii</i>          | 22  | N | v-shaped  | Evergreen | Y | N | N | N | T  |
| Pinus       | <i>Pinus monophylla</i>        | 5   | Y | v-shaped  | Evergreen | N | N | Y | N | T  |
| Pinus       | <i>Pinus palustris</i>         | 30  | N | v-shaped  | Evergreen | Y | N | Y | N | T  |
| Pinus       | <i>Pinus pinea</i>             | 17  | N | v-shaped  | Evergreen | N | N | Y | N | T  |
| Pinus       | <i>Pinus ponderosa</i>         | 40  | N | pyramidal | Evergreen | N | N | Y | N | T  |
| Pinus       | <i>Pinus resinosa</i>          | 25  | N | pyramidal | Evergreen | Y | N | Y | N | T  |
| Pinus       | <i>Pinus strobus</i>           | 50  | N | pyramidal | Deciduous | Y | N | Y | N | T  |
| Pinus       | <i>Pinus sylvestris</i>        | 35  | N | pyramidal | Evergreen | Y | N | N | N | T  |



|              |                                   |     |   |           |           |   |   |   |   |    |
|--------------|-----------------------------------|-----|---|-----------|-----------|---|---|---|---|----|
| Pinus        | <i>Pinus spp.</i>                 | 40  | N | pyramidal | Evergreen | N | N | Y | N | T  |
| Pistacia     | <i>Pistacia lentiscus</i>         | 2.5 | N | v-shaped  | Evergreen | Y | N | Y | Y | T  |
| Populus      | <i>Populus deltoides</i>          | 30  | N | v-shaped  | Deciduous | Y | Y | Y | Y | L  |
| Populus      | <i>Populus tremuloides</i>        | 20  | N | pyramidal | Evergreen | Y | N | N | Y | T  |
| Portulacaria | <i>Portulacaria afra</i>          | 1.5 | Y | weeping   | Evergreen | N | N | N | Y | L  |
| Potentilla   | <i>Potentilla fruticosa</i>       | 0.6 | Y | round     | Deciduous | N | N | Y | Y | LT |
| Prosopis     | <i>Prosopis affinis</i>           | 5   | N | v-shaped  | Deciduous | Y | Y | Y | Y | T  |
| Prosopis     | <i>Prosopis caldenia</i>          | 8   | N | weeping   | Deciduous | Y | Y | N | N | T  |
| Prosopis     | <i>Prosopis glandulosa</i>        | 8   | Y | weeping   | Deciduous | Y | N | N | Y | LT |
| Prosopis     | <i>Prosopis juliflora</i>         | 5   | Y | v-shaped  | Deciduous | Y | Y | N | Y | LT |
| Prosopis     | <i>Prosopis laevigata</i>         | 7   | Y | weeping   | Deciduous | Y | Y | N | Y | LT |
| Prosopis     | <i>Prosopis velutina</i>          | 10  | Y | weeping   | Deciduous | Y | Y | N | Y | LT |
| Pruno        | <i>Pruno spinosae-Crataegutum</i> | 0.3 | Y | round     | Evergreen | N | N | N | Y | L  |
| Prunus       | <i>Prunus spinosa</i>             | 3   | Y | round     | Deciduous | N | N | N | Y | LT |
| Pseudotsuga  | <i>Pseudotsuga menziesii</i>      | 40  | N | pyramidal | Evergreen | Y | N | Y | Y | LT |
| Pteronia     | <i>Pteronia incana</i>            | 0.3 | Y | round     | Evergreen | Y | N | N | Y | LT |
| Purshia      | <i>Purshia tridentata</i>         | 3   | Y | round     | Deciduous | Y | N | Y | Y | L  |
| Quercus      | <i>Quercus coccifera</i>          | 4   | Y | weeping   | Evergreen | N | N | Y | Y | T  |
| Quercus      | <i>Quercus ellipsoidalis</i>      | 1   | Y | weeping   | Deciduous | N | N | Y | Y | T  |
| Quercus      | <i>Quercus emoryi</i>             | 5   | Y | weeping   | Evergreen | N | N | Y | Y | T  |
| Quercus      | <i>Quercus havardii</i>           | 1   | N | v-shaped  | Deciduous | Y | N | Y | Y | T  |
| Quercus      | <i>Quercus ilex</i>               | 1   | Y | weeping   | Evergreen | Y | N | Y | Y | T  |
| Quercus      | <i>Quercus marilandica</i>        | 15  | N | round     | Deciduous | Y | N | Y | Y | T  |
| Quercus      | <i>Quercus petraea</i>            | 30  | N | round     | Deciduous | Y | N | Y | Y | T  |
| Quercus      | <i>Quercus pyrenaica</i>          | 20  | N | pyramidal | Deciduous | N | N | Y | Y | LT |

|               |                                 |      |   |           |           |   |   |   |   |    |
|---------------|---------------------------------|------|---|-----------|-----------|---|---|---|---|----|
| Quercus       | <i>Quercus rubra</i>            | 18   | N | pyramidal | Deciduous | Y | N | Y | Y | T  |
| Quercus       | <i>Quercus stellata</i>         | 12   | N | pyramidal | Deciduous | Y | N | Y | Y | T  |
| Quercus       | <i>Quercus turbinella</i>       | 3    | Y | round     | Evergreen | Y | N | N | Y | T  |
| Quercus       | <i>Quercus virginiana</i>       | 20   | N | round     | Evergreen | Y | N | Y | Y | T  |
| Retama        | <i>Retama sphaerocarpa</i>      | 3    | N | v-shaped  | Evergreen | N | Y | N | Y | T  |
| Rhamnus       | <i>Rhamnus cathartica</i>       | 5    | Y | v-shaped  | Deciduous | N | N | Y | Y | T  |
| Rhododendron  | <i>Rhododendron ferrugineum</i> | 0.3  | Y | round     | Evergreen | N | N | Y | Y | L  |
| Rhododendron  | <i>Rhododendron maximum</i>     | 4    | N | round     | Evergreen | N | N | Y | N | T  |
| Rhus          | <i>Rhus aromatic</i>            | 3    | Y | round     | Deciduous | Y | N | N | Y | T  |
| Rhus          | <i>Rhus glabra</i>              | 3    | Y | round     | Deciduous | Y | N | N | Y | T  |
| Ribes         | <i>Ribes missouriense</i>       | 2    | N | round     | Deciduous | Y | N | N | N | LT |
| Rosa          | <i>Rosa multiflora</i>          | 3    | Y | round     | Evergreen | N | N | N | Y | L  |
| Rosmarinus    | <i>Rosmarinus officinalis</i>   | 0.3  | Y | round     | Evergreen | N | N | Y | Y | L  |
| Rubus         | <i>Rubus parviflorus</i>        | 2    | Y | weeping   | Deciduous | Y | N | Y | Y | L  |
| Rubus         | <i>Rubus ulmifolius</i>         | 2    | Y | weeping   | Deciduous | Y | N | Y | Y | T  |
| Salix         | <i>Salix caroliniana</i>        | 8    | N | v-shaped  | Deciduous | Y | N | N | Y | T  |
| Salix         | <i>Salix cinerea</i>            | 6    | Y | round     | Deciduous | Y | N | Y | Y | LT |
| Salix         | <i>Salix pulchra</i>            | 1.2  | Y | round     | Deciduous | Y | N | Y | Y | LT |
| Salix         | <i>Salix repens</i>             | 1.75 | Y | round     | Deciduous | Y | N | N | Y | T  |
| Sarcopoterium | <i>Sarcopoterium spinosum</i>   | 0.5  | Y | weeping   | Deciduous | N | N | Y | Y | T  |
| Schinus       | <i>Schinus terebinthifolius</i> | 8    | N | v-shaped  | Evergreen | Y | N | Y | Y | LT |
| Sclerocarya   | <i>Sclerocarya caffra</i>       | 12   | N | v-shaped  | Evergreen | N | N | N | Y | LT |
| Searsia       | <i>Searsia erosa</i>            | 1.5  | Y | round     | Evergreen | N | N | N | Y | L  |
| Senna         | <i>Senna artemisioides</i>      | 0.5  | Y | round     | Evergreen | N | Y | N | Y | LT |
| Serenoa       | <i>Serenoa repens</i>           | 2    | Y | round     | Deciduous | N | N | Y | Y | LT |

|                |                                    |     |   |           |           |   |   |   |   |    |
|----------------|------------------------------------|-----|---|-----------|-----------|---|---|---|---|----|
| Shepherdia     | <i>Shepherdia argentea</i>         | 1   | Y | round     | Deciduous | N | Y | N | Y | LT |
| Sorbaria       | <i>Sorbaria sorbifolia</i>         | 1   | Y | round     | Deciduous | Y | N | Y | Y | LT |
| Stipa          | <i>Stipa tenacissima</i>           | 0.3 | Y | weeping   | Evergreen | Y | N | N | Y | L  |
| Symphoricarpos | <i>Symphoricarpos occidentalis</i> | 0.6 | Y | round     | Deciduous | Y | N | N | Y | L  |
| Tamarisk       | <i>Tamarisk aphylla</i>            | 5   | N | v-shaped  | Deciduous | Y | Y | Y | Y | T  |
| Terminalia     | <i>Terminalia sericea</i>          | 9   | N | v-shaped  | Deciduous | N | N | Y | Y | L  |
| Tetradymia     | <i>Tetradymia canescens</i>        | 1   | Y | round     | Deciduous | Y | N | Y | Y | LT |
| Tilia          | <i>Tilia americana</i>             | 25  | N | pyramidal | Deciduous | Y | N | N | Y | T  |
| Ulex           | <i>Ulex europaeus</i>              | 3   | Y | round     | Deciduous | N | Y | Y | Y | T  |
| Vaccinium      | <i>Vaccinium angustifolium</i>     | 0.3 | Y | weeping   | Deciduous | Y | N | N | Y | L  |
| Vaccinium      | <i>Vaccinium corymbosum</i>        | 2.5 | N | v-shaped  | Deciduous | Y | N | N | N | L  |
| Vaccinium      | <i>Vaccinium fragile</i>           | 0.5 | Y | round     | Evergreen | N | N | N | Y | L  |
| Vaccinium      | <i>Vaccinium myrtillus</i>         | 1.5 | N | v-shaped  | Deciduous | N | N | Y | Y | L  |
| Vachellia      | <i>Vachellia constricta</i>        | 2   | Y | round     | Evergreen | Y | Y | N | Y | T  |
| Vachellia      | <i>Vachellia erioloba</i>          | 15  | N | v-shaped  | Deciduous | N | N | N | Y | LT |
| Vachellia      | <i>Vachellia karroo</i>            | 8   | Y | round     | Evergreen | Y | Y | N | Y | T  |
| Vachellia      | <i>Vachellia tenuispina</i>        | 2.5 | Y | round     | Evergreen | Y | Y | N | Y | T  |
| Vachellia      | <i>Vachellia tortilis</i>          | 12  | Y | weeping   | Evergreen | Y | Y | Y | Y | LT |
| Viguiera       | <i>Viguiera dentate</i>            | 0.3 | Y | round     | Evergreen | Y | N | N | N | L  |

**Supplementary Table 3.** Numerical values ranked categorical woody plant traits.

| Shape       |         |                   |         | Ground contact |    |    | Deciduousness |           |
|-------------|---------|-------------------|---------|----------------|----|----|---------------|-----------|
| v-shaped    | weeping | round             | pyramid | Yes            | No |    | Deciduous     | Evergreen |
| 1           | 2       | 2                 | 3       | 2              | 1  |    | 2             | 1         |
| Allelopathy |         | Nitrogen fixation |         | Roots type     |    |    | Resprout      |           |
| Yes         | No      | Yes               | No      | T              | L  | LT | Yes           | No        |
| 1           | 2       | 2                 | 1       | 1              | 2  | 3  | 2             | 1         |

**Supplementary Table 4.** Test for funnel plot asymmetry. *P* value was extracted based on two-side test

|              | Ecosystem measure     | <i>z</i> | <i>P</i> value |
|--------------|-----------------------|----------|----------------|
| Encroachment | Average               | 1.33     | 0.18           |
|              | Ecosystem structure   | 1.33     | 0.18           |
|              | Ecosystem function    | 1.15     | 0.25           |
|              | Ecosystem composition | 0.52     | 0.60           |
| Removal      | Average               | 0.09     | 0.93           |
|              | Ecosystem structure   | 0.39     | 0.70           |
|              | Ecosystem function    | -0.79    | 0.43           |
|              | Ecosystem composition | -1.12    | 0.26           |

**Supplementary Table 5.** Egger regression result. *P* value was extracted based on two-side test

|              | Ecosystem measure     | F-statistic | DF   | <i>P</i> value |
|--------------|-----------------------|-------------|------|----------------|
| Encroachment | Average               | 5.297       | 2676 | 0.02           |
|              | Ecosystem structure   | 2.32        | 343  | 0.13           |
|              | Ecosystem function    | 23.30       | 1855 | 1.503e-06      |
|              | Ecosystem composition | 0.26        | 390  | 0.61           |
| Removal      | Average               | 0.53        | 8189 | 0.47           |
|              | Ecosystem structure   | 399.30      | 3799 | < 2.2e-16      |
|              | Ecosystem function    | 23.38       | 2499 | 1.411e-06      |
|              | Ecosystem composition | 4.14        | 1793 | 0.04           |

**Supplementary Table 6.** Trim and fill test. *P* value was extracted based on two-side test

|              | Ecosystem measure     | Number of studies | Missing studies | <i>P</i> value |
|--------------|-----------------------|-------------------|-----------------|----------------|
| Encroachment | Average               | 2678              | 0               | 0.25           |
|              | Ecosystem structure   | 345               | 0               | 0.50           |
|              | Ecosystem function    | 1858              | 1               | 0.25           |
|              | Ecosystem composition | 395               | 3               | 0.06           |
| Removal      | Average               | 8200              | 0               | 0.50           |
|              | Ecosystem structure   | 3801              | 0               | 0.50           |
|              | Ecosystem function    | 2509              | 8               | 0.002          |
|              | Ecosystem composition | 1795              | 0               | 0.50           |

**Supplementary Table 7.** Random forest for examining the relative importance of plant traits on encroachment and removal impact in Figure 3C. %IncMSE is explained variance. Response variable with not enough data to conduct random forest for either encroachment or removal database were not included. *P* value was extracted based on two-side test

|         | Response variables (LnRR) | Plant traits      | %IncMSE | <i>P</i> value |
|---------|---------------------------|-------------------|---------|----------------|
| Removal | Carbon stocks             | Roots             | 22.72   | 0.01           |
| Removal | Carbon stocks             | Plant height      | 14.90   | 0.03           |
| Removal | Carbon stocks             | Allelopathy       | 14.54   | 0.01           |
| Removal | Carbon stocks             | Palatability      | 14.42   | 0.01           |
| Removal | Carbon stocks             | Deciduousness     | 13.73   | 0.11           |
| Removal | Carbon stocks             | Ground contact    | 13.23   | 0.01           |
| Removal | Carbon stocks             | Canopy shape      | 8.59    | 0.23           |
| Removal | Carbon stocks             | Resprout          | 7.94    | 0.18           |
| Removal | Carbon stocks             | Nitrogen fixation | 6.29    | 0.11           |
| Removal | Soil stability            | Nitrogen fixation | 28.92   | 0.01           |
| Removal | Soil stability            | Plant height      | 25.60   | 0.03           |
| Removal | Soil stability            | Allelopathy       | 25.01   | 0.02           |
| Removal | Soil stability            | Roots             | 22.51   | 0.02           |
| Removal | Soil stability            | Resprout          | 21.44   | 0.02           |
| Removal | Soil stability            | Deciduousness     | 16.05   | 0.21           |
| Removal | Soil stability            | Canopy shape      | 14.83   | 0.26           |
| Removal | Soil stability            | Ground contact    | 14.69   | 0.35           |
| Removal | Soil stability            | Palatability      | 4.43    | 0.68           |
| Removal | Soil hydrology            | Plant height      | 32.19   | 0.01           |
| Removal | Soil hydrology            | Nitrogen fixation | 22.14   | 0.21           |
| Removal | Soil hydrology            | Allelopathy       | 20.12   | 0.22           |
| Removal | Soil hydrology            | Roots             | 15.94   | 0.51           |
| Removal | Soil hydrology            | Deciduousness     | 11.84   | 0.07           |
| Removal | Soil hydrology            | Palatability      | 9.54    | 0.77           |
| Removal | Soil hydrology            | Resprout          | 9.12    | 0.61           |
| Removal | Soil hydrology            | Ground contact    | 7.13    | 0.91           |
| Removal | Soil hydrology            | Canopy shape      | 5.91    | 0.99           |
| Removal | Soil fertility            | Plant height      | 30.97   | 0.01           |
| Removal | Soil fertility            | Palatability      | 24.47   | 0.01           |
| Removal | Soil fertility            | Roots             | 24.33   | 0.01           |
| Removal | Soil fertility            | Allelopathy       | 22.43   | 0.01           |
| Removal | Soil fertility            | Canopy shape      | 16.69   | 0.05           |
| Removal | Soil fertility            | Deciduousness     | 14.32   | 0.02           |
| Removal | Soil fertility            | Nitrogen fixation | 14.00   | 0.02           |
| Removal | Soil fertility            | Resprout          | 13.75   | 0.02           |
| Removal | Soil fertility            | Ground contact    | 11.35   | 0.03           |
| Removal | Non-woody biomass         | Plant height      | 51.82   | 0.01           |



|         |                     |                   |       |      |
|---------|---------------------|-------------------|-------|------|
| Removal | Non-woody biomass   | Allelopathy       | 39.07 | 0.01 |
| Removal | Non-woody biomass   | Canopy shape      | 38.84 | 0.01 |
| Removal | Non-woody biomass   | Deciduousness     | 31.14 | 0.01 |
| Removal | Non-woody biomass   | Roots             | 30.47 | 0.01 |
| Removal | Non-woody biomass   | Palatability      | 25.36 | 0.01 |
| Removal | Non-woody biomass   | Resprout          | 24.23 | 0.01 |
| Removal | Non-woody biomass   | Ground contact    | 20.87 | 0.01 |
| Removal | Non-woody biomass   | Nitrogen fixation | 9.26  | 0.14 |
| Removal | Plant diversity     | Plant height      | 56.01 | 0.01 |
| Removal | Plant diversity     | Roots             | 33.23 | 0.01 |
| Removal | Plant diversity     | Palatability      | 31.96 | 0.01 |
| Removal | Plant diversity     | Deciduousness     | 31.70 | 0.01 |
| Removal | Plant diversity     | Canopy shape      | 25.42 | 0.01 |
| Removal | Plant diversity     | Allelopathy       | 21.80 | 0.01 |
| Removal | Plant diversity     | Nitrogen fixation | 21.37 | 0.01 |
| Removal | Plant diversity     | Ground contact    | 18.38 | 0.01 |
| Removal | Plant diversity     | Resprout          | 16.58 | 0.01 |
| Removal | Microbial diversity | Ground contact    | 13.92 | 0.01 |
| Removal | Microbial diversity | Plant height      | 13.78 | 0.09 |
| Removal | Microbial diversity | Deciduousness     | 7.44  | 0.16 |
| Removal | Microbial diversity | Resprout          | 6.95  | 0.83 |
| Removal | Microbial diversity | Palatability      | 6.51  | 0.22 |
| Removal | Microbial diversity | Allelopathy       | 6.17  | 0.76 |
| Removal | Microbial diversity | Roots             | 5.38  | 0.25 |
| Removal | Microbial diversity | Canopy shape      | 5.09  | 0.74 |
| Removal | Microbial diversity | Nitrogen fixation | 4.16  | 0.76 |
| Removal | Animal diversity    | Plant height      | 41.61 | 0.01 |
| Removal | Animal diversity    | Roots             | 39.41 | 0.01 |
| Removal | Animal diversity    | Deciduousness     | 37.42 | 0.01 |
| Removal | Animal diversity    | Canopy shape      | 33.86 | 0.01 |
| Removal | Animal diversity    | Palatability      | 31.06 | 0.01 |
| Removal | Animal diversity    | Resprout          | 27.54 | 0.01 |
| Removal | Animal diversity    | Nitrogen fixation | 26.30 | 0.01 |
| Removal | Animal diversity    | Allelopathy       | 21.31 | 0.06 |
| Removal | Animal diversity    | Ground contact    | 18.87 | 0.01 |
| Removal | Litter cover        | Plant height      | 29.59 | 0.01 |
| Removal | Litter cover        | Deciduousness     | 27.41 | 0.01 |
| Removal | Litter cover        | Roots             | 21.40 | 0.01 |
| Removal | Litter cover        | Palatability      | 18.86 | 0.02 |
| Removal | Litter cover        | Allelopathy       | 18.72 | 0.02 |
| Removal | Litter cover        | Ground contact    | 14.85 | 0.04 |
| Removal | Litter cover        | Resprout          | 13.86 | 0.01 |
| Removal | Litter cover        | Canopy shape      | 13.06 | 0.32 |
| Removal | Litter cover        | Nitrogen fixation | 11.90 | 0.08 |

|              |                   |                   |       |      |
|--------------|-------------------|-------------------|-------|------|
| Encroachment | Carbon stocks     | Plant height      | 37.76 | 0.03 |
| Encroachment | Carbon stocks     | Ground contact    | 32.61 | 0.01 |
| Encroachment | Carbon stocks     | Deciduousness     | 31.19 | 0.05 |
| Encroachment | Carbon stocks     | Resprout          | 30.26 | 0.02 |
| Encroachment | Carbon stocks     | Roots             | 28.79 | 0.03 |
| Encroachment | Carbon stocks     | Nitrogen fixation | 28.30 | 0.02 |
| Encroachment | Carbon stocks     | Palatability      | 26.19 | 0.01 |
| Encroachment | Carbon stocks     | Allelopathy       | 22.87 | 0.18 |
| Encroachment | Carbon stocks     | Canopy shape      | 21.24 | 0.28 |
| Encroachment | Soil stability    | Canopy shape      | 23.33 | 0.01 |
| Encroachment | Soil stability    | Plant height      | 20.26 | 0.01 |
| Encroachment | Soil stability    | Palatability      | 19.86 | 0.01 |
| Encroachment | Soil stability    | Allelopathy       | 16.29 | 0.05 |
| Encroachment | Soil stability    | Roots             | 13.61 | 0.09 |
| Encroachment | Soil stability    | Ground contact    | 13.17 | 0.20 |
| Encroachment | Soil stability    | Nitrogen fixation | 7.31  | 0.24 |
| Encroachment | Soil stability    | Resprout          | 3.40  | 0.65 |
| Encroachment | Soil stability    | Deciduousness     | 0.00  | 0.51 |
| Encroachment | Soil hydrology    | Plant height      | 29.45 | 0.06 |
| Encroachment | Soil hydrology    | Palatability      | 21.72 | 0.24 |
| Encroachment | Soil hydrology    | Resprout          | 18.72 | 0.18 |
| Encroachment | Soil hydrology    | Ground contact    | 17.34 | 0.21 |
| Encroachment | Soil hydrology    | Canopy shape      | 17.19 | 0.18 |
| Encroachment | Soil hydrology    | Deciduousness     | 15.69 | 0.30 |
| Encroachment | Soil hydrology    | Allelopathy       | 14.91 | 0.28 |
| Encroachment | Soil hydrology    | Nitrogen fixation | 5.66  | 0.12 |
| Encroachment | Soil hydrology    | Roots             | 4.44  | 0.74 |
| Encroachment | Soil fertility    | Plant height      | 28.76 | 0.01 |
| Encroachment | Soil fertility    | Deciduousness     | 24.89 | 0.01 |
| Encroachment | Soil fertility    | Allelopathy       | 23.88 | 0.01 |
| Encroachment | Soil fertility    | Roots             | 23.70 | 0.01 |
| Encroachment | Soil fertility    | Nitrogen fixation | 18.73 | 0.03 |
| Encroachment | Soil fertility    | Palatability      | 17.71 | 0.01 |
| Encroachment | Soil fertility    | Ground contact    | 14.89 | 0.01 |
| Encroachment | Soil fertility    | Resprout          | 14.70 | 0.05 |
| Encroachment | Soil fertility    | Canopy shape      | 14.46 | 0.05 |
| Encroachment | Non-woody biomass | Allelopathy       | 19.65 | 0.01 |
| Encroachment | Non-woody biomass | Plant height      | 15.83 | 0.05 |
| Encroachment | Non-woody biomass | Nitrogen fixation | 14.64 | 0.02 |
| Encroachment | Non-woody biomass | Palatability      | 9.07  | 0.35 |
| Encroachment | Non-woody biomass | Roots             | 8.90  | 0.50 |
| Encroachment | Non-woody biomass | Canopy shape      | 8.82  | 0.44 |
| Encroachment | Non-woody biomass | Deciduousness     | 7.45  | 0.68 |
| Encroachment | Non-woody biomass | Ground contact    | 0.00  | 1.00 |

|              |                     |                   |       |      |
|--------------|---------------------|-------------------|-------|------|
| Encroachment | Non-woody biomass   | Resprout          | 0.00  | 1.00 |
| Encroachment | Plant diversity     | Plant height      | 31.65 | 0.01 |
| Encroachment | Plant diversity     | Deciduousness     | 20.22 | 0.24 |
| Encroachment | Plant diversity     | Roots             | 19.64 | 0.27 |
| Encroachment | Plant diversity     | Canopy shape      | 19.37 | 0.02 |
| Encroachment | Plant diversity     | Nitrogen fixation | 16.11 | 0.50 |
| Encroachment | Plant diversity     | Palatability      | 13.89 | 0.38 |
| Encroachment | Plant diversity     | Allelopathy       | 13.72 | 0.20 |
| Encroachment | Plant diversity     | Ground contact    | 12.58 | 0.49 |
| Encroachment | Plant diversity     | Resprout          | 3.09  | 0.13 |
| Encroachment | Microbial diversity | Plant height      | 17.93 | 0.02 |
| Encroachment | Microbial diversity | Nitrogen fixation | 13.23 | 0.01 |
| Encroachment | Microbial diversity | Roots             | 11.99 | 0.01 |
| Encroachment | Microbial diversity | Ground contact    | 10.73 | 0.01 |
| Encroachment | Microbial diversity | Canopy shape      | 10.03 | 0.25 |
| Encroachment | Microbial diversity | Deciduousness     | 0.00  | 1.00 |
| Encroachment | Microbial diversity | Palatability      | 0.00  | 1.00 |
| Encroachment | Microbial diversity | Allelopathy       | 0.00  | 1.00 |
| Encroachment | Microbial diversity | Resprout          | 0.00  | 1.00 |
| Encroachment | Animal diversity    | Canopy shape      | 14.72 | 0.79 |
| Encroachment | Animal diversity    | Resprout          | 13.88 | 0.59 |
| Encroachment | Animal diversity    | Ground contact    | 12.88 | 0.94 |
| Encroachment | Animal diversity    | Plant height      | 12.19 | 0.82 |
| Encroachment | Animal diversity    | Allelopathy       | 10.66 | 1.00 |
| Encroachment | Animal diversity    | Deciduousness     | 9.91  | 0.97 |
| Encroachment | Animal diversity    | Roots             | 9.49  | 0.97 |
| Encroachment | Animal diversity    | Nitrogen fixation | 9.23  | 0.93 |
| Encroachment | Animal diversity    | Palatability      | 8.88  | 0.96 |
| Encroachment | Litter cover        | Allelopathy       | 13.60 | 0.06 |
| Encroachment | Litter cover        | Roots             | 13.10 | 0.02 |
| Encroachment | Litter cover        | Ground contact    | 8.66  | 0.36 |
| Encroachment | Litter cover        | Canopy shape      | 6.77  | 0.28 |
| Encroachment | Litter cover        | Plant height      | 4.52  | 0.76 |
| Encroachment | Litter cover        | Nitrogen fixation | 2.11  | 0.92 |
| Encroachment | Litter cover        | Palatability      | 1.33  | 0.78 |
| Encroachment | Litter cover        | Deciduousness     | 0.71  | 0.76 |
| Encroachment | Litter cover        | Resprout          | 0.00  | 1.00 |

**Supplementary Table 8.** Model comparison between Model 1 (linear):  $\text{LnRR} \sim x$  and Model 2 (polynomial):  $\text{LnRR} \sim \text{poly}(x, 2)$ . Difference is the Model 1 minus AIC of Model 2 and value are bold if  $\leq 2$  (20 out of 35) which indicate Model 1 is better, otherwise Model 2 is selected to fit the data. Response variable without sufficient data (less than 60) did not fit regression model. *P* value was extracted based on two-side test.

| Response variable | Independent variable | AIC_linear | AIC_poly | Difference   | N    |
|-------------------|----------------------|------------|----------|--------------|------|
| Animal diversity  | Woody cover          | 403.43     | 397.55   | 5.88         | 176  |
| Bareground cover  | Woody cover          | 178.03     | 150.87   | 27.16        | 98   |
| Biocrust cover    | Woody cover          | 35.98      | 37.94    | <b>-1.97</b> | 33   |
| Carbon stocks     | Woody cover          | 179.27     | 165.23   | 14.04        | 147  |
| Litter cover      | Woody cover          | 108.99     | 110.93   | <b>-1.94</b> | 88   |
| Non-woody biomass | Woody cover          | 1495.88    | 1496.51  | <b>-0.64</b> | 547  |
| Non-woody cover   | Woody cover          | 1562.79    | 1563.32  | <b>-0.53</b> | 603  |
| Non-woody density | Woody cover          | 809.85     | 809.99   | <b>-0.14</b> | 284  |
| Plant diversity   | Woody cover          | 458.60     | 456.75   | <b>1.85</b>  | 309  |
| Soil fertility    | Woody cover          | 198.18     | 195.31   | 2.87         | 123  |
| Woody biomass     | Woody cover          | 431.14     | 429.39   | <b>1.74</b>  | 136  |
| Woody cover       | Woody cover          | 1359.04    | 1357.78  | <b>1.26</b>  | 421  |
| Woody density     | Woody cover          | 391.07     | 392.73   | <b>-1.66</b> | 131  |
| Composition       | Woody cover          | 1011.00    | 1013.00  | <b>-2.00</b> | 525  |
| Function          | Woody cover          | 4009.00    | 3956.00  | 53.00        | 1515 |
| Structure         | Woody cover          | 5913.00    | 5912.00  | <b>1.00</b>  | 1928 |
| Animal diversity  | Time                 | 1940.56    | 1928.35  | 12.21        | 759  |
| Bareground cover  | Time                 | 390.38     | 383.86   | 6.52         | 149  |
| Biocrust cover    | Time                 | 154.99     | 155.02   | <b>-0.03</b> | 70   |
| Carbon stocks     | Time                 | 297.14     | 294.50   | 2.64         | 252  |
| Litter cover      | Time                 | 275.20     | 276.93   | <b>-1.73</b> | 141  |
| Non-woody biomass | Time                 | 2553.09    | 2555.09  | <b>-2.00</b> | 871  |
| Non-woody cover   | Time                 | 2206.11    | 2195.63  | 10.48        | 890  |
| Non-woody density | Time                 | 1350.50    | 1350.71  | <b>-0.21</b> | 477  |
| Plant diversity   | Time                 | 1705.11    | 1705.02  | <b>0.09</b>  | 1154 |
| Soil fertility    | Time                 | 670.92     | 670.85   | <b>0.07</b>  | 357  |
| Soil hydrology    | Time                 | 402.63     | 404.61   | <b>-1.98</b> | 174  |
| Soil stability    | Time                 | 394.89     | 388.56   | 6.33         | 145  |
| Woody biomass     | Time                 | 797.18     | 791.28   | 5.90         | 230  |
| Woody cover       | Time                 | 2737.55    | 2739.49  | <b>-1.94</b> | 826  |
| Woody density     | Time                 | 1352.75    | 1349.06  | 3.68         | 420  |
| Composition       | Time                 | 4110.00    | 4102.00  | 8.00         | 1973 |
| Function          | Time                 | 8868.00    | 8864.00  | 4.00         | 3132 |
| Structure         | Time                 | 12185.00   | 12187.00 | <b>-2.00</b> | 4034 |

**Supplementary Table 9.** Summary of linear and polynomial regression between ecosystem response to removal (ecosystem structure, function and composition, and ecological attributes) and initial woody cover or time since removal [ $\log_e(x+1)$  transformed]. Model structure for each response variable was determined by AIC difference in Table S7 ( $\leq 2$ , linear structure,  $> 2$  polynomial structure). Coefficient is the estimate, SE is standardized error, t value and significance P value, poly (...) 1 and poly (...) 2 indicate polynomial 1 (first order) and 2 (second order), respectively. Significance is based on  $P < 0.05$  (two-side test). Ecological attributes with insufficient data ( $\leq 60$ ) were not included to fit regression.

| Response variable (LnRR) | term                              | Coefficient | SE   | t value | P value |
|--------------------------|-----------------------------------|-------------|------|---------|---------|
| Biocrust cover           | Woody cover                       | 0.00        | 0.01 | 0.69    | 0.50    |
| Litter cover             | Woody cover                       | 0.00        | 0.00 | -0.95   | 0.34    |
| Non-woody biomass        | Woody cover                       | 0.00        | 0.00 | 0.47    | 0.64    |
| Non-woody cover          | Woody cover                       | 0.00        | 0.00 | -1.34   | 0.18    |
| Non-woody density        | Woody cover                       | -0.01       | 0.01 | -1.12   | 0.27    |
| Plant diversity          | Woody cover                       | 0.00        | 0.00 | -0.21   | 0.83    |
| Woody biomass            | Woody cover                       | 0.01        | 0.01 | 0.98    | 0.33    |
| Woody cover              | Woody cover                       | 0.00        | 0.00 | 0.64    | 0.52    |
| Woody density            | Woody cover                       | 0.01        | 0.00 | 2.44    | 0.02    |
| Composition              | Woody cover                       | 0.00        | 0.00 | -1.48   | 0.14    |
| Structure                | Woody cover                       | 0.00        | 0.00 | -1.16   | 0.25    |
| Animal diversity         | poly(woody_cover, 2, raw = TRUE)1 | 0.02        | 0.01 | 2.50    | 0.01    |
| Animal diversity         | poly(woody_cover, 2, raw = TRUE)2 | 0.00        | 0.00 | -2.82   | 0.01    |
| Bareground cover         | poly(woody_cover, 2, raw = TRUE)1 | 0.05        | 0.01 | 4.29    | 0.00    |
| Bareground cover         | poly(woody_cover, 2, raw = TRUE)2 | 0.00        | 0.00 | -5.74   | 0.00    |
| Carbon stocks            | poly(woody_cover, 2, raw = TRUE)1 | 0.02        | 0.01 | 3.25    | 0.00    |
| Carbon stocks            | poly(woody_cover, 2, raw = TRUE)2 | 0.00        | 0.00 | -4.07   | 0.00    |
| Soil fertility           | poly(woody_cover, 2, raw = TRUE)1 | 0.01        | 0.01 | 1.18    | 0.24    |
| Soil fertility           | poly(woody_cover, 2, raw = TRUE)2 | 0.00        | 0.00 | -2.20   | 0.03    |
| Function                 | poly(woody_cover, 2, raw = TRUE)1 | 0.02        | 0.00 | 6.57    | 0.00    |
| Function                 | poly(woody_cover, 2, raw = TRUE)2 | 0.00        | 0.00 | -7.47   | 0.00    |
| Biocrust cover           | Time                              | -0.28       | 0.13 | -2.13   | 0.04    |
| Litter cover             | Time                              | 0.03        | 0.08 | 0.45    | 0.65    |
| Non-woody biomass        | Time                              | -0.07       | 0.06 | -1.18   | 0.24    |
| Non-woody density        | Time                              | 0.09        | 0.07 | 1.22    | 0.22    |
| Plant diversity          | Time                              | -0.02       | 0.02 | -0.69   | 0.49    |
| Soil fertility           | Time                              | 0.04        | 0.03 | 1.16    | 0.25    |
| Soil hydrology           | Time                              | 0.12        | 0.08 | 1.49    | 0.14    |
| Woody cover              | Time                              | 0.26        | 0.07 | 3.92    | 0.00    |
| Structure                | Time                              | 0.06        | 0.02 | 2.51    | 0.01    |
| Animal diversity         | poly(log_time, 2, raw = TRUE)1    | 0.81        | 0.17 | 4.70    | 0.00    |
| Animal diversity         | poly(log_time, 2, raw = TRUE)2    | -0.18       | 0.05 | -3.78   | 0.00    |

|                  |                                |       |      |       |      |
|------------------|--------------------------------|-------|------|-------|------|
| Bareground cover | poly(log_time, 2, raw = TRUE)1 | -1.46 | 0.45 | -3.26 | 0.00 |
| Bareground cover | poly(log_time, 2, raw = TRUE)2 | 0.38  | 0.13 | 2.93  | 0.00 |
| Carbon stocks    | poly(log_time, 2, raw = TRUE)1 | 0.37  | 0.13 | 2.77  | 0.01 |
| Carbon stocks    | poly(log_time, 2, raw = TRUE)2 | -0.08 | 0.04 | -2.15 | 0.03 |
| Non-woody cover  | poly(log_time, 2, raw = TRUE)1 | 0.65  | 0.17 | 3.74  | 0.00 |
| Non-woody cover  | poly(log_time, 2, raw = TRUE)2 | -0.18 | 0.05 | -3.54 | 0.00 |
| Soil stability   | poly(log_time, 2, raw = TRUE)1 | 1.58  | 0.68 | 2.34  | 0.02 |
| Soil stability   | poly(log_time, 2, raw = TRUE)2 | -0.46 | 0.16 | -2.90 | 0.00 |
| Woody biomass    | poly(log_time, 2, raw = TRUE)1 | -1.90 | 0.67 | -2.86 | 0.00 |
| Woody biomass    | poly(log_time, 2, raw = TRUE)2 | 0.61  | 0.22 | 2.82  | 0.01 |
| Woody density    | poly(log_time, 2, raw = TRUE)1 | 0.61  | 0.28 | 2.15  | 0.03 |
| Woody density    | poly(log_time, 2, raw = TRUE)2 | -0.18 | 0.07 | -2.38 | 0.02 |
| Composition      | poly(log_time, 2, raw = TRUE)1 | 0.31  | 0.08 | 3.79  | 0.00 |
| Composition      | poly(log_time, 2, raw = TRUE)2 | -0.07 | 0.02 | -3.17 | 0.00 |
| Function         | poly(log_time, 2, raw = TRUE)1 | -0.25 | 0.09 | -2.76 | 0.01 |
| Function         | poly(log_time, 2, raw = TRUE)2 | 0.06  | 0.03 | 2.33  | 0.02 |

---

**Supplementary Table 10.** Random forest for selecting plant traits to include in SEM for explaining removal impact. Random Forest analysis was conducted on the whole removal database that contained available data for all predictors (particularly encroachment stages, removal time) included in the Structural Equation Modelling. %IncMSE is explained variance. Drivers were ranked by their explained variance and elected attributes were bold in text. *P* value was extracted based on two-side test.

| Plant traits         | %IncMSE | P value |
|----------------------|---------|---------|
| <b>Plant height</b>  | 34.538  | 0.010   |
| <b>Canopy shape</b>  | 26.759  | 0.010   |
| <b>Deciduousness</b> | 25.715  | 0.010   |
| <b>Resprout</b>      | 22.791  | 0.010   |
| <b>Root type</b>     | 21.475  | 0.010   |
| Palatability         | 19.875  | 0.010   |
| Nitrogen fixation    | 17.458  | 0.020   |
| Allelopathy          | 14.021  | 0.010   |
| Ground contact       | 13.903  | 0.010   |

## **Appendix S1. Detailed background information on the procedure for selecting relevant studies**

We carefully examined every paper that was suitable for including in our quantitative analysis to ensure that the meta-analysis database was comprehensive and objective. Papers were only included in our database if they met the following *a priori criteria*: (i) the study was conducted under natural field conditions (greenhouse or growth chamber studies, as well as studies using cultivated plants, were not considered), (ii) the results were quantitative and therefore analysable, and (iii) the variables were collected strictly in plots encroached and without woody vegetation for the woody plant encroachment studies or in plot with woody plant removed and woody plant retained for the woody plant removal studies located in the same geographical area (hereafter encroached and removed plots as treatment, plots without woody plant and woody retained plots as control). This allowed us to be certain that any effects observed at each study could be attributed to the effects of encroachment or removal, and not to variation in climatic or soil type between the treatment and control plots. (iv) studies were included when the impacts resulted only from woody plant encroachment/invasion or woody plant removal rather than the invasion or removal of other plant species. In some studies, many exotic plant species rather than only woody species was invaded in the ecosystem or all the understorey vegetation was removed instead of only removing woody plants, so these studies were excluded; (v) studies were included only if the reported data were representative of whole grassland and encroached plots for encroachment studies and were representative of land that dominated by woody plants and removed plots. Studies that evaluated the effects of woody vegetation or without woody plant on the response variables considered at the microsite level (e.g. comparing the effects of shrub vs. grass canopies on vegetation or soil attributes within the same site) were not considered.

For woody plant removal database, studies with shared controls (multiple treatments with one control) were included only if these treatments were conducted in the same



geographical area and during the same period. Studies comparing before and after treatment with no specific control treatment were not regarded as paired and were therefore excluded from the database. For example, for woody plant encroachment database, most, but not all, of these data represented encroachment scenarios. A small number represented naturally-occurring areas of dense shrubland (e.g. the Succulent Karoo in Southern Africa; Todd & Hoffman 1999) and these were compared with shrub-free, generally grass-dominant sites. While not all of these grassland–shrubland plots were strictly cross-fence comparisons i.e. they did not always occur immediately adjacent to each other, they were always within a few kilometers away, and therefore represented two different ends of the woody encroachment–grassland continuum. Many of the studies reported results from only a single encroached-grassland plot at the same site and therefore lacked measurement errors.

## **Appendix S2. List of literature for compiling the woody plant encroachment and woody plant removal database**

### **List of 216 papers for compiling the woody plant encroachment database.**

1. Abrahams, A.D., Parsons A.J. & Wainwright J. (1994). Resistance to overland flow on semiarid grassland and shrubland hillslopes, Walnut Gulch, southern Arizona. *J. Hydrol.*, 156, 431-446.
2. Aguiar, M.R., Paruelo J.M., Sala O.E. & Lauenroth W.K. (1996). Ecosystem responses to changes in plant functional type composition: An example from the Patagonian steppe *J. Veg. Sci.*, 381-390.
3. Angassa, A. & Baars R.M.T. (2000). Ecological condition of encroached and non-encroached rangelands in Borana, Ethiopia. *Afr. J. Ecol.*, 38, 321-328.
4. Angassa, A. (2002). The effect of clearing bushes and shrubs on range condition in Borana, Ethiopia. *Trop. Grassl.*, 36, 69-76.
5. Angassa, A., Sheleme, B., Oba, G., Treydte, A., Linstädter, A. & Sauerborn, J. (2012). Savanna land use and its effect on soil characteristics in southern Ethiopia. *Journal of Arid Environments*, 81, 67-76.
6. Archer, S. (1995). Tree-grass dynamics in a Prosopis-thornscrub savanna parkland: Reconstructing the past and predicting the future. *Ecoscience*, 2, 83-99.
7. Archer, S., Boutton T.W. & Hibbard K.A. (2001). Trees in grasslands: biogeochemical consequences of woody plant expansion. In: *Global biogeochemical cycles in the climate systems* (eds. Schulze, M., Heimann S., Harrison E., Holland J., Lloyd I., Prentice C. & Schimel D.). Academic Press, San Diego, California, pp. 115-130.
8. Archer, S.R., Throop H.L., Browning D.M. & Predick K. (2009). Does woody plant encroachment increase ecosystem carbon stocks? In: *Biogeochemistry: Linking Community Structure and Ecosystem Function*. 94th ESA Annual Meeting Albuquerque, New Mexico, pp. 46-59.
9. Asner, G.P., Archer S., Hughes R.F., Ansley R.J. & Wessman C.A. (2003). Net changes in regional woody vegetation cover and carbon storage in Texas Drylands, 1937-1999. *Glob. Change Biol.*, 9, 316-335.
10. Ayres, D., Melville G., Bean J., Beckers D., Ellis M., Mazzer T. & Freudenberger D. (2001). *Woody weeds, biodiversity and landscape function in Western New South Wales*. WEST 2000, Dubbo, Australia. pp. 221.
11. Bai, Y.G., Colberg T., Romo J.T., McConkey B., Pennock D. & Farrell R. (2009). Does expansion of western snowberry enhance ecosystem carbon sequestration and storage in Canadian Prairies? *Agric. Ecosyst. Environ.*, 134, 269-276.
12. Baker, D., Miles, R. & Eldershaw, V. (1992). Vegetation Cover Classes and Soil Nutrient Status of the Mulga Lands of South-West Queensland. *The Rangeland Journal*, 14, 40-48.
13. Barbosa da Silva, F. H., Arieira, J., Parolin, P., Cátia Nunes da, C., & Junk, W. J. (2016). Shrub encroachment influences herbaceous communities in flooded

- grasslands of a neotropical savanna wetland. *Applied Vegetation Science*, 19(3), 391-400. doi: <http://dx.doi.org/10.1111/avsc.12230>
14. Barnes, P.W. & Archer S. (1999). Tree-shrub interactions in a subtropical savanna parkland: Competition or facilitation? *J. Veg. Sci.*, 10, 525-536.
  15. Bateman, J. B., & Vitousek, P. M. (2018). Soil fertility response to *Ulex europaeus* invasion and restoration efforts. *Biological Invasions*, 20(10), 2777-2791. doi: 10.1007/s10530-018-1729-9
  16. Beeskow, A.M., Elissalde N.O. & Rostagno C.M. (1995). Ecosystem changes associated with grazing intensity on the Punta-Ninfas rangelands of Patagonia, Argentina. *J. Range Manag.*, 48, 517-522.
  17. Belay, T.A., Totland, Ø. & Moe, S.R. (2013). Ecosystem responses to woody plant encroachment in a semiarid savanna rangeland. *Plant ecology*, 214, 1211-1222.
  18. Belsky, A.J. (1994). Influences of trees on savanna productivity-tests of shade, nutrients, and tree-grass competition. *Ecology*, 75, 922-932.
  19. Benschahar, R. (1992). The effects of bush clearance of African ungulates in a semiarid nature reserve. *Ecol. Appl.*, 2, 95-101.
  20. Bestelmeyer, B.T. (2005). Does desertification diminish biodiversity? Enhancement of ant diversity by shrub invasion in south-western USA. *Divers. Distrib.*, 11, 45-55.
  21. Bestelmeyer, B.T., Kalil N.I. & Peters D.P.C. (2007). Does shrub invasion indirectly limit grass establishment via seedling herbivory? A test at grassland-shrubland ecotones. *J. Veg. Sci.*, 18, 363-370.
  22. Bhark, E.W. & Small E.E. (2003). Association between plant canopies and the spatial patterns of infiltration in shrubland and grassland of the Chihuahuan Desert, New Mexico. *Ecosystems*, 6, 185-196.
  23. Biederman, L.A. & Boutton T.W. (2009). Biodiversity and trophic structure of soil nematode communities are altered following woody plant invasion of grassland. *Soil Biol. Biochem.*, 41, 1943-1950.
  24. Blaser, W. J., Shanungu, G. K., Edwards, P. J., & Venterink, H. O. (2014). Woody encroachment reduces nutrient limitation and promotes soil carbon sequestration. *Ecology and Evolution*, 4(8), 1423-1438. doi: 10.1002/ece3.1024
  25. Blaum, N., Rossmanith E., Popp A. & Jeltsch F. (2007). Shrub encroachment affects mammalian carnivore abundance and species richness in semiarid rangelands. *Acta Oecologia*, 31, 86-92.
  26. Blaum, N., Seymour, C., Rossmanith, E., Schwager, M. & Jeltsch, F. (2009). Changes in arthropod diversity along a land use driven gradient of shrub cover in savanna rangelands: identification of suitable indicators. *Biodiversity and Conservation*, 18, 1187-1199.
  27. Boelman, N.T., Gough, L., Wingfield, J., Goetz, S. & Guay, K.C. (2015). Greater shrub dominance alters breeding habitat and food resources for migratory songbirds in Alaskan arctic tundra. *Global Change Biology*, 21, 1508-1520.
  28. Bollard, K., O'Feeke, P., Oliver, I. & Shelly, D. (2010). 'Baseline establishment for vegetation condition performance monitoring in the central west CMA region:

- autumn 2010 sampling program.' (Central West Catchment Management Authority: Armidale, NSW).
29. Boscutti, F., Pellegrini, E., Casolo, V., de Nobili, M., Buccheri, M., & Alberti, G. (2020). Cascading effects from plant to soil elucidate how the invasive *Amorpha fruticosa* L. impacts dry grasslands. *Journal of Vegetation Science*, 31(4), 667-677. doi: 10.1111/jvs.12879
  30. Boutton, T.W., Archer S.R., Midwood A.J., Zitzer S.F. & Bol R. (1998). Delta C-13 values of soil organic carbon and their use in documenting vegetation change in a subtropical savanna ecosystem. *Geoderma*, 82, 5-41.
  31. Brantley, S.T. & Young, D.R. (2010). Shrub expansion stimulates soil C and N storage along a coastal soil chronosequence. *Global Change Biology*, 16, 2052-2061.
  32. Briggs, J.M., Knapp A.K., Blair J.M., Heisler J.L., Hoch G.A., Lett M.S. & McCarron J.K. (2005). An ecosystem in transition. Causes and consequences of the conversion of mesic grassland to shrubland. *Bioscience*, 55, 243-254.
  33. Brown, J. & Archer, S. (1989). Woody plant invasion of grasslands: establishment of honey mesquite (*Prosopis glandulosa* var. *glandulosa*) on sites differing in herbaceous biomass and grazing history. *Oecologia*, 80, 19-26.
  34. Burkinshaw, A.M. & Bork E.W. (2009). Shrub encroachment impacts the potential for multiple use conflicts on public land. *Environ. Manag.*, 44, 493-504.
  35. Cable, J.M., Ogle K., Tyler A.P., Pavao-Zuckerman M.A. & Huxman T.E. (2009). Woody plant encroachment impacts on soil carbon and microbial processes: results from a hierarchical Bayesian analysis of soil incubation data. *Plant Soil*, 320, 153-167.
  36. Cabral, A.C., De Miguel J.M., Rescia A.J., Schmitz M.F. & Pineda F.D. (2003). Shrub encroachment in Argentinean savannas. *Journal of Vegetation Science*, 14, 145-152.
  37. Cao, C.Y., Jiang D.M., Teng X.H., Jiang Y., Liang W.J. & Cui Z.B. (2008). Soil chemical and microbiological properties along a chronosequence of *Caragana microphylla* Lam. plantations in the Horqin sandy land of Northeast China. *Appl. Soil Ecol.*, 40, 78-85.
  38. Castellano, M.J. & Valone T.J. (2006). Effects of livestock removal and perennial grass recovery on the lizards of a desertified arid grassland. *J. Arid Environ.*, 66, 87-95.
  39. Castro, H. & Freitas H. (2009). Above-ground biomass and productivity in the Montado: From herbaceous to shrub dominated communities. *J. Arid Environ.*, 73, 506-511.
  40. Chapman, R.N., Engle D.M., Masters R.E. & Leslie D.M. (2004). Tree invasion constrains the influence of herbaceous structure in grassland bird habitats. *Ecoscience*, 11, 55-63.
  41. Cheng, X., An S., Chen J., Li B., Liu Y. & Liu S. (2007). Spatial relationships among species, above-ground biomass, N, and P in degraded grasslands in Ordos Plateau, northwestern China. *J. Arid Environ.*, 68, 652-667.

42. Cheng, X.L., An S.Q., Liu S.R. & Li G.Q. (2004). Micro-scale spatial heterogeneity and the loss of carbon, nitrogen and phosphorus in degraded grassland in Ordos Plateau, northwestern China. *Plant Soil*, 259, 29-37.
43. Chiti, T., Mihindou, V., Jeffery, K. J., Malhi, Y., De Oliveira, F. L., White, L. J. T., & Valentini, R. (2017). Impact of woody encroachment on soil organic carbon storage in the Lope National Park, Gabon. *Biotropica*, 49(1), 9-12. doi: 10.1111/btp.12369
44. Colberg, T.J. (2007). Relationships between plant communities and soil carbon in the prairie ecozone of Saskatchewan. PhD thesis, University of Saskatchewan, Saskatoon.
45. Connin, S.L., Virginia R.A. & Chamberlain C.P. (1997). Carbon isotopes reveal soil organic matter dynamics following arid land shrub expansion. *Oecologia*, 110, 374-386.
46. Coppedge, B.R., Engle D.M., Masters R.E. & Gregory M.S. (2001). Avian response to landscape change in fragmented southern Great Plains grasslands. *Ecol. Appl.*, 11, 47-59.
47. Creamer, C. A., Filley, T. R., Boutton, T. W., & Rowe, H. I. (2016). Grassland to woodland transitions: Dynamic response of microbial community structure and carbon use patterns. *Journal of Geophysical Research-Biogeosciences*, 121(6), 1675-1688. doi: 10.1002/2016jg003347
48. Cubera, E. & Moreno G. (2007). Effect of land-use on soil water dynamic in dehesas of Central-Western Spain. *CATENA*, 71, 298-308.
49. Dahl, R., Dalgaard, T., & Bork, E. W. (2020). Shrub Encroachment Following Wetland Creation in Mixedgrass Prairie Alters Grassland Vegetation and Soil. *Environmental Management*, 66(6), 1120-1132. doi: 10.1007/s00267-020-01386-2
50. Dalle, G., Maass B.L. & Isselstein J. (2006). Encroachment of woody plants and its impact on pastoral livestock production in the Borana lowlands, southern Oromia, Ethiopia. *Afr. J. Ecol.*, 44, 237-246.
51. Darrouzet-Nardi, A., D'Antonio C.M. & Berlow E.L. (2008). Effects of young *Artemisia rothrockii* shrubs on soil moisture, soil nitrogen cycling, and resident herbs. *J. Veg. Sci.*, 19, 23-30.
52. Delgado Balbuena, J., Arredondo Moreno, J.T., Huber-Sannwald, E. & Chávez Aguilar, G. (2013). Differences in plant cover and species composition of semiarid grassland communities of central Mexico and its effects on net ecosystem exchange.
53. DiMarco, R.R. (1987). Effects of harvester ants nests on soil properties and vegetation. Masters thesis, New Mexico State University, NM.
54. Ding, L., Wang, P., Zhang, W., Zhang, Y., Li, S., Wei, X., . . . Yang, F. (2019). Shrub Encroachment Shapes Soil Nutrient Concentration, Stoichiometry and Carbon Storage in an Abandoned Subalpine Grassland. *Sustainability*, 11(6). doi: 10.3390/su11061732

55. Doerr, V., Doerr, E., McIntyre, S., Stol, J., Davies, M., Drew, A. et al. (2009). Managing invasive native scrublands for improved biodiversity outcomes in agricultural landscapes. Final scientific report, June 2009. CSIRO, Canberra.
56. Dong, X.W., Zhang X.K., Bao X.L. & Wang J.K. (2009). Spatial distribution of soil nutrients after the establishment of sand-fixing shrubs on sand dune. *Plant Soil Environ.*, 55, 288-294.
57. Dougill, A.J., Heathwaite A.L. & Thomas D.S.G. (1998). Soil water movement and nutrient cycling in semi-arid rangeland: vegetation change and system resilience. *Hydrol. Process.*, 12, 443-459.
58. Ebbs & Throop (2008). Spatial patterns of soil organic carbon and total nitrogen in mesquite coppic dunes. Abstract. In: *Undergraduate research scholars program presentation*, New Mexico State University, Las Cruces, NM.
59. Eggemeyer, K.D., Awada T., Harvey F.E., Wedin D.A., Zhou X. & Zanner C.W. (2009). Seasonal changes in depth of water uptake for encroaching trees *Juniperus virginiana* and *Pinus ponderosa* and two dominant C<sub>4</sub> grasses in a semiarid grassland. *Tree Physiol.*, 29, 157-169.
60. Eldridge, D. (2002). Condition and biodiversity of vegetation remnants in the Murrumbidgee Irrigation Area: a baseline study and recommendations for future management. Murrumbidgee Irrigation, Griffith, pp. 61.
61. Eldridge, D.J., Wang, L. & Ruiz-Colmenero, M. (2015). Shrub encroachment alters the spatial patterns of infiltration. *Ecohydrology*, 8, 83-93.
62. Eldridge, D.J., Whitford W.G. & Duval B.D. (2009). Animal disturbances promote shrub maintenance in a desertified grassland. *J. Ecol.*, 97, 1302-1310.
63. Eldridge et al. (unpublished)
64. Eshete, A., Treydte, A. C., Hailemariam, M., Solomon, N., Dejene, T., Yilma, Z., & Birhane, E. (2020). Variations in soil properties and native woody plant species abundance under *Prosopis juliflora* invasion in Afar grazing lands, Ethiopia. *Ecological Processes*, 9(1). doi: 10.1186/s13717-020-00240-x
65. Evrendilek, F., Celik I. & Kilic S. (2004). Changes in soil organic carbon and other physical soil properties along adjacent Mediterranean forest, grassland, and cropland ecosystems. *J. Arid Environ.*, 59, 743-752.
66. Fierro, L.C., Gomez F., Gonzalez M.H. & Chavez A. (1986). The use of goats to increase forage and animal production in brush infested rangelands of Northern Mexico. In: *Rangelands: A Resource Under Siege: Proceedings of the Second International Rangeland Congress* (eds. Joss, P. J., Lynch P. W. & Williams O. B.). Cambridge University Press, London, pp. 254-255.
67. Frank, A.B. & Karn J.E. (2005). Shrub effects on carbon dioxide and water vapor fluxes over grasslands. *Rangeland Ecol. Manag.*, 58, 20-26.
68. French, K. & Major R.E. (2001). Effect of an exotic *Acacia* (Fabaceae) on ant assemblages in South African fynbos. *Austral. Ecol.*, 26, 303-310.
69. Germano, D.J., Hungerford R. & Martin S.C. (1983). Responses of selected wildlife species to the removal of Mesquite from desert grassland. *J. Range Manag.*, 36, 309-311.

70. Gibbens, R.P., Hicks R.A. & Dugas W.A. (1996). Structure and function of C<sub>3</sub> and C<sub>4</sub> Chihuahuan Desert plant communities. Standing crop and leaf area index. *J. Arid Environ.*, 34, 47-62.
71. Gill, R.A. & Burke I.C. (1999). Ecosystem consequences of plant life form changes at three sites in the semiarid United States. *Oecologia*, 121, 551-563.
72. Gómez-Rey, M.X., Madeira, M., Gonzalez-Prieto, S.J. & Coutinho, J. (2013). Soil C and N dynamics in a Mediterranean oak woodland with shrub encroachment. *Plant and soil*, 371, 339-354.
73. González-Roglich, M., Swenson, J. J., Jobbágy, E. G., & Jackson, R. B. (2014). Shifting carbon pools along a plant cover gradient in woody encroached savannas of central Argentina. *Forest Ecology and Management*, 331, 71-78. doi: 10.1016/j.foreco.2014.07.035
74. Good, M.K., Price, J.N., Clarke, P. & Reid, N. (2011). Densely regenerating coolibah (*Eucalyptus coolabah*) woodlands are more species-rich than surrounding derived grasslands in floodplains of eastern Australia. *Australian Journal of Botany*, 59, 468-479.
75. Görzen, E., Borisova, K., Fenesi, A., Ruprecht, E., & Donath, T. W. (2019). Effects of woody species encroachment and fire on vegetation and the soil seed bank in dry grasslands of Transylvania. *Applied Vegetation Science*, 22(3), 409-422. doi: 10.1111/avsc.12435
76. Grant, T.A., Madden E. & Berkey G.B. (2004). Tree and shrub invasion in northern mixed-grass prairie: implications for breeding grassland birds. *Wildl. Soc. Bull.*, 32, 807-818.
77. Guidi, C., Vesterdal, L., Gianelle, D., & Rodeghiero, M. (2014). Changes in soil organic carbon and nitrogen following forest expansion on grassland in the Southern Alps. *Forest Ecology and Management*, 328, 103-116. doi: 10.1016/j.foreco.2014.05.025
78. Hagos, M.G. & Smit G.N. (2005). Soil enrichment by *Acacia mellifera* subsp. *detinens* on nutrient poor sandy soil in a semi-arid southern African savanna. *J. Arid Environ.*, 61, 47-59.
79. Haubensak, K.A. & Parker I.M. (2004). Soil changes accompanying invasion of the exotic shrub *Cytisus scoparius* in glacial outwash prairies of western Washington USA. *Plant Ecol.*, 175, 71-79.
80. Havstad, K.M., Gibbens R.P., Knorr C.A. & Murray L.W. (1999). Long-term influences of shrub removal and lagomorph exclusion on Chihuahuan Desert vegetation dynamics. *J. Arid Environ.*, 42, 155-166.
81. Hernandez, L., Romero A.G., Laundre J.W., Lightfoot D., Aragon E. & Portillo J.L. (2005). Changes in rodent community structure in the Chihuahuan Desert Mexico: comparisons between two habitats. *J. Arid Environ.*, 60, 239-257.
82. Herrick, J.E., Havstad, K.M., Gibbens, R.P. (1997). Changes in soil factors following 56 years of shrub removal and lagomorph exclusion. *Bull. Ecol. Soc. Am.*, 78, 258.
83. Hibbard, K.A. (1995). Landscape patterns of carbon and nitrogen dynamics in a subtropical savanna: observations and models. Texas A & M University.

84. Hibbard, K.A., Archer S., Schimel D.S. & Valentine D.W. (2001). Biogeochemical changes accompanying woody plant encroachment in a subtropical savanna. *Ecology*, 82, 1999-2011.
85. Ho, J., & Chambers, L. G. (2019). Altered soil microbial community composition and function in two shrub encroached marshes with different physicochemical gradients. *Soil Biology & Biochemistry*, 130, 122-131. doi: 10.1016/j.soilbio.2018.12.004
86. Ho, J., & Chambers, L. G. (2020). Willow-shrub encroachment affects physicochemical properties differently in two subtropical freshwater marshes. *Wetlands Ecology and Management*, 28(2), 389-395. doi: 10.1007/s11273-019-09705-z
87. Hobbs, R.J. & Mooney H.A. (1986). Community changes following shrub invasion of grassland. *Oecologia*, 70, 508-513.
88. Hoch, G.A., Briggs J.M. & Johnson L.C. (2002). Assessing the rate, mechanisms, and consequences of the conversion of tallgrass prairie to *Juniperus virginiana* forest. *Ecosystems*, 5, 726-726.
89. Hu, X., Li, X. Y., Zhao, Y., Gao, Z., & Zhao, S. J. (2021). Changes in soil microbial community during shrub encroachment process in the Inner Mongolia grassland of northern China. *CATENA*, 202. doi: 10.1016/j.catena.2021.105230
90. Hudak, A.T., Wessman C.A. & Seastedt T.R. (2003). Woody overstorey effects on soil carbon and nitrogen pools in South African savanna. *Austral Ecol.*, 28, 173-181.
91. Huenneke, L.F., Anderson J.P., Remmenga M. & Schlesinger W.H. (2002). Desertification alters patterns of aboveground net primary production in Chihuahuan ecosystems. *Glob. Change Biol.*, 8, 247-264.
92. Hughes, R.F., Archer S.R., Asner G.P., Wessman C.A., McMurtry C., Nelson J. & Ansley R.J. (2006). Changes in aboveground primary production and carbon and nitrogen pools accompanying woody plant encroachment in a temperate savanna. *Glob. Change Biol.*, 12, 1733-1747.
93. Jackson, R.B., Banner J.L., Jobbagy E.G., Pockman W.T. & Wall D.H. (2002). Ecosystem carbon loss with woody plant invasion of grasslands. *Nature*, 418, 623-626.
94. Jurena, P.N. & Archer S. (2003). Woody plant establishment and spatial heterogeneity in grasslands. *Ecology*, 84, 907-919.
95. Kakembo, V. (2009). Vegetation patchiness and implications for landscape function: The case of *Pteronia incana* invader species in Ngqushwa Rural Municipality, Eastern Cape, South Africa. *Catena*, 77, 180-186.
96. Kakembo, V., Rowntree K. & Palmer A.R. (2007). Topographic controls on the invasion of *Pteronia incana* (Blue bush) onto hillslopes in Ngqushwa (formerly Peddie) district, Eastern Cape, South Africa. *CATENA*, 70, 185-199.
97. Kaphengst, T. & Ward D. (2008). Effects of habitat structure and shrub encroachment on bird species diversity in arid savanna in Northern Cape province, South Africa. *Ostrich*, 79, 133-140.



98. Karakosta, C.C. & Papanastasis V. (2007). Changes in biomass in relation to shrub cover in semi-arid Mediterranean rangelands. In: *Permanent and Temporary Grassland. Plant Environment Economy*. European Grassland Federation, Belgium, pp. 122-125.
99. Kazmaier, R.T., Hellgren E.C. & Ruthven D.C. (2001). Habitat selection by the Texas tortoise in a managed thornscrub ecosystem. *J. Wildl. Manag.*, 65, 653-660.
100. Kerley, G.I.H. & Whitford W.G. (2000). Impact of grazing and desertification in the Chihuahuan Desert: Plant communities, granivores and granivory. *Am. Midl. Nat.*, 144, 78-91.
101. Kerr, T. F., & Ruwanza, S. (2016). Does Eucalyptus grandis invasion and removal affect soils and vegetation in the Eastern Cape Province, South Africa? *Austral Ecology*, 41(3), 328-338. doi: 10.1111/aec.12315
102. Kieft, T.L., White C.S., Loftin S.R., Aguilar R., Craig J.A. & Skaar D.A. (1998). Temporal dynamics in soil carbon and nitrogen resources at a grassland-shrubland ecotone. *Ecology*, 79, 671-683.
103. King, J.A. & Campbell B.M. (1994). Soil organic matter relations in five land cover types in the miombo region (Zimbabwe). *For. Ecol. Manag.*, 67, 225-239.
104. Klemmedson, J.O. & Tiedemann A.R. (2000). Influence of western juniper development on distribution of soil and organic layer nutrients. *Northwest. Sci.*, 74, 1-11.
105. Knapp, A.K., Briggs J.M., Collins S.L., Archer S.R., Bret-Harte M.S., Ewers B.E., et al. (2008). Shrub encroachment in North American grasslands: shifts in growth form dominance rapidly alters control of ecosystem carbon inputs. *Glob. Change Biol.*, 14, 615-623.
106. Knapp, A.K., Briggs, J.M., Collins, S.L., Archer, S.R., BRET-HARTE, M.S., Ewers, B.E. et al. (2008). Shrub encroachment in North American grasslands: shifts in growth form dominance rapidly alters control of ecosystem carbon inputs. *Global Change Biology*, 14, 615-623.
107. Knopf, F.L. (1994). Avian assemblages on altered grasslands *Studies in Avian Biology*, 15, 247-257.
108. Koch, B., Edwards, P. J., Blanckenhorn, W. U., Walter, T., & Hofer, G. (2015). Shrub encroachment affects the diversity of plants, butterflies, and grasshoppers on two Swiss subalpine pastures. *Arctic Antarctic and Alpine Research*, 47(2), 345-357. doi: 10.1657/aaar0013-093
109. Kochy, M. & Wilson S.D. (2004). Semiarid grassland responses to short-term variation in water availability. *Plant Ecol.*, 174, 197-203.
110. Krannitz, P.G. (2007). Abundance and diversity of shrub-steppe birds in relation to encroachment of ponderosa pine. *Wilson J. Ornithol.*, 119, 655-664.
111. Kyriazopoulos, A., Abraham, E., Parissi, Z., Korakis, G., Manousidis, T., Chrisovelidou, K. et al. (2012). Effects of juniper encroachment on herbage production and biodiversity in a natural grassland: preliminary results. *Options Méditerranéennes, Series A*, 102, 299-302.

112. Lara-Romero, C., García, C., Morente-López, J., & Iriondo, J. M. (2016). Direct and indirect effects of shrub encroachment on alpine grasslands mediated by plant–flower visitor interactions. *Functional Ecology*, 30(9), 1521-1530. doi: 10.1111/1365-2435.12637
113. Lechmere-Oertel, R.G., Cowling R.M. & Kerley G.I.H. (2005). Landscape dysfunction and reduced spatial heterogeneity in soil resources and fertility in semi-arid succulent thicket, South Africa. *Austral Ecol.*, 30, 615-624.
114. Lechmere-Oertel, R.G., Cowling, R.M. & Kerley, G.I. (2005). Landscape dysfunction and reduced spatial heterogeneity in soil resources and fertility in semi-arid succulent thicket, South Africa. *Austral Ecology*, 30, 615-624.
115. Leitner, M., Davies, A. B., Parr, C. L., Eggleton, P., & Robertson, M. P. (2018). Woody encroachment slows decomposition and termite activity in an African savanna. *Global Change Biology*, 24(6), 2597-2606. doi: 10.1111/gcb.14118
116. Lett, M.S. & Knapp A.K. (2003). Consequences of shrub expansion in mesic grassland: Resource alterations and graminoid responses. *J. Veg. Sci.*, 14, 487-496.
117. Lett, M.S., Knapp A.K., Briggs J.M. & Blair J.M. (2004). Influence of shrub encroachment on aboveground net primary productivity and carbon and nitrogen pools in a mesic grassland. *Can. J. Bot.*, 82, 1363-1370.
118. Liang, Y., Han G., Zhou H., Zhao M., Snyman H.A., Shan D. & Havstad K.M. (2009). Grazing intensity on vegetation dynamics of a typical steppe in northeast Inner Mongolia. *Rangeland Ecol. Manag.*, 62, 328-336.
119. Liao, J., Boutton, T. & Jastrow, J. (2006). Storage and dynamics of carbon and nitrogen in soil physical fractions following woody plant invasion of grassland. *Soil Biology and Biochemistry*, 38, 3184-3196.
120. Liao, J.D. & Boutton T.W. (2008). Soil microbial biomass response to woody plant invasion of grassland. *Soil Biol. Biochem.*, 40, 1207-1216.
121. Liao, J.D., Boutton T.W. & Jastrow J.D. (2006). Organic matter turnover in soil physical fractions following woody plant invasion of grassland: Evidence from natural <sup>13</sup>C and <sup>15</sup>N. *Soil Biol. Biochem.*, 38, 3197-3210.
122. Lloyd, J., Mannan R.W., Destefano S. & Kirkpatrick C. (1998). The effects of mesquite invasion on a southeastern Arizona grassland bird community. *Wilson Bull.*, 110, 403-408.
123. Lynch, L. M., Machmuller, M. B., Cotrufo, M. F., Paul, E. A., & Wallenstein, M. D. (2018). Tracking the fate of fresh carbon in the Arctic tundra: Will shrub expansion alter responses of soil organic matter to warming? *Soil Biology & Biochemistry*, 120, 134-144. doi: 10.1016/j.soilbio.2018.02.002
124. Maestre, F.T., Bowker M.A., Puche M.D., Hinojosa M.B., Martinez I., Garcia-Palacios P., *et al.* (2009). Shrub encroachment can reverse desertification in semi-arid Mediterranean grasslands. *Ecol. Lett.*, 12, 930-941.
125. Marin, A.I., Hernandez L. & Laundre J.W. (2003). Predation risk and food quantity in the selection of habitat by black-tailed jackrabbit (*Lepus californicus*): an optimal foraging approach. *J. Arid Environ.*, 55, 101-110.

126. Martí-Roura, M., Casals, P. & Romanyà, J. (2011). Temporal changes in soil organic C under Mediterranean shrublands and grasslands: impact of fire and drought. *Plant and soil*, 338, 289-300.
127. Mata-Gonzalez, R., Figueroa-Sandoval B., Clemente F. & Manzano M. (2007). Vegetation changes after livestock grazing exclusion and shrub control in the southern Chihuahuan Desert. *West. N. Am. Nat.*, 67, 63-70.
128. Mathis, V.L., Whitford W.G., Kay F.R. & Alkon P.U. (2006). Effects of grazing and shrub removal on small mammal populations in southern New Mexico, USA. *J. Arid Environ.*, 66, 76-86.
129. Maurer, B.A. (1985). Avian community dynamics in desert grasslands-observational scale and hierarchical structure. *Ecol. Monogr.*, 55, 295-312.
130. McCarron, J.K., Knapp A. & Blair J.M. (2003). Soil C and N responses to woody plant expansion in a mesic grassland. *Plant Soil*, 257, 183-192.
131. McCulley, R.L. (1998). Soil respiration and microbial biomass in a savanna parkland landscape: spatio-temporal variation and environmental controls. Texas A&M University.
132. McCulley, R.L., Archer S.R., Boutton T.W., Hons F.M. & Zuberer D.A. (2004). Soil respiration and nutrient cycling in wooded communities developing in grassland. *Ecology*, 85, 2804-2817.
133. McHenry, M.T., Wilson B.R., Lemon J.M., Donnelly D.E. & Grown I.G. (2006). Soil and vegetation response to thinning White Cypress Pine (*Callitris glaucophylla*) on the north western slopes of New South Wales, Australia. *Plant Soil*, 285, 245-255.
134. McKinley, D.C. & Blair J.M. (2008). Woody plant encroachment by *Juniperus virginiana* in a mesic native grassland promotes rapid carbon and nitrogen accrual. *Ecosystems*, 11, 454-468.
135. McKinley, D.C., Rice C.W. & Blair J.M. (2008). Conversion of grassland to coniferous woodland has limited effects on soil nitrogen cycle processes. *Soil Biol. Biochem.*, 40, 2627-2633.
136. McPherson, G.R., Boutton T.W. & Midwood A.J. (1993). Stable carbon isotopy analysis of soil organic matter illustrates vegetation change at the grassland woodland boundary in southeastern Arizona, USA. *Oecologia*, 93, 95-101.
137. Meik, J.M., Jeo R.M., Mendelson J.R. & Jenks K.E. (2002). Effects of bush encroachment on an assemblage of diurnal lizard species in central Namibia. *Biol. Conserv.*, 106, 29-36.
138. Millard, P., Midwood, A.J., Hunt, J.E., Whitehead, D. & Boutton, T.W. (2008). Partitioning soil surface CO<sub>2</sub> efflux into autotrophic and heterotrophic components, using natural gradients in soil  $\delta^{13}\text{C}$  in an undisturbed savannah soil. *Soil Biology and Biochemistry*, 40, 1575-1582.
139. Miller, R.F., Svejcar T.J. & Rose J.A. (2000). Impacts of western juniper on plant community composition and structure. *J. Range Manag.*, 53, 574-585.

140. Mills, A.J. & Cowling R.M. (2009). Below-ground carbon stocks in intact and transformed subtropical thicket landscapes in semi-arid South Africa. *J. Arid Environ.*, 74, 93-100.
141. Moreno, G. & Obrador J.J. (2007). Effects of trees and understorey management on soil fertility and nutritional status of holm oaks in Spanish dehesas *Nutr. Cycl. Agroecosyst.*, 78, 253-264.
142. Moreno-de las Heras, M., Díaz-Sierra, R., Turnbull, L. & Wainwright, J. (2015). Assessing vegetation structure and ANPP dynamics in a grassland-shrubland Chihuahuan ecotone using NDVI-rainfall relationships. *Biogeosciences discussions.*, 12, 51-92.
143. Muldavin, E.H., Moore D.I., Collins S.L., Wetherill K.R. & Lightfoot D.C. (2008). Aboveground net primary production dynamics in a northern Chihuahuan Desert ecosystem. *Oecologia*, 155, 123-132.
144. Muñoz-Robles, C., Reid, N., Tighe, M., Briggs, S. & Wilson, B. (2011). Soil hydrological and erosional responses in areas of woody encroachment, pasture and woodland in semi-arid Australia. *Journal of Arid Environments*, 75, 936-945.
145. Munoz-Robles, C., Reid, N., Tighe, M., Briggs, S., Wilson, B. & Frazier, P. (2011). Runoff and erosion in woody encroachment, pasture and woodland vegetation in semi-arid New South Wales, Australia.
146. Mureva, A., Chivenge, P., & Ward, D. (2021). Soil organic carbon and nitrogen in soil physical fractions in woody encroached grassland in South African savannas. *Soil Research*. doi: 10.1071/sr20245
147. Mureva, A., Ward, D., Pillay, T., Chivenge, P., & Cramer, M. (2018). Soil Organic Carbon Increases in Semi-Arid Regions while it Decreases in Humid Regions Due to Woody-Plant Encroachment of Grasslands in South Africa. *Scientific Reports*, 8. doi: 10.1038/s41598-018-33701-7
148. Nadal-Romero, E., Otal-Lain, I., Lasanta, T., Sanchez-Navarrete, P., Errea, P., & Cammeraat, E. (2018). Woody encroachment and soil carbon stocks in subalpine areas in the Central Spanish Pyrenees. *Science of the Total Environment*, 636, 727-736. doi: 10.1016/j.scitotenv.2018.04.324
149. Neff, J.C., Barger N.N., Baisden W.T., Fernandez D.P. & Asner G.P. (2009). Soil carbon storage responses to expanding pinyon-juniper populations in southern Utah. *Ecol. Appl.*, 19, 1405-1416.
150. Norris, M.D., Blair J.M. & Johnson L.C. (2007). Altered ecosystem nitrogen dynamics as a consequence of land cover change in tallgrass prairie. *Am. Midl. Nat.*, 158, 432-445.
151. Oelofse, M., Birch-Thomsen, T., Magid, J., de Neergaard, A., van Deventer, R., Bruun, S., & Hill, T. (2016). The impact of black wattle encroachment of indigenous grasslands on soil carbon, Eastern Cape, South Africa. *Biological Invasions*, 18(2), 445-456. doi: 10.1007/s10530-015-1017-x
152. Oliver, I.O. (undated). The Pilliga biodiversity study. Unpublished data, Department of Land and Water Conservation, Armidale, NSW.
153. Parizek, B., Rostagno C.M. & Sottini R. (2002). Soil erosion as affected by shrub encroachment in northeastern Patagonia. *J. Range Manag.*, 55, 43-48.

154. Pei, S.F., Fu H., Wan C.G., Chen Y.M. & Sosebee R.E. (2006). Observations on changes in soil properties in grazed and nongrazed areas of Alxa Desert steppe, Inner Mongolia. *Arid Land Res. Manag.*, 20, 161-175.
155. Peng, H., Li, X. & Tong, S. (2014). Effects of shrub (*Caragana microphalla* Lam.) encroachment on water redistribution and utilization in the typical steppe of Inner Mongolia. *Acta Ecologica Sinica*, 34, 2256-2265.
156. Peng, H.-Y., Li, X.-Y., Li, G.-Y., Zhang, Z.-H., Zhang, S.-Y., Li, L. et al. (2013). Shrub encroachment with increasing anthropogenic disturbance in the semiarid Inner Mongolian grasslands of China. *Catena*, 109, 39-48.
157. Puttock, A., Dungait, J.A., Macleod, C.J., Bol, R. & Brazier, R.E. (2014). Woody plant encroachment into grasslands leads to accelerated erosion of previously stable organic carbon from dryland soils. *Journal of Geophysical Research: Biogeosciences*, 119, 2345-2357.
158. Qiao, L., Zou, C. B., Stebler, E., & Will, R. E. (2017). Woody plant encroachment reduces annual runoff and shifts runoff mechanisms in the tallgrass prairie, USA. *Water Resources Research*, 53(6), 4838-4849. doi: 10.1002/2016wr019951
159. Quero, J.L., Maestre, F.T., Ochoa, V., García-Gómez, M. & Delgado-Baquerizo, M. (2013). On the importance of shrub encroachment by sprouters, climate, species richness and anthropic factors for ecosystem multifunctionality in semi-arid Mediterranean ecosystems. *Ecosystems*, 16, 1248-1261.
160. Randriamalala, J. R., Radosy, H. O., Razanaka, S., Randriambanona, H., & Hervé, D. (2016). Effects of goat grazing and woody charcoal production on xerophytic thickets of southwestern Madagascar. *Journal of Arid Environments*, 128, 65-72. doi: 10.1016/j.jaridenv.2016.01.002
161. Rau, B., Tausch, R., Reiner, A., Johnson, D., Chambers, J. & Blank, R. (2012). Developing a model framework for predicting effects of woody expansion and fire on ecosystem carbon and nitrogen in a pinyon–juniper woodland. *Journal of arid environments*, 76, 97-104.
162. Reich, P.B., Peterson D.W., Wedin D.A. & Wrage K. (2001). Fire and vegetation effects on productivity and nitrogen cycling across a forest-grassland continuum. *Ecology*, 82, 1703-1719.
163. Reyes-Reyes, G., Baron-Ocampo L., Cualí-Alvarez I., Frias-Hernandez J.T., Olalde-Portugal V., Fregoso L.V. & Dendooven L. (2002). C and N dynamics in soil from the central highlands of Mexico as affected by mesquite (*Prosopis* spp.) and huizache (*Acacia tortuosa*): a laboratory investigation. *Appl. Soil Ecol.*, 19, 27-34.
164. Rivest, D., Rolo, V., López-Díaz, L. & Moreno, G. (2011). Shrub encroachment in Mediterranean silvopastoral systems: *Retama sphaerocarpa* and *Cistus ladanifer* induce contrasting effects on pasture and *Quercus ilex* production. *Agriculture, ecosystems & environment*, 141, 447-454.
165. Roberts, C. & Allen Jones J. (2000). Soil patchiness in juniper-sagebrush-grass communities of central Oregon. *Plant Soil*, 223, 45-61.

166. Rolo, V. & Moreno, G. (2012). Interspecific competition induces asymmetrical rooting profile adjustments in shrub-encroached open oak woodlands. *Trees*, 26, 997-1006.
167. Rolo, V., López-Díaz, M. & Moreno, G. (2012). Shrubs affect soil nutrients availability with contrasting consequences for pasture understory and tree overstory production and nutrient status in Mediterranean grazed open woodlands. *Nutrient Cycling in Agroecosystems*, 93, 89-102.
168. Rosenstock, S.S. & Van Riper C. (2001). Breeding bird responses to juniper woodland expansion. *J. Range Manag.*, 54, 226-232.
169. Rossatto, D. R., & Rigobelo, E. C. (2016). Tree encroachment into savannas alters soil microbiological and chemical properties facilitating forest expansion. *Journal of Forestry Research*, 27(5), 1047-1054. doi: 10.1007/s11676-016-0219-0
170. Royer, P.D., Breshears, D.D., Zou, C.B., Cobb, N.S. & Kurc, S.A. (2010). Ecohydrological energy inputs in semiarid coniferous gradients: Responses to management-and drought-induced tree reductions. *Forest Ecology and Management*, 260, 1646-1655.
171. San José, J. & Farinas, M. (1991). Temporal changes in the structure of a Trachypogon savanna protected for 25 years. *Acta (Ecologica)*. 1991, 12 (2), 237, 247.
172. Scanlan, J.C. (1986). Influence of the tree basal area on pasture yield and composition. In: *Rangelands: A Resource Under Siege: Proceedings of the Second International Rangeland Congress* (eds. Joss, P. J., Lynch P. W. & Williams O. B.). Cambridge University Press, London, pp. 66-67.
173. Schlesinger, W.H., Tartowski S.L. & Schmidt S.M. (2006). Nutrient cycling within an arid ecosystem. In: *Structure and function of a Chihuahuan Desert ecosystem: the Jornada Basin long-term ecological research site* (eds. Havstad, K. M., Huenneke L. & Schlesinger W. H.). Oxford University Press, New York, pp. 133-149.
174. Schlesinger, W.H., Abrahams A.D., Parsons A.J. & Wainwright J. (1999). Nutrient losses in runoff from grassland and shrubland habitats in Southern New Mexico: I. rainfall simulation experiments. *Biogeochemistry*, 45, 21-34.
175. Scott, R.L., Huxman, T.E., Barron-Gafford, G.A., Darrel Jenerette, G., Young, J.M. & Hamerlynck, E.P. (2014). When vegetation change alters ecosystem water availability. *Global Change Biology*, 20, 2198-2210.
176. Seamster, V.A., Waits, L.P., Macko, S.A. & Shugart, H.H. (2014). Coyote (*Canis latrans*) mammalian prey diet shifts in response to seasonal vegetation change. *Isotopes in environmental and health studies*, 50, 343-360.
177. Sigwela, A.M., Kerley G.I.H., Mills A.J. & Cowling R.M. (2009). The impact of browsing-induced degradation on the reproduction of subtropical thicket canopy shrubs and trees. *S. Afr. J. Bot.*, 75, 262-267.
178. Simpson, L. T., Cherry, J. A., Smith, R. S., & Feller, I. C. (2020). Mangrove Encroachment Alters Decomposition Rate in Saltmarsh Through Changes in Litter Quality. *Ecosystems*. doi: 10.1007/s10021-020-00554-z

179. Smith et al (2009). Conference paper. 94th Annual ESA Meeting, Albuquerque, New Mexico, August 2009.
180. Smith, D.L. & Johnson L. (2004). Vegetation-mediated changes in microclimate reduce soil respiration as woodlands expand into grasslands. *Ecology*, 85, 3348-3361.
181. Smith, D.L. & Johnson L.C. (2003). Expansion of *Juniperus virginiana* L. in the Great Plains: Changes in soil organic carbon dynamics. *Global Biogeochem. Cy.*, 17.
182. Stock, W.D., Wienand K.T. & Baker A.C. (1995). Impacts of invading N<sub>2</sub> fixing *Acacia* species on patterns of nutrient cycling in 2 Cape ecosystems-evidence from soil incubation studies and N<sup>15</sup> natural abundance values. *Oecologia*, 101, 375-382.
183. Tárrega, R., Calvo, L., Taboada, Á., García-Tejero, S. & Marcos, E. (2009). Abandonment and management in Spanish dehesa systems: effects on soil features and plant species richness and composition. *Forest ecology and management*, 257, 731-738.
184. Tausch, R.J., West N.E. & Nabi A.A. (1981). Tree age and dominance patterns in the Great Basin Pinyon juniper woodlands. *J. Range Manag.*, 34, 259-264.
185. Thompson, W.A. & Eldridge D.J. (2005). Plant cover and composition in relation to density of *Callitris glaucophylla* (white cypress pine) along a rainfall gradient in eastern Australia. *Aust. J. Bot.*, 53, 545-554.
186. Throop, H.L. & Archer S.R. (2007). Interrelationships among shrub encroachment, land management, and litter decomposition in a semidesert grassland. *Ecol. Appl.*, 17, 1809-1823.
187. Throop, H.L. & Archer S.R. (2008). Shrub (*Prosopis velutina*) encroachment in a semidesert grassland: spatial-temporal changes in soil organic carbon and nitrogen pools. *Glob. Change Biol.*, 14, 2420-2431.
188. Throop, H.L., Lajtha, K. & Kramer, M. (2013). Density fractionation and <sup>13</sup>C reveal changes in soil carbon following woody encroachment in a desert ecosystem. *Biogeochemistry*, 112, 409-422.
189. Tighe, M., Reid N., Wilson B. & Briggs S.V. (2009). Invasive native scrub and soil condition in semi-arid south-eastern Australia. *Agric. Ecosyst. Environ.*, 132, 212-222.
190. Todd, S.W. & Hoffman M.T. (1999). A fence-line contrast reveals effects of heavy grazing on plant diversity and community composition in Namaqualand, South Africa. *Plant Ecol.*, 142, 169-178.
191. Tölgyesi, C. , Orsi Valkó, D Balázs, Kelemen, A. , & Z Bátori. (2018). Tree-herb co-existence and community assembly in natural forest-steppe transitions. *Plant Ecology & Diversity*. 10.1080/17550874.2018.1544674
192. Turnbull, L., Wainwright J., Brazier R.E. & Bol R. (2010). Biotic and abiotic changes in ecosystem structure over a shrub-encroachment gradient in the southwestern USA. *Ecosystems*, 13, 1239-1255.

- 193.** Urbina, I., Grau, O., Sardans, J., Ninot, J. M., & Penuelas, J. (2020). Encroachment of shrubs into subalpine grasslands in the Pyrenees changes the plant-soil stoichiometry spectrum. *Plant and Soil*, 448(1-2), 37-53. doi: 10.1007/s11104-019-04420-3
- 194.** Utaile, Y. U., Van Geel, M., Muys, B., Cheche, S. S., Helsen, K., & Honnay, O. (2021). Woody encroachment of an East-African savannah ecosystem alters its arbuscular mycorrhizal fungal communities. *Plant and Soil*. doi: 10.1007/s11104-021-04949-2
- 195.** Virginia, R.A., Jarrel W.M., Whitford W.G. & Freckman D.W. (1992). Soil biota and soil properties in the surface rooting zone of mesquite (*Prosopis glandulosa*) in historical and recently desertified Chihuahuan Desert habitats. *Bio. Fert. Soil*, 13, 90-98.
- 196.** Wang, X.P., Brown-Mitic C.M., Kang E.S., Zhang J.G. & Li X.R. (2001). Evapotranspiration of *Caragana Korshinskii* communities in a revegetated desert area: Tenegger Desert. *C. Hydro Process.*, 18, 3293-3303.
- 197.** Wessman, C.A., Archer S., Johnson L. & Asner G.P. (2004). Woodland expansion in US grasslands: assessing land-cover change and biogeochemical impacts. In: *Land Change Science: Observing, Monitoring and Understanding Trajectories of Change on the Earth's Surface* (eds. Gutman, G., Janetos A.C. & Justice C.O.). Kluwer Academic Publishers, Dordrecht, pp. 185-208.
- 198.** Wheeler, C.W., Archer S.R., Asner G.P. & McMurtry C.R. (2007). Climatic/edaphic controls on soil carbon/nitrogen response to shrub encroachment in desert grassland. *Ecol. Appl.*, 17, 1911-1928.
- 199.** Whitford, W.G. & Steinberger Y. (1989). The long-term effects of habitat modification on a desert rodent community. In: *Patterns in the structure of mammalian communities* (eds. Morris, D.W., Abramsky Z., Fox B.J. & Willig M.R.). Special Publications Museum of Texas Tech University, Lubbock, Texas. pp. 34-43.
- 200.** Whitford, W.G. (1976). Temporal fluctuations in density and diversity of desert rodent populations. *J. Mammal.*, 57, 351-369.
- 201.** Wiezik, M., Svitok, M., Wieziková, A. & Dovčiak, M. (2013). Shrub encroachment alters composition and diversity of ant communities in abandoned grasslands of western Carpathians. *Biodiversity and conservation*, 22, 2305-2320.
- 202.** Wilson, S.D. & Kleb H.R. (1996). The influence of prairie and forest vegetation on soil moisture and available nitrogen. *Am. Midl. Nat.*, 136, 222-231.
- 203.** Wilson, T.B. & Thompson T.L. (2005). Soil nutrient distributions of mesquite-dominated desert grasslands: changes in time and space. *Geoderma*, 126, 301-315.
- 204.** Xia, Y., Moore D.I., Collins S.L. & Muldavin E.H. (2010). Aboveground production and species richness of annuals in Chihuahuan Desert grassland and shrubland plant communities. *J. Arid Environ.*, 74, 378-385.
- 205.** Xiang, X., Gibbons, S. M., He, L., Shen, H., & Chu, H. (2019). Proximate grassland and shrub-encroached sites show dramatic restructuring of soil bacterial communities. *PeerJ*. doi: <http://dx.doi.org/10.7717/peerj.7304>



206. Xiang, X., Gibbons, S. M., Li, H., Shen, H., Fang, J., & Chu, H. (2018). Shrub encroachment is associated with changes in soil bacterial community composition in a temperate grassland ecosystem. *Plant and Soil*, 425(1-2), 539-551. doi: 10.1007/s11104-018-3605-x
207. Yando, E. S., Osland, M. J., Willis, J. M., Day, R. H., Krauss, K. W., & Hester, M. W. (2016). Salt marsh-mangrove ecotones: using structural gradients to investigate the effects of woody plant encroachment on plant-soil interactions and ecosystem carbon pools. *Journal of Ecology*, 104(4), 1020-1031. doi: 10.1111/1365-2745.12571
208. Yang, C., Tsedan, G., Liu, Y. & Hou, F. (2020). Shrub coverage alters the rumen bacterial community of yaks (*Bos grunniens*) grazing in alpine meadows. *Journal of Animal Science and Technology*, 62, 504-520.
209. Yang, C., Yan, T., Sun, Y. & Hou, F. (2021). Shrub cover impacts on yak growth performance and herbaceous forage quality on the qinghai-tibet plateau, china. *Rangeland Ecology & Management*, 75, 9-16.
210. Yannarell, A. C., Menning, S. E., & Beck, A. M. (2014). Influence of Shrub Encroachment on the Soil Microbial Community Composition of Remnant Hill Prairies. *Microbial Ecology*, 67(4), 897-906. doi: 10.1007/s00248-014-0369-6
211. Zarovalli, M.P., Yiakoulaki M.D. & Papanastasis V.P. (2007). Effects of shrub encroachment on herbage production and nutritive value in semi-arid Mediterranean grasslands. *Grass Forage Sci.*, 62, 355-363.
212. Zavaleta, E.S. & Kettley L.S. (2006). Ecosystem change along a woody invasion chronosequence in a California grassland. *J. Arid Environ.*, 66, 290-306.
213. Zhang, Y., Shi, F. X., & Mao, R. (2019). *Alnus sibirica* encroachment promotes dissolved organic carbon biodegradation in a boreal peatland. *Science of the Total Environment*, 695. doi: 10.1016/j.scitotenv.2019.133882
214. Zhang, X., Shan, L., Tan, W., & Mao, R. (2020a). Effect of woody plant expansion on decomposition of fine root mixtures in a grass-dominated temperate wetland. *Wetlands Ecology and Management*, 28(1), 191-197. doi: 10.1007/s11273-019-09698-9
215. Zhang, Z. H., Li, X. Y., Yang, X., Shi, Y., Zhang, S. Y., & Jiang, Z. Y. (2020b). Changes in soil properties following shrub encroachment in the semiarid Inner Mongolian grasslands of China. *Soil Science and Plant Nutrition*, 66(2), 369-378. doi: 10.1080/00380768.2019.1706430
216. Zuo, X., Zhao, H., Zhao, X., Guo, Y., Yun, J., Wang, S. et al. (2009). Vegetation pattern variation, soil degradation and their relationship along a grassland desertification gradient in Horqin Sandy Land, northern China. *Environmental geology*, 58, 1227-1237.

## **List of 308 papers for compiling the woody plant removal database.**

---

1. Abella, S. R., Menard, K. S., Schetter, T. A., Sprow, L. A., & Jaeger, J. F. (2020). Rapid and transient changes during 20 years of restoration management in savanna-woodland-prairie habitats threatened by woody plant encroachment. *Plant Ecology*, 221(12), 1201-1217. doi: 10.1007/s11258-020-01075-4
2. Adams, T.E., Jr. & Graves, W.L. (1983) Clipping chaparral as a brush-management technique. *California Agriculture*, 37, 12-14.
3. Adema, E.O., Buschiazzo, D.E., Babinec, F.J., Rucci, T.E. & Hermida, V.F.G. (2004) Mechanical control of shrubs in a semiarid region of Argentina and its effect on soil water content and grassland productivity. *Agricultural Water Management*, 68, 185-194.
4. Alados, C. L., Saiz, H., Nuche, P., Gartzia, M., Komac, B., De Frutos, A., & Pueyo, Y. (2019). Clearing vs. burning for restoring pyrenean grasslands after shrub encroachment. *Cuadernos De Investigacion Geografica*, 45(2), 441-468. doi: 10.18172/cig.3589
5. Alberto Sabattini, R., Alberto Sabattini, J., Carlos Cian, J., & Lindt, M. (2018). Mechanical recovery of a native forest with shrubs of the Espinal Ecoregion (Argentina). *Forestist*, 68(2), 78-86. doi: 10.26650/forestist.2018.392323
6. Alden, R.H. (1971) Increases in streamflow after converting Chaparral to grass. *Water Resources Research*, 7, 71-80.
7. Alemseged, Y., Hacker, R.B., Smith, W.J. & Melville, G.J. (2011) Temporary cropping in semi-arid shrublands increases native perennial grasses. *Rangeland Journal*, 33, 67-78.
8. Allegratti, L.I., Passera, C.B. & Robles, A.B. (1997) Short- and long-term effects of shrub management on vegetation in the Monte, Argentina. *Journal of Arid Environments*, 35, 685-693.
9. Alvarez-Martinez, J., Gomez-Villar, A. & Lasanta, T. (2016) The use of goats grazing to restore pastures invaded by shrubs and avoid desertification: A preliminary case study in the Spanish Cantabrian Mountains. *Land Degradation & Development*, 27, 3-13.
10. Angassa, A. (2002) The effect of clearing bushes and shrubs on range condition in Borana, Ethiopia. *Tropical Grasslands*, 36, 69-76.

11. Angassa, A., Oba, G. & Tolera, A. (2012) Bush encroachment control demonstrations and management implications on herbaceous species in savannas of southern Ethiopia. *Tropical and Subtropical Agroecosystems*, 15, 173-185.
12. Ansley, R. J., Steffens, T. J., Cooper-Norris, C. E., & Zhang, T. (2021). Herbaceous Production and Soil Nitrogen after Mesquite Mortality in Southern Great Plains (US) Grassland. *Rangeland Ecology and Management*, 77, 82-92. doi: 10.1016/j.rama.2021.04.002
13. Ansley, R. J., Zhang, T., & Cooper, C. (2018). Soil Moisture, Grass Production and Mesquite Resprout Architecture Following Mesquite Above-Ground Mortality. *Water*, 10(9). doi: <http://dx.doi.org/10.3390/w10091243>
14. Ansley, R.J. & Castellano, M.J. (2007) Texas wintergrass and buffalograss response to seasonal fires and clipping. *Rangeland Ecology & Management*, 60, 154-164.
15. Ansley, R.J., Boutton, T.W., Mirik, M., Castellano, M.J. & Kramp, B.A. (2010) Restoration of C-4 grasses with seasonal fires in a C-3/C-4 grassland invaded by *Prosopis glandulosa*, a fire-resistant shrub. *Applied Vegetation Science*, 13, 520-530.
16. Ansley, R.J., Pinchak, W.E., Teague, W.R., Kramp, B., Jones, D.L. & Jacoby, P.W. (2004) Long-term grass yields following chemical control of honey mesquite. *Rangeland Ecology & Management*, 57, 49-57.
17. Ansley, R.J., Wiedemann, H.T., Castellano, M.J. & Slosser, J.E. (2006) Herbaceous restoration of juniper dominated grasslands with chaining and fire. *Rangeland Ecology & Management*, 59, 171-178.
18. Arduini, I. & Ercoli, L. (2012) Recovery of understory vegetation in clear-cut stone pine (*Pinus pinea* L.) plantations. *Plant Biosystems*, 146, 244-258.
19. Armas-Herrera, C. M., Marti, C., Badia, D., Ortiz-Perpina, O., Girona-Garcia, A., & Luis Mora, J. (2018). Short-term and midterm evolution of topsoil organic matter and biological properties after prescribed burning for pasture recovery (Tella, Central Pyrenees, Spain). *Land Degradation & Development*, 29(6), 1545-1554. doi: 10.1002/ldr.2937
20. Augustine, D.J. & Milchunas, D.G. (2009) Vegetation responses to prescribed burning of grazed shortgrass steppe. *Rangeland Ecology & Management*, 62, 89-97.

21. Ayala-A, F., Alfonso Ortega-S, J., Fulbright, T.E., Rasmussen, G.A., Drawe, D.L., Synatzske, D.R. & Litt, A.R. (2012) Long-term effects of aeration and fire on invasion of exotic grasses in mixed-brush plant communities. *Rangeland Ecology & Management*, 65, 153-159.
22. Azul, A.M., Castro, P., Sousa, J.P. & Freitas, H. (2009) Diversity and fruiting patterns of ectomycorrhizal and saprobic fungi as indicators of land-use severity in managed woodlands dominated by *Quercus suber* - a case study from southern Portugal. *Canadian Journal of Forest Research/Revue Canadienne de Recherche Forestiere*, 39, 2404-2417.
23. Baba, W. (2003) Changes in the structure and floristic composition of the limestone grasslands after cutting trees and shrubs and mowing. *Acta Societatis Botanicorum Poloniae*, 72, 61-69.
24. Bannister, J. R., Acevedo, M., Galindo, N., Puettmann, K., Salas-Eljatib, C., & Travieso, G. n. (2020). Shrub influences on seedling performance when restoring the slow-growing conifer *Pilgerodendron uviferum* in southern bog forests. *Restoration Ecology*, 28(2), 396-407. doi: <http://dx.doi.org/10.1111/rec.13090>
25. Bar Massada, A., Gabay, O., Perevolotsky, A. & Carmel, Y. (2008) Quantifying the effect of grazing and shrub-clearing on small scale spatial pattern of vegetation. *Landscape ecology*, 23, 327-339.
26. Bates, J.D. (2005) Herbaceous response to cattle grazing following juniper cutting in Oregon. *Rangeland Ecology & Management*, 58, 225-233.
27. Bates, J.D., Davies, K.W. & Sharp, R.N. (2011) Shrub-steppe early succession following Juniper cutting and prescribed fire. *Environmental management*, 47, 468-481.
28. Bates, J.D., Miller, R.F. & Svejcar, T. (2005) Long-term successional trends following western juniper cutting. *Rangeland Ecology & Management*, 58, 533-541.
29. Bates, J.D., Rhodes, E.C., Davies, K.W. & Sharp, R. (2009) Postfire succession in big sagebrush steppe with livestock grazing. *Rangeland Ecology & Management*, 62, 98-110.
30. Bates, J.D., Svejcar, T.S. & Miller, R.F. (2007) Litter decomposition in cut and uncut western juniper woodlands. *Journal of Arid Environments*, 70, 222-236.

31. Bechtold, H.A. & Inouye, R.S. (2007) Distribution of carbon and nitrogen in sagebrush steppe after six years of nitrogen addition and shrub removal. *Journal of Arid Environments*, 71, 122-132.
32. Bedunah, D.J. & Sosebee, R.E. (1984) Forage response of a mesquite-buffalograss community following range rehabilitation. *Journal of Range Management*, 483-487.
33. Bell, F.W., Lautenschlager, R.A., Wagner, R.G., Pitt, D.G., Hawkins, J.W. & Ride, K.R. (1997) Motor-manual, mechanical, and herbicide release affect early successional vegetation in northwestern Ontario. *Forestry Chronicle*, 73 (1), 61-68.
34. Bell, L.A., Fuhlendorf, S.D., Patten, M.A., Wolfe, D.H. & Sherrod, S.K. (2010) Lesser Prairie-Chicken hen and brood habitat use on sand shinnery oak. *Rangeland Ecology & Management*, 63, 478-486.
35. Ben-Shahar, R. (1992) The effects of bush clearance on African ungulates in a semi-arid nature reserve. *Ecological Applications*, 2, 95-101.
36. Berlow, E.L., D'Antonio, C.M. & Swartz, H. (2003) Response of herbs to shrub removal across natural and experimental variation in soil moisture. *Ecological Applications*, 13, 1375-1387.
37. Bernau, C. R., Strand, E. K., & Bunting, S. C. (2018). Fuel bed response to vegetation treatments in juniper-invaded sagebrush steppe. *Fire Ecology*, 14. doi: 10.1186/s42408-018-0002-z
38. Bestelmeyer, B.T., Duniway, M.C., James, D.K., Burkett, L.M., Havstad, K.M. & Suding, K. (2013) A test of critical thresholds and their indicators in a desertification-prone ecosystem: more resilience than we thought. *Ecology Letters*, 16, 339-345.
39. Blanco, L.J., Ferrando, C.A., Biurrun, F.N., Oriente, E.L., Namur, P., Recalde, D.J. & Berone, G.D. (2005) Vegetation responses to roller chopping and buffelgrass seeding in Argentina. *Rangeland Ecology & Management*, 58, 219-224.
40. Boggs, J. F., Lochmiller, R. L., McMurry, S. T., Leslie, D. M. J., & Engle, D. M. (1991). Cuterebra Infestations in Small-Mammal Communities as Influenced by Herbicides and Fire. *Journal of Mammalogy*, 72(2), 322-327.
41. Boggs, J. F., McMurry, S. T., Leslie Jr, D. M., Engle, D. M., & Lochmiller, R. L. (1990). Influence of habitat modification on the intestinal helminth community

- ecology of cottontail rabbit populations. *Journal of wildlife diseases*, 26(2), 157-169.
42. Bohlman, G.N., North, M. & Safford, H.D. (2016) Shrub removal in reforested post-fire areas increases native plant species richness. *Forest Ecology and Management*, 374, 195-210.
  43. Bovey, R.W., Morton, H.L. & Meyer, R.E. (1972) Herbage production following brush control with herbicides in Texas. *Journal of Range Management*, 25, 136-142.
  44. Bowes, G.G. (1982) Changes in the yield of forage following the use of herbicides to control Aspen Poplar *Populus-Tremuloides*. *Journal of Range Management*, 35, 246-248.
  45. Boyd, C.S. & Svejcar, T.J. (2011) The influence of plant removal on succession in Wyoming big sagebrush. *Journal of Arid Environments*, 75, 734-741.
  46. Bozzo, J.A., Beasom, S.L. & Fulbright, T.E. (1992) Vegetation responses to 2 brush management practices in South Texas. *Journal of Range Management*, 45, 170-175.
  47. Bristow, N.A., Weisberg, P.J. & Tausch, R.J. (2014) A 40-year record of tree establishment following chaining and prescribed fire treatments in Singleleaf Pinyon (*Pinus monophylla*) and Utah Juniper (*Juniperus osteosperma*) woodlands. *Rangeland Ecology & Management*, 67, 389-396.
  48. Brock, J.H., Blackburn, W.H. & Haas, R.H. (1982) Infiltration and sediment production on a deep hardland range site in north central Texas USA. *Journal of Range Management*, 35, 195-198.
  49. Brunkow, G., & Fick, W. H. (2017). Control of Roughleaf Dogwood with Tebuthiuron Pellets in Pottawatomie County, Kansas. *Transactions of the Kansas Academy of Science*, 120, 183-186. doi: <http://dx.doi.org/10.1660/062.120.0405>
  50. Buonopane, M., Huenneke, L.F. & Remmenga, M. (2005) Community response to removals of plant functional groups and species from a Chihuahuan Desert shrubland. *Oikos*, 110, 67-80.
  51. Busso, C.A., Montenegro, O.A., Torres, Y.A., Giorgetti, H.D. & Rodriguez, G.D. (2016) Aboveground net primary productivity and cover of vegetation exposed to various disturbances in arid Argentina. *Applied Ecology and Environmental Research*, 14, 51-75.

52. Cable, D.R. (1967) Fire effects on semidesert grasses and shrubs. *Rangeland Ecology & Management*, 20, 170-176.
53. Calleja, J. A., Escolà, M., Forcadell, J. M., Serrano, E., & Carvalho, J. (2019). Cattle Grazing Fails to Control Shrub Encroachment in Mediterranean Landscapes. *Rangeland Ecology & Management*.
54. Campbell, J.W., Hanula, J.L. & Waldrop, T.A. (2008) Effects of prescribed fire and fire surrogates on saproxylic Coleoptera in the southern Appalachians of North Carolina. *Journal of Entomological Science*, 43, 57-75.
55. Campedelli, T., Londi, G., Miniati, G., Cutini, S. & Florenzano, G.T. (2016) Recovering mountain Mediterranean grasslands for breeding birds: ecology and population status shape species responses to management. *Biodiversity and Conservation*, 25, 1695-1710.
56. Canteiro, C., Pinto-Cruz, C., Paula Simoes, M. & Gazarini, L. (2011) Conservation of Mediterranean oak woodlands: understory dynamics under different shrub management. *Agroforestry Systems*, 82, 161-171.
57. Chief, K., Young, M.H. & Shafer, D.S. (2012) Changes in soil structure and hydraulic properties in a wooded-shrubland ecosystem following a prescribed fire. *Soil Science Society of America Journal*, 76, 1965-1977.
58. Christiansen, T.A., Lockwood, J.A. & Powell, J. (1989) Arthropod community dynamics in undisturbed and intensively managed mountain brush habitats. *Great Basin Naturalist*, 49, 570-586.
59. Clary, W.P. (1971) Effects of Utah juniper removal on herbage yields from Springerville soils. *Journal of Range Management*, 373-378.
60. Coffman, J.M., Bestelmeyer, B.T., Kelly, J.F., Wright, T.F. & Schooley, R.L. (2014) Restoration practices have positive effects on breeding bird species of concern in the Chihuahuan Desert. *Restoration Ecology*, 22, 336-344.
61. Collins, Courtney, G., Stajich, Jason, E., Weber, & Soren, E., et al. (2018). Shrub range expansion alters diversity and distribution of soil fungal communities across an alpine elevation gradient. *Molecular Ecology*, 27, 2461-2476.
62. Conard, S.G. & Radosevich, S.R. (1982) Growth responses of white fir *Abies*-*Concolor* to decreased shading and root competition by Montane Chaparral shrubs. *Forest Science*, 28, 309-320.
63. Cooper, S.M., Cathey, J.C., Alford, D.L. & Sieckenius, S.S. (2009) Influence of rainfall, type of range, and brush management on abundance of northern

- bobwhites (*Colinus Virginianus*) in southern Texas. *Southwestern Naturalist*, 54, 13-18.
64. Cosentino, B. J., Bestelmeyer, B. T., Burkett, L. M., Campos, H., & Schooley, R. L. (2019). Does habitat disturbance promote geographical parthenogenesis in whiptail lizards? *Evolutionary Ecology*, 33(6), 839-853.
65. Dahms, H., Lenoir, L., Lindborg, R., Wolters, V., & Dauber, J. (2010). Restoration of Seminatural Grasslands: What is the Impact on Ants. *Restoration ecology*. 18(3), 330-337.
66. Darr, G.W. & Klebenow, D.A. (1975) Deer, brush control, and livestock on the Texas Rolling Plains. *Journal of Range Management*, 28, 115-119.
67. Darrouzet-Nardi, A., D'antonio, C.M. & Berlow, E.L. (2008) Effects of young *Artemisia rothrockii* shrubs on soil moisture, soil nitrogen cycling, and resident herbs. *Journal of Vegetation Science*, 19, 23-30.
68. Daryanto, S. & Eldridge, D.J. (2010) Plant and soil surface responses to a combination of shrub removal and grazing in a shrub-encroached woodland. *Journal of Environmental Management*, 91, 2639-2648.
69. Daryanto, S., Eldridge, D. & Koen, T. (2012) Soil nutrients under shrub hummocks and debris mounds two decades after ploughing. *Plant & Soil*, 351, 405-419.
70. Daryanto, S., Eldridge, D.J. & Throop, H.L. (2013) Managing semi-arid woodlands for carbon storage: Grazing and shrub effects on above- and belowground carbon. *Agriculture Ecosystems & Environment*, 169, 1-11.
71. Davies, K. W., Bates, J. D., & O'Connor, R. (2021). Long-term evaluation of restoring understories in Wyoming big sagebrush communities with mowing and seeding native bunchgrasses. *Rangeland Ecology & Management*, 75(1), 81-90. doi: 10.1016/j.rama.2020.12.008
72. Davies, K.W. & Bates, J.D. (2014) Attempting to restore herbaceous understories in wyoming big sagebrush communities with mowing and seeding. *Restoration Ecology*, 22, 608-615.
73. Davies, K.W., Bates, J.D. & Miller, R.F. (2007) Short-term effects of burning Wyoming big sagebrush steppe in southeast Oregon. *Rangeland Ecology & Management*, 60, 515-522.



74. Davies, K.W., Bates, J.D. & Nafus, A.M. (2011) Are there benefits to mowing Wyoming big sagebrush plant communities? An evaluation in southeastern Oregon. *Environmental Management*, 48, 539-546.
75. Davies, K.W., Bates, J.D. & Nafus, A.M. (2012) Comparing burned and mowed treatments in mountain big Sagebrush steppe. *Environmental Management*, 50, 451-461.
76. Davis, E.A. (1989) Prescribed fire in Arizona chaparral: effects on stream water quality. *Forest Ecology and Management*, 26, 189-206.
77. Dawson, J.O., Koeser, A., Gottfried, G. & Ffolliott, P. (2016) Nitrogen fertility island stability around *Prosopis glandulosa* sprouts after mechanical shrub control in a degraded grassland. *Communications in Soil Science and Plant Analysis*, 47, 1875-1882.
78. Derner, J.D., Schuman, G.E., Follett, R.F. & Vance, G.F. (2014) Plant and soil consequences of shrub management in a big sagebrush-dominated rangeland ecosystem. *Environment and natural resources research*, 4, 19-30.
79. Dittel, J. W., Sanchez, D., Ellsworth, L. M., Morozumi, C. N., & Mata-Gonzalez, R. (2018). Vegetation Response to Juniper Reduction and Grazing Exclusion in Sagebrush-Steppe Habitat in Eastern Oregon. *Rangeland Ecology & Management*, 71(2), 213-219. doi: 10.1016/j.rama.2017.11.004
80. Dreber, N., Kellner, K., & van Rooyen, S. E. (2019). One savanna, many shapes: How bush control affects the woody layer in the southern Kalahari. *South African Journal of Botany*, 125, 511-520. doi: <http://dx.doi.org/10.1016/j.sajb.2019.08.026>
81. Du Toit, P.F. (1968) A preliminary report on the effect of *Acacia karroo* competition on the composition and yield of sweet grassweed. *Proceedings of the Annual Congresses of the Grassland Society of Southern Africa*, 3, 147-149.
82. Du Toit, P.F. (1972) The goat in a bush-grass community. *Proceedings of the Annual Congresses of the Grassland Society of Southern Africa*, 7, 44-50.
83. Dzwonko, Z. & Loster, S. (2008) Changes in plant species composition in abandoned and restored limestone grasslands - the effects of tree and shrub cutting. *Acta Societatis Botanicorum Poloniae*, 77, 67-75.
84. Edroma, E. L. (1984). Effects of burning and grazing on the productivity and number of plants in Queen Elizabeth National Park, Uganda. *African Journal of Ecology*, 22(3), 165-174. doi: 10.1111/j.1365-2028.1984.tb00691.x

85. Edwards, A. R., Mortimer, S. R., Lawson, C. S., Westbury, D. B., Harris, S. J., Woodcock, B. A., & Brown, V. K. (2007). Hay strewing, brush harvesting of seed and soil disturbance as tools for the enhancement of botanical diversity in grasslands. *Biological Conservation*, 134(3), 372-382.
86. Eldridge, D. J., & Ding, J. J. R. E. (2021). Limited long-term effectiveness of roller-chopping for managing woody encroachment. *Restoration Ecology* 29(1), e13274.
87. Elias, D., Hoelzel, N., & Tischew, S. (2018). Goat paddock grazing improves the conservation status of shrub-encroached dry grasslands. *Tuexenia* (38), 215-233. doi: 10.14471/2018.38.017
88. Elliott, K. J., & Miniati, C. F. (2018). Herbaceous-layer diversity and tree seedling recruitment are enhanced following *Rhododendron maximum* shrub removal. *Forest Ecology and Management*, 430, 403-412. doi: 10.1016/j.foreco.2018.08.016
89. Elliott, K. J., & Miniati, C. F. (2021). Removing riparian *Rhododendron maximum* in post-*Tsuga canadensis* riparian forests does not degrade water quality in southern Appalachian streams. *Science of the Total Environment*, 761. doi: 10.1016/j.scitotenv.2020.143270
90. Engle, D.M., Bodine, T.N. & Stritzke, J.F. (2006) Woody plant community in the cross timbers over two decades of brush treatments. *Rangeland Ecology and Management*, 59, 153-162.
91. Engle, D.M., Mitchell, R.L. & Stevens, R.L. (1998) Late growing-season fire effects in mid-successional tallgrass prairies. *Journal of Range Management*, 115-121.
92. Engle, D.M., Stritzke, J.F. & McCollum, F.T. (1987) Brush management on the cross timbers experimental range: II. Herbaceous plant responses. *Oklahoma Agricultural Experiment Station Miscellaneous Publication*, 103-109.
93. Engle, D.M., Stritzke, J.F., Bidwell, T.G. & Claypool, P.L. (1993) Late-summer fire and follow-up herbicide treatments in tallgrass prairie. *Journal of Range Management*, 46, 542-547.
94. Evans, R.A. & Young, J.A. (1975) Aerial application of 2, 4-D plus picloram for green rabbitbrush control. *Journal of Range Management*, 28, 315-318.
95. Evans, R.A. & Young, J.A. (1977) Weed control-revegetation systems for big sagebrush-downy brome rangelands. *Journal of Range Management*, 30, 331-336.

96. Fiedler, A.K., Landis, D.A. & Arduser, M. (2012) Rapid shift in pollinator communities following invasive species removal. *Restoration Ecology*, 20, 593-602.
97. Fitzgerald, S.M. & Tanner, G.W. (1992) Avian community response to fire and mechanical shrub control in south Florida. *Journal of Range Management*, 45, 396-400.
98. Fogarty, D. T., de Vries, C., Bielski, C., & Twidwell, D. (2021). Rapid Re-encroachment by *Juniperus virginiana* After a Single Restoration Treatment. *Rangeland Ecology & Management*, 78, 112-116. doi: <https://doi.org/10.1016/j.rama.2021.06.002>
99. Forbes, G.S., Van Zee, J.W., Smith, W. & Whitford, W.G. (2005) Desert grassland canopy arthropod species richness: Temporal patterns and effects of intense, short-duration livestock grazing. *Journal of Arid Environments*, 60, 627-646.
100. Frank, G. S., Jenkins, M. A., & Nakatsu, C. H. (2018a). Soil chemistry and microbial community functional responses to invasive shrub removal in mixed hardwood forests. *Applied Soil Ecology*, 131, 75-88. doi: <http://dx.doi.org/10.1016/j.apsoil.2018.08.005>
101. Frank, G. S., Saunders, M. R., & Jenkins, M. A. (2018b). Short-term vegetation responses to invasive shrub control techniques for Amur honeysuckle (*Lonicera maackii* [Rupr.] Herder). *Forests*, 9(10). doi: 10.3390/f9100607
102. Freeman, J.E. & Jose, S. (2009) The role of herbicide in savanna restoration: Effects of shrub reduction treatments on the understory and overstory of a longleaf pine flatwoods. *Forest Ecology and Management*, 257, 978-986.
103. Fritts, S.R., Grisham, B.A., Haukos, D.A., Boal, C.W., Patten, M.A., Wolfe, D.H., Dixon, C.E., Cox, R.D. & Heck, W.R. (2016) Long-term lesser prairie-chicken nest ecology in response to grassland management. *Journal of Wildlife Management*, 80, 527-539.
104. Fulbright, T.E., Alejandro Lozano-Cavazos, E., Ruthven, D.C., III & Lite, A.R. (2013) Plant and small vertebrate composition and diversity 36-39 years after root plowing. *Rangeland Ecology & Management*, 66, 19-25.
105. Gabrielle N. Bohlman, M.N., Hugh D. Safford (2016) Shrub removal in reforested post-fire areas increases native plant species richness. *Forest Ecology and Management*, 195-210.

- 106.** Garcia-Tejero, S., Taboada, A., Tarrega, R. & Salgado, J.M. (2013) Land use changes and ground dwelling beetle conservation in extensive grazing dehesa systems of north-west Spain. *Biological Conservation*, 161, 58-66.
- 107.** Gay, D.L., Allen, E.R., Engle, D.M. & Stritzke, J.F. (1996) Nitrate dynamics following brush control in a post oak-blackjack oak forest. *Agronomy Journal*, 88, 536-540.
- 108.** Germano, D.J. & Hungerford, C.R. (1981) Reptile population changes with manipulation of Sonoran Desert shrub. *Great Basin Naturalist*, 41, 129-138.
- 109.** Gillon, D., Houssard, C., Valette, J.C. & Rigolot, E. (1999) Nitrogen and phosphorus cycling following prescribed burning in natural and managed Aleppo pine forests. *Canadian Journal of Forest Research-Revue Canadienne De Recherche Forestiere*, 29, 1237-1247.
- 110.** Giorgetti, H.D., Montenegro, O.A., Rodriguez, G.D., Busso, C.A., Montani, T., Burgos, M.A., Flemmer, A.C., Toribio, M.B. & Horvitz, S.S. (1997) The comparative influence of past management and rainfall on range herbaceous standing crop in east-central Argentina: 14 years of observations. *Journal of Arid Environments*, 36, 623-637.
- 111.** Greenberg, C.H., Neary, D.G., Harris, L.D. & Linda, S.P. (1995) Vegetation recovery following high-intensity wildfire and silvicultural treatments in sand pine scrub. *American Midland Naturalist*, 149-163.
- 112.** Gruver, B.J. & Guthery, F.S. (1986) Effects of brush control and game-bird management on nongame birds. *Journal of Range Management*, 39, 251-253.
- 113.** Haerdtle, W., Oheimb, G., Niemeyer, M., Niemeyer, T., Assmann, T. & Meyer, H. (2007) Nutrient leaching in dry heathland ecosystems: effects of atmospheric deposition and management. *Biogeochemistry*, 86, 201-215.
- 114.** Haferkamp, M.R., Volesky, J.D., Borman, M.M., Heitschmidt, R.K. & Currie, P.O. (1993) Effects of mechanical treatments and climatic factors on the productivity of northern Great Plains rangelands. *Journal of Range Management*, 46, 346-350.
- 115.** Hale, S. L., Koprowski, J. L., & Archer, S. R. (2020). Black-Tailed Prairie Dog (*Cynomys ludovicianus*) Reintroduction Can Limit Woody Plant Proliferation in Grasslands. *Frontiers in Ecology and Evolution*, 8. doi: 10.3389/fevo.2020.00233

- 116.** Halpern, C.B., Haugo, R.D., Antos, J.A., Kaas, S.S. & Kilanowski, A.L. (2012) Grassland restoration with and without fire: evidence from a tree-removal experiment. *Ecological Applications*, 22, 425-441.
- 117.** Halvorson, J.J., Bolton, H. & Smith, J.L. (1997) The pattern of soil variables related to *Artemisia tridentata* in a burned shrub-steppe site. *Soil Science Society of America Journal*, 61, 287-294.
- 118.** Hanula, J.L. & Horn, S. (2011) Removing an invasive shrub (Chinese privet) increases native bee diversity and abundance in riparian forests of the southeastern United States. *Insect Conservation and Diversity*, 4, 275-283.
- 119.** Hanula, J.L., Horn, S. & Taylor, J.W. (2009) Chinese privet (*Ligustrum sinense*) removal and its effect on native plant communities of riparian forests. *Invasive Plant Science and Management*, 2, 292-300.
- 120.** Harmse, C.J., Kellner, K. & Dreber, N. (2016) Restoring productive rangelands: A comparative assessment of selective and non-selective chemical bush control in a semi-arid Kalahari savanna. *Journal of Arid Environments*, 135, 39-49.
- 121.** Harrington, J.A., Kathol, E. (2009) Responses of shrub midstory and herbaceous layers to managed grazing and fire in a North American Savanna (Oak Woodland) and Prairie Landscape. *Restoration Ecology*, 17, 234-244.
- 122.** Haussmann, N.S., Kalwij, J.M. & Bezuidenhout, S. (2016) Some ecological side-effects of chemical and physical bush clearing in a southern African rangeland ecosystem. *South African Journal of Botany*, 102, 234-239.
- 123.** Havstad, K.M. & James, D. (2010) Prescribed burning to affect a state transition in a shrub-encroached desert grassland. *Journal of Arid Environments*, 74, 1324-1328.
- 124.** Havstad, K.M., Gibbens, R.P., Knorr, C.A. & Murray, L.W. (1999) Long-term influences of shrub removal and lagomorph exclusion on Chihuahuan Desert vegetation dynamics. *Journal of Arid Environments*, 42, 155-166.
- 125.** Haywood, J.D. (1986) Response of planted *Pinus taeda* L. to brush control in northern Louisiana. *Forest Ecology and Management*, 15, 129-134.
- 126.** Haywood, J.D. (2009) Eight years of seasonal burning and herbicidal brush control influence sapling longleaf pine growth, understory vegetation, and the outcome of an ensuing wildfire. *Forest Ecology and Management*, 258, 295-305.

127. Heaton, C.B., Wu, X.B. & Ansley, R.J. (2003) Herbicide effects on vegetation spatial patterns in a mesquite savanna. *Journal of Range Management*, 56, 627-633.
128. Heisler, J.L., Knapp, A.K. & Briggs, J.M. (2007) Fire and resource availability influence carbon and water relations of the C3 shrub *Cornus drummondii* in a mesic grassland. 23rd Tall Timbers Fire Ecology Conference: Fire in Grassland and Shrubland Ecosystems (ed. by R.E. Masters and K.E.M. Galley), pp. 86-93.
129. Henkin, Z., Seligman, N.a.G. & Noy-Meir, I. (2007) Successional Transitions and Management of a Phosphorus-Limited Shrubland Ecosystem. *Rangeland Ecology & Management*, 60, 453-463.
130. Henkin, Z., Seligman, N.G., Noy-Meir, I., Kafkafi, U. & Gutman, M. (1998) Rehabilitation of Mediterranean dwarf-shrub range-land with herbicides, fertilizers, and fire. *Journal of Range Management*, 51, 193-199.
131. Hjeljord, O. & Grønvold, S. (1988) Glyphosate application in forest—ecological aspects VI. Browsing by moose (alces alces) in relation to chemical and mechanical brush control. *Scandinavian Journal of Forest Research*, 3, 115-121.
132. Hopkinson, P., Hammond, M., Bartolome, J. W., & Macaulay, L. (2020). Using consecutive prescribed fires to reduce shrub encroachment in grassland by increasing shrub mortality. *Restoration Ecology*, 28(4), 850-858. doi: 10.1111/rec.13138
133. Hutchinson, J.T. & Langeland, K.A. (2010) Evaluation of aerial herbicide application for reduction of woody vegetation in a floodplain marsh. *Journal of Aquatic Plant Management*, 48, 40-46.
134. Inouye, R.S. (2006) Effects of shrub removal and nitrogen addition on soil moisture in sagebrush steppe. *Journal of Arid Environments*, 65, 604-618.
135. Isaacs, L., Somers, M.J. & Dalerum, F. (2013) Effects of prescribed burning and mechanical bush clearing on ungulate space use in an African savannah. *Restoration Ecology*, 21, 260-266.
136. Johnson, G. & Leopold, D.J. (1998) Habitat management for the eastern massasauga in a central New York peatland. *Journal of Wildlife Management*, 62, 84-97.

137. Johnson, J. C., Williams, C. J., Guertin, D. P., Archer, S. R., Heilman, P., Pierson, F. B., & Wei, H. (2021). Restoration of a shrub-encroached semi-arid grassland: Implications for structural, hydrologic, and sediment connectivity. *Ecohydrology*. doi: 10.1002/eco.2281
138. Jones, B., Fox, S.F., Leslie Jr, D.M., Engle, D.M. & Lochmiller, R.L. (2000) Herpetofaunal responses to brush management with herbicide and fire. *Journal of Range Management*, 53, 154-158.
139. Jose, S., Ranasinghe, S. & Ramsey, C.L. (2010) Longleaf pine (*Pinus palustris* P. Mill.) restoration using herbicides: Overstory and understory vegetation responses on a coastal plain flatwoods site in Florida, U.S.A. *Restoration Ecology*, 18, 244-251.
140. Jurgensen, M.F., Zhou, M., Sharik, T.L. & Richter, D.L. (1997) Ectomycorrhizal colonization of *Quercus rubra* seedlings in response to vegetation removals in oak and pine stands. *Forest Ecology and Management*, 93(1-2), 91-99.
141. Kalmbacher, R.S., Boote, K.J. & Martin, F.G. (1983) Burning and 2, 4, 5-T application on mortality and carbohydrate reserves in Saw-Palmetto. *Journal of Range Management*, 36, 9-12.
142. Kellner, K., Mangani, R. T., Sebitloane, T. J. K., Chirima, J. G., Meyer, N., Coetzee, H. C., . . . Koch, J. (2021). Restoration after bush control in selected range-land areas of semi-arid savannas in South Africa. *Bothalia - African Biodiversity & Conservation*, 51(1), 1-13. doi: 10.38201/btha.abc.v51.i1.7
143. Kembel, S.W., Waters, I. & Shay, J.M. (2008) Short-term effects of cut-to-length versus full-tree harvesting on understory plant communities and understory-regeneration associations in Manitoba boreal forests. *Forest ecology and management*, 255, 1848-1858.
144. Killgore, A., Jackson, E. & Whitford, W.G. (2009) Fire in Chihuahuan Desert grassland: Short-term effects on vegetation, small mammal populations, and faunal pedoturbation. *Journal of Arid Environments*, 73, 1029-1034.
145. Kirby, D.R. & Stuth, J.W. (1982) Brush management influences the nutritive content of cattle diets in east central Texas USA. *Journal of Range Management*, 35, 431-433.
146. Kopp, C. W., & Cleland, E. E. (2018). Plant community response to *Artemisia rothrockii* (sagebrush) encroachment and removal along an arid

elevational gradient. *Journal of Vegetation Science*, 29(5), 859-866. doi:  
10.1111/jvs.12669

- 147.** Kotowski, W., Dzierza, P., Czerwiński, M., Kozub, T. & Śnieg, S. (2013) Shrub removal facilitates recovery of wetland species in a rewetted fen. *Journal for Nature Conservation*, 21, 294-308.
- 148.** Kutiel, P., Peled, Y. & Geffen, E. (2000) The effect of removing shrub cover on annual plants and small mammals in a coastal sand dune ecosystem. *Biological Conservation*, 94, 235-242.
- 149.** Lain, E.J., Haney, A., Burris, J.M. & Burton, J. (2008) Response of vegetation and birds to severe wind disturbance and salvage logging in a southern boreal forest. *Forest Ecology and Management*, 256, 863-871.
- 150.** Lanini, W.T. & Radosevich, S.R. (1986) Response of three conifer species to site preparation and shrub control. *Forest Science*, 32, 61-77.
- 151.** Latt, C.R., Nair, P.K. & Kang, B. (2000) Interactions among cutting frequency, reserve carbohydrates, and post-cutting biomass production in *Gliricidia sepium* and *Leucaena leucocephala*. *Agroforestry Systems*, 50, 27-46.
- 152.** Lee, M.A.B., Ponzio, K.J. & Miller, S.J. (2005) Response of willow (*Salix caroliniana Michx.*) in a floodplain marsh to a growing season prescribed fire. *Natural Areas Journal*, 25, 239-245.
- 153.** Leslie, D.M., Soper, R.B., Lochmiller, R.L. & Engle, D.M. (1996) Habitat use by white-tailed deer on cross timbers rangeland following brush management. *Journal of Range Management*, 49, 401-406.
- 154.** Li, B., Heijmans, M.M.P.D., Blok, D., Wang, P., Karsanaev, S.V., Maximov, T.C., van Huissteden, J. & Berendse, F. (2017) Thaw pond development and initial vegetation succession in experimental plots at a Siberian lowland tundra site. *Plant and Soil*, 1-16.
- 155.** Li, W., Knops, J. M. H., Png, G. K., Yan, X., Dong, H., Li, J., . . . Sierra, R. D. (2020). Six-year removal of co-dominant grasses alleviated competitive pressure on subdominant grasses but dominant shrub removal had neutral effects in a subalpine ecosystem. *Global Ecology and Conservation*, 23. doi:  
10.1016/j.gecco.2020.e01167
- 156.** Lindenmayer, D.B., Wood, J., MacGregor, C., Hobbs, R.J. & Catford, J.A. (2017) Non-target impacts of weed control on birds, mammals, and reptiles. *Ecosphere*, 8(5), e01804.



157. Lindgren, P.M. & Sullivan, T.P. (2001) Influence of alternative vegetation management treatments on conifer plantation attributes: abundance, species diversity, and structural diversity. *Forest Ecology and Management*, 142, 163-182.
158. Lisa, B. & Renato, G. (2006) Recovery of subalpine dwarf shrub heath after neighbour removal and fertilization. *Plant Ecology*, 183, 227-235.
159. Lloyd-Reilley, J., Scifres, C.J. & Blackburn, W.H. (1984) Hydrologic impacts of brush management with Tebuthiuron and prescribed burning on post oak savannah watersheds Texas USA. *Agriculture Ecosystems & Environment*, 11, 213-224.
160. Lochmiller, R.L., Boggs, J.F., McMurry, S.T., Leslie, D.M. & Engle, D.M. (1991) Response of cottontail rabbit populations to herbicide and fire applications on cross timbers rangeland. *Journal of Range Management*, 44, 150-155.
161. Lochmiller, R. L., Pietz, D. G., McMurry, S. T., Leslie Jr, D. M., & Engle, D. M. (1995). Alterations in condition of cottontail rabbits (*Sylvilagus floridanus*) on rangelands following brush management. *Journal of Range Management*, 48(3), 232-239.
162. Long, A.M., Jensen, W.E. & Matlack, R.S. (2014) Influence of prescribed burning on bird abundance and species assemblage in a semiarid Great Plains grassland. *Western North American Naturalist*, 74, 396-404.
163. Lopes, E.A. & Stuth, J.W. (1984) Dietary selection and nutrition of Spanish goats as influenced by brush management. *Journal of Range Management*, 37, 554-560.
164. Love, J., Anderson, J. (2009) Seasonal effects of four control methods on the invasive morrow's honeysuckle (*Lonicera morrowii*) and initial responses of understory plants in a southwestern Pennsylvania old field. *Restoration ecology*, 17, 549-559.
165. Luken, J.O. & Mattimiro, D.T. (1991) Habitat-specific resilience of the invasive shrub amur honeysuckle *Lonicera-Maackii* during repeated clipping. *Ecological Applications*, 1, 104-109.
166. Maccherini, S., Marignani, M., Castagnini, P. & Van den Brink, P.J. (2007) Multivariate analysis of the response of overgrown semi-natural Calcareous grasslands to restorative shrub cutting. *Basic and Applied Ecology*, 8(4), 332-342.

167. Macdonald, S.E. & Fenniak, T.E. (2007) Understory plant communities of boreal mixedwood forests in western Canada: natural patterns and response to variable-retention harvesting. *Forest Ecology and Management*, 242, 34-48.
168. Maron, J.L. & Jefferies, R.L. (2001) Restoring enriched grasslands: effects of mowing on species richness, productivity, and nitrogen retention. *Ecological Applications*, 11, 1088-1100.
169. Marozas, V., Racinkas, J. & Bartkevicius, E. (2007) Dynamics of ground vegetation after surface fires in hemiboreal *Pinus sylvestris* forests. *Forest Ecology and Management*, 250, 47-55.
170. Masson, S., Mesléard, F. & Dutoit, T. (2015) Using shrub clearing, draining, and herbivory to control bramble invasion in Mediterranean dry grasslands. *Environmental management*, 56, 933-945.
171. Mata-González, R., Figueroa-Sandoval, B., Clemente, F. & Manzano, M. (2007) Vegetation changes after livestock grazing exclusion and shrub control in the southern Chihuahuan Desert. *Western North American Naturalist*, 67, 63-70.
172. Mathis, V.L., Whitford, W.G., Kay, F.R. & Alkon, P.U. (2006) Effects of grazing and shrub removal on small mammal populations in southern New Mexico, USA. *Journal of Arid Environments*, 66, 76-86.
173. McDaniel, K.C., Brock, J.H. & Haas, R.H. (1982) Changes in Vegetation and grazing capacity following honey mesquite *Prosopis-glandulosa-var-glandulosa* control. *Journal of Range Management*, 35, 551-557.
174. McGlone, C.M. (2013) No long-term effects of prescribed fire on Lehmann lovegrass (*Eragrostis lehmanniana*)-Invaded desert grassland. *Invasive Plant Science and Management*, 6, 449-456.
175. McPherson, G.R. & Weltzin, J.F. (1998) Herbaceous response to canopy removal in southwestern oak woodlands. *Journal of Range Management*, 674-678.
176. Metlen, K.L. & Fiedler, C.E. (2006) Restoration treatment effects on the understory of ponderosa pine/Douglas-fir forests in western Montana, USA. *Forest Ecology and Management*, 222, 355-369.
177. Middleton, B. (2002) Winter burning and the reduction of *Cornus sericea* in sedge meadows in southern Wisconsin. *Restoration Ecology*, 10, 723-730.
178. Mndela, M., Dube, S., Madakadze, I. C., & Nherera-Chokuda, F. (2019). Dynamics of the soil seed bank over the short-term after bush clearing in a semi-

- arid shrubland in Springbokvlakte thornveld of South Africa. *South African Journal of Botany*, 125, 298-309. doi: <http://dx.doi.org/10.1016/j.sajb.2019.07.033>
- 179.** Mandela, M., Madakadze, C. I., Nherera-Chokuda, F., & Dube, S. (2020). Is the soil seed bank a reliable source for passive restoration of bush-cleared semi-arid rangelands of South Africa? *Ecological Processes*, 9(1). doi: 10.1186/s13717-019-0204-6
- 180.** Moore, G.W., Barre, D.A. & Owens, M. (2012) Does shrub removal increase groundwater recharge in southwestern Texas semiarid rangelands? *Rangeland Ecology & Management*, 65, 1-10.
- 181.** Moore, G.W., Barre, D.A. & Owens, M.K. (2010) Changes in soil chloride following shrub removal and subsequent regrowth. *Geoderma*, 158, 148-155.
- 182.** Morton, H.L. & Melgoza, A. (1991) Vegetation changes following brush control in creosotebush communities. *Journal of Range Management*, 44, 133-139.
- 183.** Morton, H.L., Ibarra-F, F.A., Martin-R, M.H. & Cox, J.R. (1990) Creosotebush control and forage production in the Chihuahuan and Sonoran Deserts. *Journal of Range Management*, 43-48.
- 184.** Msafiri, D.N. & Pieper, R.D. (1989) Vegetational response to herbicide treatment for brush control in Tanzania. *Journal of Range Management*, 42, 332-336.
- 185.** Murray, R.B. (1988) Response of Three Shrub Communities in Southern Idaho USA to Spring-Applied Tebuthiuron. *Journal of Range Management*, 41, 16-22.
- 186.** Nash, M.S., Jackson, E. & Whitford, W.G. (2004) Effects of intense, short-duration grazing on microtopography in a Chihuahuan Desert grassland. *Journal of Arid Environments*, 56, 383-393.
- 187.** Nauta, A.L., Heijmans, M.M.P.D., Blok, D., Limpens, J., Elberling, B., Gallagher, A., Li, B., Petrov, R.E., Maximov, T.C., van Huissteden, J. & Berendse, F. (2015) Permafrost collapse after shrub removal shifts tundra ecosystem to a methane source. *Nature Climate Change*, 5, 67-70.
- 188.** Negasa, B., Eba, B., Tuffa, S., Bayissa, B., Doyo, J. & Husen, N. (2014) Control of bush encroachment in Borana zone of southern Ethiopia: effects of different control techniques on rangeland vegetation and tick populations. *Pastoralism*, 4, 18.

- 189.** Newman, E. A., Potts, J. B., Tingley, M. W., Vaughn, C., & Stephens, S. L. (2018). Chaparral bird community responses to prescribed fire and shrub removal in three management seasons. *Journal of Applied Ecology*, *55*(4), 1615-1625. doi: 10.1111/1365-2664.13099
- 190.** Nolte, D.L. & Fick, W.H. (1992) Tebuthiuron application for brush control in the northern Flint Hills, Kansas. *Transactions of the Kansas Academy of Science*, *95*, 100-108.
- 191.** Nolte, K.R. & Fulbright, T.E. (1997) Plant, small mammal, and avian diversity following control of honey mesquite. *Journal of Range Management*, 205-212.
- 192.** Nolte, K.R., Gabor, T.M., Hehman, M.W., Asleson, M.A., Fulbright, T.E. & Rutledge, J.C. (1994) Long-term effects of brush management on vegetation diversity in ephemeral drainages. *Journal of Range Management*, *47*, 457-459.
- 193.** Ockinger, E., Eriksson, A.K. & Smith, H.G. (2006) Effects of grassland abandonment, restoration and management on butterflies and vascular plants. *Biological Conservation*, *133*, 291-300.
- 194.** Olson, M. G., & Keeley, M. T. (2018). Controlling dense layers of pawpaw (*Asimina triloba*) in mesic upland forest understories. *Forest Science*, *64*(3), 324-329. doi: 10.1093/forsci/fxx015
- 195.** Olson, R.A. & Whitson, T.D. (2002) Restoring structure in late-successional sagebrush communities by thinning with tebuthiuron. *Restoration Ecology*, *10*, 146-155.
- 196.** Osburn, E. D., Miniati, C. F., Elliott, K. J., & Barrett, J. E. (2021). Effects of *Rhododendron* removal on soil bacterial and fungal communities in southern Appalachian forests. *Forest Ecology and Management*, *496*, 119398.
- 197.** Owings, C.F., Jacobs, D.F., Shields, J.M., Saunders, M.R. & Jenkins, M.A. (2017) Individual and interactive effects of white-tailed deer and an exotic shrub on artificial and natural regeneration in mixed hardwood forests. *AoB Plants*, *9*, 1-14.
- 198.** Page, M., Beeton, R.J.S. & Mott, J.J. (2000) Grass response to shrub removal in two semi-arid vegetation communities. *Rangeland Journal*, *22*, 220-234.
- 199.** Papachristou, T.G., Platis, P.D. & Papanastasis, V.P. (1996) Forage production and small ruminant grazing responses in Mediterranean shrublands as

- influenced by the reduction of shrub cover. *Agroforestry Systems*, 35 (3) pp. 225-238, 1996/1997,
200. Parker, W.C., Pitt, D.G. & Morneault, A.E. (2010) Influence of woody and herbaceous vegetation control on leaf gas exchange, water status, and nutrient relations of eastern white pine (*Pinus strobus L.*) seedlings planted in a central Ontario clearcut. *Forest ecology and management.*, 260, 2012-2022.
  201. Parmenter, R.R. & Macmahon, J.A. (1983) Factors determining the abundance and distribution of rodents in a shrub steppe ecosystem the role of shrubs. *Oecologia*, 59, 145-156.
  202. Passera, C.B., Borsetto, O. & Allegretti, L.I. (1996) Short-term effects to shrub control on two different plant communities in Argentina. *Journal of Arid Environments*, 34, 415-420.
  203. Perevolotsky, A. & Haimov, Y. (1992) The effect of thinning and goat browsing on the structure and development of Mediterranean woodland in Israel. *Forest Ecology and Management*, 49, 61-74.
  204. Perevolotsky, A., Ne'eman, G., Yonatan, R. & Henkin, Z. (2001) Resilience of prickly burnet to management in east Mediterranean rangelands. *Journal of Range Management*, 54, 561-566.
  205. Pérez-Devesa, M., Cortina, J., Vilagrosa, A. & Vallejo, R. (2008) Shrubland management to promote *Quercus suber L.* establishment. *Forest Ecology and Management*, 255, 374-382.
  206. Perez-Ramos, I.M., Zavala, M.A., Maranon, T., Diaz-Villa, M.D. & Valladares, F. (2008) Dynamics of understory herbaceous plant diversity following shrub clearing of cork oak forests: A five-year study. *Forest Ecology and Management*, 255, 3242-3253.
  207. Perkins, S.R. & McDaniel, K.C. (2005) Infiltration and sediment rates following creosotebush control with tebuthiuron. *Rangeland Ecology and Management*, 58, 605-613.
  208. Petersen, S.M. & Drewa, P.B. (2014) Effects of biennial fire and clipping on woody and herbaceous ground layer vegetation: Implications for restoration and management of oak barren ecosystems. *Restoration Ecology*, 22, 525-533.
  209. Pinchak, W.E., Teague, W.R., Ansley, R.J., Waggoner, J.A. & Dowhower, S.L. (2010) Integrated grazing and prescribed fire restoration strategies in a

mesquite Savanna: III. Ranch-scale cow-calf production responses. *Rangeland Ecology and Management*, 63, 298-307.

210. Pittarello, M., Probo, M., Lonati, M. & Lombardi, G. (2016) Restoration of sub-alpine shrub-encroached grasslands through pastoral practices: effects on vegetation structure and botanical composition. *Applied Vegetation Science*, 19, 381-390.
211. Poniatoski, D., Stuhldreher, G., Helbing, F., Hamer, U., & Fartmann, T. (2020). Restoration of calcareous grasslands: The early successional stage promotes biodiversity. *Ecological Engineering*, 151.
212. Ponzio, K.J., Miller, S.J., Underwood, E., Rowe, S.P., Voltolina, D.J. & Miller, T.D. (2006) Responses of a willow (*Salix caroliniana Michx.*) community to roller-chopping. *Natural Areas Journal*, 26, 53-60.
213. Powell, J. & Box, T.W. (1961) Mechanical control and fertilization as brush management practices affect forage production in south Texas. *Journal of Range Management*, 20, 227-236.
214. Puettmann, K.J. & Saunders, M.R. (1999) Effects of observatory and understory competition and simulated herbivory on growth and survival of white pine seedlings. *Canadian Journal of Forest Research*, 29(5), 536-546.
215. Quinton, D.A., Horejsi, R.G. & Flinders, J.T. (1979) Influence of Brush Control on White-Tailed Deer Diets in North Central Texas USA. *Journal of Range Management*, 32, 93-97.
216. Rathfon, R. A., Greenler, S. M., & Jenkins, M. A. (2021). Effects of prescribed grazing by goats on non-native invasive shrubs and native plant species in a mixed-hardwood forest. *Restoration Ecology*. doi: 10.1111/rec.13361
217. Ravn, N. R., Elberling, B., & Michelsen, A. (2020). Arctic soil carbon turnover controlled by experimental snow addition, summer warming and shrub removal. *Soil Biology & Biochemistry*, 142. doi: 10.1016/j.soilbio.2019.107698
218. Redmond, M.D., Cobb, N.S., Miller, M.E. & Barger, N.N. (2013) Long-term effects of chaining treatments on vegetation structure in piñon-juniper woodlands of the Colorado Plateau. *Forest Ecology and Management*, 305, 120-128.
219. Rejžek, M., Svátek, M., Kvasnica, J., Matula, R., Coria, R.D., Kunst, C., Navall, M., Ledesma, R. & Gómez, A. (2017) To chop or not to chop? Tackling shrub encroachment by roller-chopping preserves woody plant diversity and

- composition in a dry subtropical forest. *Forest Ecology and Management*, 402, 29-36.
- 220.** Reynolds, L.V. & Cooper, D.J. (2011) Ecosystem response to removal of exotic riparian shrubs and a transition to upland vegetation. *Plant Ecology*, 212, 1243-1261.
- 221.** Richardson, C.W., Burnett, E. & Bovey, R.W. (1979) Hydrological effects of brush control on Texas rangelands. *Transactions American Society of Agricultural Engineers*, 22, 315-319.
- 222.** Rietkerk, M., Blijdorp, R. & Slingerland, M. (1998) Cutting and resprouting of *Dentarium microcarpum* and herbaceous forage availability in semiarid environment in Burkina Faso. *Agroforestry Systems*, 41(2), 201-211.
- 223.** Robson, A. (1995) The effects of grazing exclusion and blade-ploughing on semi-arid woodland vegetation in north-western New South Wales over 30 months. *Rangeland Journal*, 17, 111-127.
- 224.** Rollins, D. & Bryant, F.C. (1986) Floral changes following mechanical brush removal in central Texas. *Journal of Range Management*, 39, 237-240.
- 225.** Rollins, D., Bryant, F.C., Waid, D.D. & Bradley, L.C. (1988) Deer response to brush management in central Texas. *Wildlife Society Bulletin*, 16, 277-284.
- 226.** Rose, R., Rosner, L.S. & Ketchum, J.S. (2006) Twelfth-year response of Douglas-fir to area of weed control and herbaceous versus woody weed control treatments. *Canadian Journal of Forest Research*, 36(10), 2464-2473.
- 227.** Roukos, C., Papanikolaou, K., Nikolaou, E., Chatzitheodoridis, F. & Mountousis, I. (2008) Effects of fertilization and clipping of *Phlomis fruticosa* L. on a phryganic ecosystem: The case of thesprotia, Northwest Greece. *American Journal of Environmental Sciences*, 4, 551-557.
- 228.** Roundy, B.A., Miller, R.F., Tausch, R.J., Young, K., Hulet, A., Rau, B., Jessop, B., Chambers, J.C. & Eggett, D. (2014) Understory cover responses to Piñon-Juniper treatments across tree dominance gradients in the Great Basin. *Rangeland Ecology and Management*, 67, 482-494.
- 229.** Ruthven, D.C. & Krakauer, K.L. (2004) Vegetation response of a mesquite-mixed brush community to aeration. *Journal of range management*, 57, 34-40.
- 230.** Ruthven, D.C., Fulbright, T.E., Beasom, S.L. & Hellgren, E.C. (1993) Long-term effects of root plowing on vegetation in the eastern south Texas plains. *Journal of Range Management*, 46, 351-354.

231. Ruthven, D.C.I., Hellgren, E.C. & Beasom, S.L. (1994) Effects of root plowing on white-tailed deer condition, population status, and diet. *Journal of Wildlife Management*, 58, 59-70.
232. Saleh, A., Wu, H., Brown, C.S., Teagarden, F.M., McWilliams, S.M., Hauck, L.M. & Millican, J.S. (2009) Effect of brush control on evapotranspiration in the North Concho River watershed using the eddy covariance technique. *Journal of Soil and Water Conservation*, 64, 336-349.
233. Sanchez-Velasquez, L.R., Dominguez-Hernandez, D., Pineda-Lopez, M.d.R. & Lara-Gonzalez, R. (2011) Does *Baccharis conferta* shrub act as a nurse plant to the *Abies religiosa* seedling? *Open Forest Science Journal*, 4, 67-70.
234. Santos-Silva, C. & Louro, R. (2016) Assessment of the diversity of epigeous Basidiomycota under different soil-management systems in a montado ecosystem: a case study conducted in Alentejo. *Agroforestry systems*, 90, 117-126.
235. Saunders, M.R. & Puettmann, K.J. (1999) Effects of overstory and understory competition and simulated herbivory on growth and survival of white pine seedlings. *Canadian Journal of Forest Research*, 29, 536-546.
236. Sbatella, G.M., Wilson, R.G. & Sleugh, B. (2011) Western snowberry (*Symphoricarpos occidentalis*) control with aminopyralid and metsulfuron. *Weed Technology*, 25, 616-619.
237. Schindler, J.R., Fulbright, T.E. & Forbes, T.D.A. (2004) Shrub regrowth, antiherbivore defenses, and nutritional value following fire. *Journal of Range Management*, 57, 178-186.
238. Schmutz, E.M., Cable, D.R. & Warwick, J.J. (1959) Effect of shrub removal on the vegetation of a semidesert grass-shrub range. *Jour Range Management*, 12, 34-37.
239. Schrautzer, J., Jansen, D., Breuer, M. & Nelle, O. (2009) Succession and management of calcareous dry grasslands in the Northern Franconian Jura, Germany. *Tuexenia*, 339-351.
240. Scifres, C.J. (1987) Economic assessment of tebuthiuron-fire systems for brush management. *Weed Technology*, 1, 22-28.
241. Scifres, C.J., Durham, G.P. & Mutz, J.L. (1977) Range Forage Production and Consumption Following Aerial Spraying of Mixed Brush. *Weed Science*, 25, 48-54.



- 242.** Scifres, C.J., Mutz, J.L. & Durham, G.P. (1976) Range management following changing of South Texas mixed brush. *Journal of Range Management*, 29, 418-421.
- 243.** Scifres, C.J., Stuth, J.W., Kirby, D.R. & Angell, R.F. (1981) Forage and livestock production following oak (*Quercus* spp.) control with tebuthiuron. *Weed Science*, 29, 535-539.
- 244.** Seavy, N.E., Alexander, J.D. & Hosten, P.E. (2008) Bird community composition after mechanical mastication fuel treatments in southwest Oregon oak woodland and chaparral. *Forest Ecology and Management*, 256, 774-778.
- 245.** Seefeldt, S.S., Germino, M. & DiCristina, K. (2007) Prescribed fires in *Artemisia tridentata* ssp *vaseyana* steppe have minor and transient effects on vegetation cover and composition. *Applied Vegetation Science*, 10, 249-256.
- 246.** Seefeldt, S. S., Kaspari, P. N., & Conn, J. S. (2013). Shrub control in conservation reserve program lands in interior Alaska. *Weed Technology*, 27(1), 184-189. doi: 10.1614/WT-D-12-00052.1
- 247.** Severson, J. P., Hagen, C. A., Tack, J. D., Maestas, J. D., Naugle, D. E., Forbes, J. T., & Reese, K. P. (2017). Better living through conifer removal: A demographic analysis of sage-grouse vital rates. *PloS one*, 12(3). doi: 10.1371/journal.pone.0174347
- 248.** Seyfried, M.S. & Wilcox, B.P. (2006) Soil water storage and rooting depth: Key factors controlling recharge on rangelands. *Hydrological Processes*, 20, 3261-3275.
- 249.** Sharrow, S.H., Leininger, W.C. & Rhodes, B. (1989) Sheep Grazing as a Silvicultural Tool to Suppress Brush. *Journal of Range Management*, 42, 2-4.
- 250.** Sheley, R.L. & James, J. (2010) Resistance of native plant functional groups to invasion by medusahead (*Taeniatherum caput-medusae*). *Invasive Plant Science and Management*, 3, 294-300.
- 251.** Sheley, R.L., Mangold, J.M. & Anderson, J.L. (2006) Potential for successional theory to guide restoration of invasive-plant-dominated rangeland. *Ecological Monographs*, 76, 365-379.
- 252.** Shields, J.M., Saunders, M.R., Gibson, K.D., Zollner, P.A., Dunning Jr, J.B. & Jenkins, M.A. (2015) Short-term response of native flora to the removal of non-native shrubs in mixed-hardwood forests of Indiana, USA. *Forests*, 6, 1878-1896.

- 253.** Slosser, J.E., Jacoby, P.W. & Price, J.R. (1985) Management of sand shinnery oak for control of the boll weevil (*Coleoptera, Curculionidae*) in the Texas rolling plains. *Journal of Economic Entomology*, 78, 383-389.
- 254.** Smit, I.P.J., Asner, G.P., Govender, N., Vaughn, N.R. & Wilgen, B.W. (2016) An examination of the potential efficacy of high-intensity fires for reversing woody encroachment in savannas. *Journal of Applied Ecology*, 53, 1623-1633.
- 255.** Smythe, L.A. & Haukos, D.A. (2009) Nesting success of grassland birds in shinnery oak communities treated with Tebuthiuron and grazing in eastern New Mexico. *Southwestern Naturalist*, 54, 136-145.
- 256.** Soto, B. & Diaz-Fierros, F. (1997) Soil water balance as affected by throughfall in gorse (*Ulex europaeus L.*) shrubland after burning. *Journal of Hydrology* (Amsterdam), 195, 218.
- 257.** Stanford, R.L., Ansley, R.J. & Ransom Jr, D. (2008) Common broom weed growth characteristics in cleared and woody landscapes. *Rangeland Ecology and Management*, 61, 561-565.
- 258.** Stevens, J.T. & Beckage, B. (2010) Fire effects on demography of the invasive shrub Brazilian Pepper (*Schinus terebinthifolius*) in Florida pine savannas. *Natural Areas Journal*, 30, 53-63.
- 259.** Stewart, K.M., Bonner, J.P., Palmer, G.R., Patten, S.F. & Fulbright, T.E. (1997) Shrub species richness beneath honey mesquite on root-plowed rangeland. *Journal of Range Management*, 50, 213-216.
- 260.** Stritzke, J.F., Engle, D.M. & McCollum, F.T. (1991) Vegetation management in the cross timbers response of woody species to herbicides and burning. *Weed Technology*, 5, 400-405.
- 261.** Suffling, R. & Smith, D.W. (1979) The effect of Tordon 101 herbicide on soil organic matter balance. *Canadian Journal of Botany*, 57, 108-116.
- 262.** Sullivan, T.P. (1994) Influence of herbicide-induced habitat alteration on vegetation and snowshoe hare populations in sub-boreal spruce forest. *Journal of Applied Ecology*, 31, 717-730.
- 263.** Sullivan, T.P., Wagner, R.G., Pitt, D.G., Lautenschlager, R.A. & Chen, D.G. (1998) Changes in diversity of plant and small mammal communities after herbicide application in sub-boreal spruce forest. *Canadian Journal of Forest Research*, 28 (2), 168-177.

- 264.** Sweet, R.J. (1982) Bush control with fire in acacia nigrescens. Proceedings of the Annual Congresses of the Grassland Society of Southern Africa, 17, 25-28.
- 265.** Szmátóna-Túri, T., Vóna-Túri, D., Magos, G., & Urbán, L. (2017). The effect of grassland management on diversity and composition of ground-dwelling spider assemblages in the Mátra Landscape Protection Area of Hungary. *Biologia (Poland)*, 72(6), 642-651. doi: 10.1515/biolog-2017-0075
- 266.** Szmátóna-Túri, T., Vóna-Túri, D., Urbán, L., Weiperth, A., & Magos, G. (2019). How grassland management methods affect spider diversity. *Acta Universitatis Sapientiae. Agriculture and environment*, 11(1), 23-37. doi: <http://dx.doi.org/10.2478/ausae-2019-0003>
- 267.** Taft, J. B., Carroll-Cunningham, C., Kron, Z. P., & Grant, H. L. (2019). Can a mesic grassland mosaic recover from thicketization? Insights from seven years monitoring species abundance. *Ecological Restoration*, 37(1), 8-24. doi: 10.3368/er.37.1.8
- 268.** Tarrega, R., Calvo, L., Taboada, A., Garcia-Tejero, S. & Marcos, E. (2009) Abandonment and management in Spanish dehesa systems: Effects on soil features and plant species richness and composition. *Forest Ecology and Management*, 257, 731-738.
- 269.** Teague, W.R., Duke, S.E., Waggoner, J.A., Dowhower, S.L. & Gerrard, S.A. (2008) Rangeland vegetation and soil response to summer patch fires under continuous grazing. *Arid Land Research and Management*, 22, 228-241.
- 270.** Thacker, E.T., Gillen, R.L., Gunter, S.A. & Springer, T.L. (2012) Chemical control of sand sagebrush: Implications for lesser prairie-chicken habitat. *Rangeland Ecology and Management*, 65, 516-522.
- 271.** Thiffault, N., Titus, B.D. & Munson, A.D. (2004) Black spruce seedlings in a Kalmia–Vaccinium association: microsite manipulation to explore interactions in the field. *Canadian Journal of Forest Research*, 34, 1657-1668.
- 272.** Thomas, J., Hofmeyer, D. & Benwell, A.S. (2006) Bitou bush control (after fire) in Bundjalung National Park on the New South Wales north coast. *Ecological Management and Restoration*, 7, 79-92.
- 273.** Thompson, D.K., Benscoter, B.W. & Waddington, J.M. (2014) Water balance of a burned and unburned forested boreal peatland. *Hydrological Processes*, 28, 5954-5964.

- 274.** Thompson, S.J., Arnold, T.W., Fieberg, J., Granfors, D.A., Vacek, S. & Palala, N. (2016) Grassland birds demonstrate delayed response to large-scale tree removal in central North America. *Journal of Applied Ecology*, 53, 284-294.
- 275.** Tocco, C., Probo, M., Lonati, M., Lombardi, G., Negro, M., Nervo, B., Rolando, A. & Palestrini, C. (2013) Pastoral practices to reverse shrub encroachment of sub-alpine grasslands: dung beetles (*Coleoptera, Scarabaeoidea*) respond more quickly than vegetation. *PLoS ONE*, 8.
- 276.** Tupper, G. & Muller, W. (1985) Preliminary observations on the effect of removal of black bluebush (*Maireana pyramidata*) and Pearl Bluebush (*M. sedifolia*) on shrub regeneration, herbage production and erosion potential. *Rangeland Journal*, 7, 103-106.
- 277.** Ulyshen, M.D., Horn, S. & Hanula, J.L. (2010) Response of beetles (*Coleoptera*) at three heights to the experimental removal of an invasive shrub, Chinese privet (*Ligustrum sinense*), from floodplain forests. *Biological Invasions*, 12, 1573-1579.
- 278.** Urcelay, C., Díaz, S., Gurvich, D.E., Chapin Iii, F.S., Cuevas, E. & Domínguez, L.S. (2009) Mycorrhizal community resilience in response to experimental plant functional type removals in a woody ecosystem. *Journal of Ecology*, 97, 1291-1301.
- 279.** Uresk, D.W. & Boldt, C.E. (1986) Effect of cultural treatments on regeneration of native woodlands on the northern Great Plains. *Prairie Naturalist*, 18, 193-202.
- 280.** Valderrábano, J. & Torrano, L. (2000) The potential for using goats to control *Genista scorpius* shrubs in European black pine stands. *Forest Ecology and Management*, 126, 377-383.
- 281.** Voysey, M. D., Archibald, S., Bond, W. J., Donaldson, J. E., Carla Staver, A., & Greve, M. (2021). The role of browsers in maintaining the openness of savanna grazing lawns. *Journal of Ecology*, 109(2), 913-926.
- 282.** Walker, L.R., Thompson, D.B. & Landau, F.H. (2001) Experimental manipulations of fertile islands and nurse plant effects in the Mojave Desert, USA. *Western North American Naturalist*, 61, 25-35.
- 283.** Warren, S.D., St.Clair, L.L., Johansen, J.R., Kugrens, P., Baggett, L.S. & Bird, B.J. (2015) Biological soil crust response to late season prescribed fire in a

- Great Basin Juniper woodland. *Rangeland Ecology and Management*, 68, 241-247.
284. Wayman, R.B. & North, M. (2007) Initial response of a mixed-conifer understory plant community to burning and thinning restoration treatments. *Forest Ecology and Management*, 239, 32-44.
285. Weltzin, J.F., Archer, S. & Heitschmidt, R.K. (1997) Small-mammal regulation of vegetation structure in a temperate savanna. *Ecology*, 78, 751-763.
286. Wetzell, S. & Burgess, D. (2001) Understorey environment and vegetation response after partial cutting and site preparation in *Pinus strobus* L. stands. *Forest Ecology and Management*, 151(1-3), 43-59.
287. Wezel, A. (2000) Scattered shrubs in pearl millet fields in semiarid Niger: Effect on millet production. *Agroforestry Systems*, 48, 219-228.
288. White, C. S., Loftin, S. R., & Hofstad, S. (1999). Response of vegetation, soil nitrogen, and sediment transport to a prescribed fire in semiarid grasslands. In: Finch, Deborah M.; Whitney, Jeffrey C.; Kelly, Jeffrey, F.; Loftin, Samuel R. *Rio Grande ecosystems: linking land, water, and people: Toward a sustainable future for the Middle Rio Grande Basin*. 1998 June 2-5; Albuquerque, NM. Proc. RMRS-P-7. Ogden, UT: US Department of Agriculture, Forest Service, Rocky Mountain Research Station. pp. 83-92.
289. White, C.S., Pendleton, R.L. & Pendleton, B.K. (2006) Response of two semiarid grasslands to a second fire application. *Rangeland Ecology & Management*, 59, 98-106.
290. Whitford, W.G., Zee, J.V., Havstad, K.M. & Nash, M.S. (2000) Ant (*Hymenoptera: Formicidae*) responses to environmental stressors in the northern Chihuahuan Desert. *Environmental Entomology*, 29, 200.
291. Wiedemann, A.T. & Cross, B.T. (2001) Chain dicker effects on seeded grass establishment following disk chaining. *Journal of Range Management*, 54, 138-143.
292. Wilbert, D.E. (1963) Some effects of chemical sagebrush control on elk distribution. *Journal of Range Management*, 16, 74-78.
293. Wilkie, L., Cassis, G. & Gray, M. (2007) The effects on terrestrial arthropod communities of invasion of a coastal heath ecosystem by the exotic weed bitou bush (*Chrysanthemoides monilifera* ssp. *rotundata* L.). *Biological Invasions*, 9, 477-498.

- 294.** Wilkinson, G.R., Neilsen, W.A. & Edwards, L.G. (1992) Hexazinone use for grass and woody weed control - effects on establishment and long-term growth of *Pinus radiata* plantations. *New Zealand Journal of Forestry Science*, 22, 12-23.
- 295.** Willcox, E.V. & Giuliano, W.M. (2010) Seasonal effects of prescribed burning and roller chopping on saw palmetto in flatwoods. *Forest Ecology and Management*, 259, 1580-1585.
- 296.** Willcox, E.V. & Giuliano, W.M. (2012) Roller Chopping Effectively Reduces Shrub Cover and Density in Pine Flatwoods. *Restoration Ecology*, 20, 721-729.
- 297.** Willoughby, I., Dixon, F.L., Clay, D.V. & Jinks, R.L. (2007) Tolerance of broadleaved tree and shrub seedlings to preemergence herbicides. *New forests.*, 34, 1-12.
- 298.** Wolk, B. & Rocca, M.E. (2009) Thinning and chipping small-diameter ponderosa pine changes understory plant communities on the Colorado Front Range. *Forest Ecology and Management*, 257, 85-95.
- 299.** Wonkka, C. L., West, J. B., Twidwell, D., & Rogers, W. E. (2017). Grass Mortality and Turnover Following Core Rangeland Restoration Practices. *Rangeland Ecology and Management*, 70(3), 290-300. doi: 10.1016/j.rama.2016.10.011
- 300.** Wonkka, C.L., Twidwell, D., West, J.B. & Rogers, W.E. (2016) Shrubland resilience varies across soil types: Implications for operationalizing resilience in ecological restoration. *Ecological Applications*, 26, 128-145.
- 301.** Wouters, B., Nijssen, M., Geerling, G., Van Kleef, H., Remke, E. & Verberk, W. (2012) The effects of shifting vegetation mosaics on habitat suitability for coastal dune fauna-a case study on sand lizards (*Lacerta agilis*). *Journal of Coastal Conservation*, 16, 89-99.
- 302.** Wu, W., Hu, Y., Li, Y., Gong, J., Chen, L., Chang, Y. & Xiong, Z. (2016) Plant diversity and vegetation structures in the understory of mixed boreal forests under different management regimes. *Polish Journal of Environmental Studies*, 25, 1749-1757.
- 303.** Yildiz, O., Cromack, K., Jr., Radosevich, S.R., Martinez-Ghersa, M.A. & Baham, J.E. (2011) Comparison of 5th-and 14th-year Douglas-fir and understory vegetation responses to selective vegetation removal. *Forest Ecology and Management*, 262, 586-597.

- 304.** Yin, B. F., Zhang, Y. M., & Lou, A. R. (2017). Impacts of the removal of shrubs on the physiological and biochemical characteristics of *Syntrichia caninervis* Mitt: In a temperate desert. *Scientific Reports*, 7. doi: 10.1038/srep45268
- 305.** Zenner, E.K. & Peck, J.E. (2009) Maintaining a pine legacy in Itasca state park. *Natural Areas Journal*, 29, 157-166.
- 306.** Zhang, J., Oliver, W.W. & Busse, M.D. (2006) Growth and development of ponderosa pine on sites of contrasting productivities: Relative importance of stand density and shrub competition effects. *Canadian journal of forest research*, 36(10), 2426-2438.
- 307.** Zhang, J., Young, D.H. & Luckow, K.R. (2015) Effect of redistributing windrowed topsoil on growth and development of ponderosa pine plantations. *Forest Ecology and Management*, 353, 148-155.
- 308.** Zhou, M., Sharik, T.L., Jurgensen, M.F. & Richter, D.L. (1997) Ectomycorrhizal colonization of *Quercus rubra* seedlings in response to vegetation removal in oak and pine stands. *Forest Ecology and Management*, 93, 91-99.

### **Appendix S3. Converting categorical woody plant traits to numeric value**

We converted the categorical traits into numeric values by ranking each categorical trait such that a larger number represented greater function in terms of its own growth or for facilitating surrounding conditions. For plant shape, we ranked different shapes according to a greater ability to obtain resources for the understorey (water and light) with v-shaped plants accumulate resources for itself while pyramid plants accumulate more rainfall for understorey (De Soyza et al., 1997). For ground contact (i.e. whether foliage contact ground), high values were ranked according to the ability to provide habitat for understorey species with ground contact plant can better protect understorey habitat (Wang et al., 2013; Okin et al., 2006). For deciduousness, we ranked the higher value for the ability of such species to benefit their growth conditions (e.g., greater litter inputs to the soil nutrient pool) (Van Breemen et al., 1995). For allelopathy, we ranked a higher value based on the probability to facilitate surrounding species (i.e. non-allelopathy plants) (Gómez-Aparicio & Canham, 2008). For nitrogen fixation, we ranked the higher value for nitrogen fixed plants for its ability to help its growth and maintenance (McKinley & Blair, 2008). For roots type, higher values were ranked by ability to increase nutrition cycling with lateral roots are better in accelerating soil nutrient cycling (Attiwill & Adams, 1993). For resprout, we ranked the higher value for its ability to resprout to sustain the woody plant habitat (Heisler et al., 2004). The numerical value ranked for each categorical trait and the range of trait value was shown in Supplementary Table 3 and Supplementary Fig. 3.



## Appendix S4. Publication bias examination

First, we used funnel plot to visually show the relationship between effect size residuals and study precision ( $1/SE$ ) (Supplementary Fig. 4). The funnel plots were based on a mixed-effect model estimating mean effect sizes of the dataset for each response variable. The funnel plots indicate that for ecosystem structure, function and composition dataset for either encroachment database or removal database, there is no visually publication bias. In addition, test for funnel plot asymmetry for the average, ecosystem structure, function and composition for the two databases are all insignificant ( $P > 0.05$ ), which accept the null hypothesis and means that these funnel plots are symmetry (Supplementary Table 4). Second, we tested the funnel asymmetry with modified Egger regression suggested by Nakagawa and Santos (2012) to examine the relationship between residual effect size and study precision ( $1/SE$ ) (Supplementary Table 5). Egger regression showed that (i) for the ecosystem structure and composition dataset of encroachment database, and the average dataset of removal database, there is no publication bias ( $P > 0.05$ ), while (ii) for the rest dataset in the two databases, there may exist publication bias ( $P < 0.05$ ). Third, we further used trim and fill test that searches for asymmetry in funnel plots and imputes 'missing' effect sizes to make the funnel plot symmetrical (Duval & Tweedie 2000) (Supplementary Table 6). For all the encroachment dataset, and the average, ecosystem structure and composition of removal dataset, the test accepts the null hypothesis (there is no missing data at the right/left side) with  $P$  value above 0.05.

Overall, the result of funnel plot, Egger regression and trim and fill test showed that there is no publication bias in encroachment database, but there might be potential publication bias in the ecosystem function of the removal database. This indicates that caution needed to be taken when interpreting the impact of removal on ecosystem function.

## Supplementary References

- Attiwill, P. M., & Adams, M. A. (1993). Nutrient cycling in forests. *New Phytologist*, *124*, 561-582.
- De Soyza, A. G., Whitford, W. G., Martinez-Meza, E., & Van Zee, J. W. (1997). Variation in creosotebush (*Larrea tridentata*) canopy morphology in relation to habitat, soil fertility and associated annual plant communities. *American Midland Naturalist*, *137*, 13-26.
- Duval, S. & Tweedie, R. (2000). Trim and fill: a simple funnel-plot-based method of testing and adjusting for publication bias in meta-analysis. *Biometrics*, *56*, 455-463.
- Gómez-Aparicio, L., & Canham, C. D. (2008). Neighbourhood analyses of the allelopathic effects of the invasive tree *Ailanthus altissima* in temperate forests. *Journal of Ecology*, *96*, 447-458.
- Heisler, J. L., Briggs, J. M., Knapp, A. K., Blair, J. M., & Seery, A. (2004). Direct and indirect effects of fire on shrub density and aboveground productivity in a mesic grassland. *Ecology*, *85*, 2245-2257.
- McKinley, D. C., & Blair, J. M. (2008). Woody plant encroachment by *Juniperus virginiana* in a mesic native grassland promotes rapid carbon and nitrogen accrual. *Ecosystems*, *11*, 454-468.
- Nakagawa, S., Noble, D.W., Senior, A.M. & Lagisz, M. (2017). Meta-evaluation of meta-analysis: ten appraisal questions for biologists. *BMC Biology*, *15*, 18.
- Okin, G. S., Gillette, D. A., & Herrick, J. E. (2006). Multi-scale controls on and consequences of aeolian processes in landscape change in arid and semi-arid environments. *Journal of Arid Environments*, *65*, 253-275.
- Van Breemen, N. (1995). Nutrient cycling strategies. *Plant and Soil*, *168*, 321-326.
- Wang, X. P., Zhang, Y. F., Wang, Z. N., Pan, Y. X., Hu, R., Li, X. J., & Zhang, H. (2013). Influence of shrub canopy morphology and rainfall characteristics on stemflow within a revegetated sand dune in the Tengger Desert, NW China. *Hydrological Processes*, *27*, 1501-1509.
- Zou, C. B., Caterina, G. L., Will, R. E., Stebler, E., & Turton, D. (2015). Canopy interception for a tallgrass prairie under juniper encroachment. *PLoS One*, *10*, e0141422.
